# Supplementary material
Source: HighWire-hosted journal article supplement (https://gut.bmj.com/content/71/8/1588)
Supplement: inline-supplementary-material-1 [file inline-supplementary-material-1.pdf]

Table S1. List of all genes/proteins/peptides, including antibody targets, listed in the manuscript. Genes/proteins/peptides are listed in the first column, and the corresponding antibody targets are listed in the second column. The table is organized into several sections based on the type of target (e.g., protein, peptide, antibody) and the corresponding antibody target (e.g., protein, peptide, antibody).

| Gene/protein/peptide | Antibody target  |
|----------------------|------------------|
| 1. <i>ACE2</i>       | 1. <i>ACE2</i>   |
| 2. <i>ACE2</i>       | 2. <i>ACE2</i>   |
| 3. <i>ACE2</i>       | 3. <i>ACE2</i>   |
| 4. <i>ACE2</i>       | 4. <i>ACE2</i>   |
| 5. <i>ACE2</i>       | 5. <i>ACE2</i>   |
| 6. <i>ACE2</i>       | 6. <i>ACE2</i>   |
| 7. <i>ACE2</i>       | 7. <i>ACE2</i>   |
| 8. <i>ACE2</i>       | 8. <i>ACE2</i>   |
| 9. <i>ACE2</i>       | 9. <i>ACE2</i>   |
| 10. <i>ACE2</i>      | 10. <i>ACE2</i>  |
| 11. <i>ACE2</i>      | 11. <i>ACE2</i>  |
| 12. <i>ACE2</i>      | 12. <i>ACE2</i>  |
| 13. <i>ACE2</i>      | 13. <i>ACE2</i>  |
| 14. <i>ACE2</i>      | 14. <i>ACE2</i>  |
| 15. <i>ACE2</i>      | 15. <i>ACE2</i>  |
| 16. <i>ACE2</i>      | 16. <i>ACE2</i>  |
| 17. <i>ACE2</i>      | 17. <i>ACE2</i>  |
| 18. <i>ACE2</i>      | 18. <i>ACE2</i>  |
| 19. <i>ACE2</i>      | 19. <i>ACE2</i>  |
| 20. <i>ACE2</i>      | 20. <i>ACE2</i>  |
| 21. <i>ACE2</i>      | 21. <i>ACE2</i>  |
| 22. <i>ACE2</i>      | 22. <i>ACE2</i>  |
| 23. <i>ACE2</i>      | 23. <i>ACE2</i>  |
| 24. <i>ACE2</i>      | 24. <i>ACE2</i>  |
| 25. <i>ACE2</i>      | 25. <i>ACE2</i>  |
| 26. <i>ACE2</i>      | 26. <i>ACE2</i>  |
| 27. <i>ACE2</i>      | 27. <i>ACE2</i>  |
| 28. <i>ACE2</i>      | 28. <i>ACE2</i>  |
| 29. <i>ACE2</i>      | 29. <i>ACE2</i>  |
| 30. <i>ACE2</i>      | 30. <i>ACE2</i>  |
| 31. <i>ACE2</i>      | 31. <i>ACE2</i>  |
| 32. <i>ACE2</i>      | 32. <i>ACE2</i>  |
| 33. <i>ACE2</i>      | 33. <i>ACE2</i>  |
| 34. <i>ACE2</i>      | 34. <i>ACE2</i>  |
| 35. <i>ACE2</i>      | 35. <i>ACE2</i>  |
| 36. <i>ACE2</i>      | 36. <i>ACE2</i>  |
| 37. <i>ACE2</i>      | 37. <i>ACE2</i>  |
| 38. <i>ACE2</i>      | 38. <i>ACE2</i>  |
| 39. <i>ACE2</i>      | 39. <i>ACE2</i>  |
| 40. <i>ACE2</i>      | 40. <i>ACE2</i>  |
| 41. <i>ACE2</i>      | 41. <i>ACE2</i>  |
| 42. <i>ACE2</i>      | 42. <i>ACE2</i>  |
| 43. <i>ACE2</i>      | 43. <i>ACE2</i>  |
| 44. <i>ACE2</i>      | 44. <i>ACE2</i>  |
| 45. <i>ACE2</i>      | 45. <i>ACE2</i>  |
| 46. <i>ACE2</i>      | 46. <i>ACE2</i>  |
| 47. <i>ACE2</i>      | 47. <i>ACE2</i>  |
| 48. <i>ACE2</i>      | 48. <i>ACE2</i>  |
| 49. <i>ACE2</i>      | 49. <i>ACE2</i>  |
| 50. <i>ACE2</i>      | 50. <i>ACE2</i>  |
| 51. <i>ACE2</i>      | 51. <i>ACE2</i>  |
| 52. <i>ACE2</i>      | 52. <i>ACE2</i>  |
| 53. <i>ACE2</i>      | 53. <i>ACE2</i>  |
| 54. <i>ACE2</i>      | 54. <i>ACE2</i>  |
| 55. <i>ACE2</i>      | 55. <i>ACE2</i>  |
| 56. <i>ACE2</i>      | 56. <i>ACE2</i>  |
| 57. <i>ACE2</i>      | 57. <i>ACE2</i>  |
| 58. <i>ACE2</i>      | 58. <i>ACE2</i>  |
| 59. <i>ACE2</i>      | 59. <i>ACE2</i>  |
| 60. <i>ACE2</i>      | 60. <i>ACE2</i>  |
| 61. <i>ACE2</i>      | 61. <i>ACE2</i>  |
| 62. <i>ACE2</i>      | 62. <i>ACE2</i>  |
| 63. <i>ACE2</i>      | 63. <i>ACE2</i>  |
| 64. <i>ACE2</i>      | 64. <i>ACE2</i>  |
| 65. <i>ACE2</i>      | 65. <i>ACE2</i>  |
| 66. <i>ACE2</i>      | 66. <i>ACE2</i>  |
| 67. <i>ACE2</i>      | 67. <i>ACE2</i>  |
| 68. <i>ACE2</i>      | 68. <i>ACE2</i>  |
| 69. <i>ACE2</i>      | 69. <i>ACE2</i>  |
| 70. <i>ACE2</i>      | 70. <i>ACE2</i>  |
| 71. <i>ACE2</i>      | 71. <i>ACE2</i>  |
| 72. <i>ACE2</i>      | 72. <i>ACE2</i>  |
| 73. <i>ACE2</i>      | 73. <i>ACE2</i>  |
| 74. <i>ACE2</i>      | 74. <i>ACE2</i>  |
| 75. <i>ACE2</i>      | 75. <i>ACE2</i>  |
| 76. <i>ACE2</i>      | 76. <i>ACE2</i>  |
| 77. <i>ACE2</i>      | 77. <i>ACE2</i>  |
| 78. <i>ACE2</i>      | 78. <i>ACE2</i>  |
| 79. <i>ACE2</i>      | 79. <i>ACE2</i>  |
| 80. <i>ACE2</i>      | 80. <i>ACE2</i>  |
| 81. <i>ACE2</i>      | 81. <i>ACE2</i>  |
| 82. <i>ACE2</i>      | 82. <i>ACE2</i>  |
| 83. <i>ACE2</i>      | 83. <i>ACE2</i>  |
| 84. <i>ACE2</i>      | 84. <i>ACE2</i>  |
| 85. <i>ACE2</i>      | 85. <i>ACE2</i>  |
| 86. <i>ACE2</i>      | 86. <i>ACE2</i>  |
| 87. <i>ACE2</i>      | 87. <i>ACE2</i>  |
| 88. <i>ACE2</i>      | 88. <i>ACE2</i>  |
| 89. <i>ACE2</i>      | 89. <i>ACE2</i>  |
| 90. <i>ACE2</i>      | 90. <i>ACE2</i>  |
| 91. <i>ACE2</i>      | 91. <i>ACE2</i>  |
| 92. <i>ACE2</i>      | 92. <i>ACE2</i>  |
| 93. <i>ACE2</i>      | 93. <i>ACE2</i>  |
| 94. <i>ACE2</i>      | 94. <i>ACE2</i>  |
| 95. <i>ACE2</i>      | 95. <i>ACE2</i>  |
| 96. <i>ACE2</i>      | 96. <i>ACE2</i>  |
| 97. <i>ACE2</i>      | 97. <i>ACE2</i>  |
| 98. <i>ACE2</i>      | 98. <i>ACE2</i>  |
| 99. <i>ACE2</i>      | 99. <i>ACE2</i>  |
| 100. <i>ACE2</i>     | 100. <i>ACE2</i> |

| Category   | Item     | Value |
|------------|----------|-------|
| Category 1 | Item 1.1 | 100   |
|            | Item 1.2 | 200   |
|            | Item 1.3 | 300   |
|            | Item 1.4 | 400   |
| Category 2 | Item 2.1 | 500   |
|            | Item 2.2 | 600   |
|            | Item 2.3 | 700   |
|            | Item 2.4 | 800   |
| Category 3 | Item 3.1 | 900   |
|            | Item 3.2 | 1000  |
|            | Item 3.3 | 1100  |
|            | Item 3.4 | 1200  |
| Category 4 | Item 4.1 | 1300  |
|            | Item 4.2 | 1400  |
|            | Item 4.3 | 1500  |
|            | Item 4.4 | 1600  |
| Category 5 | Item 5.1 | 1700  |
|            | Item 5.2 | 1800  |
|            | Item 5.3 | 1900  |
|            | Item 5.4 | 2000  |

[illegible]

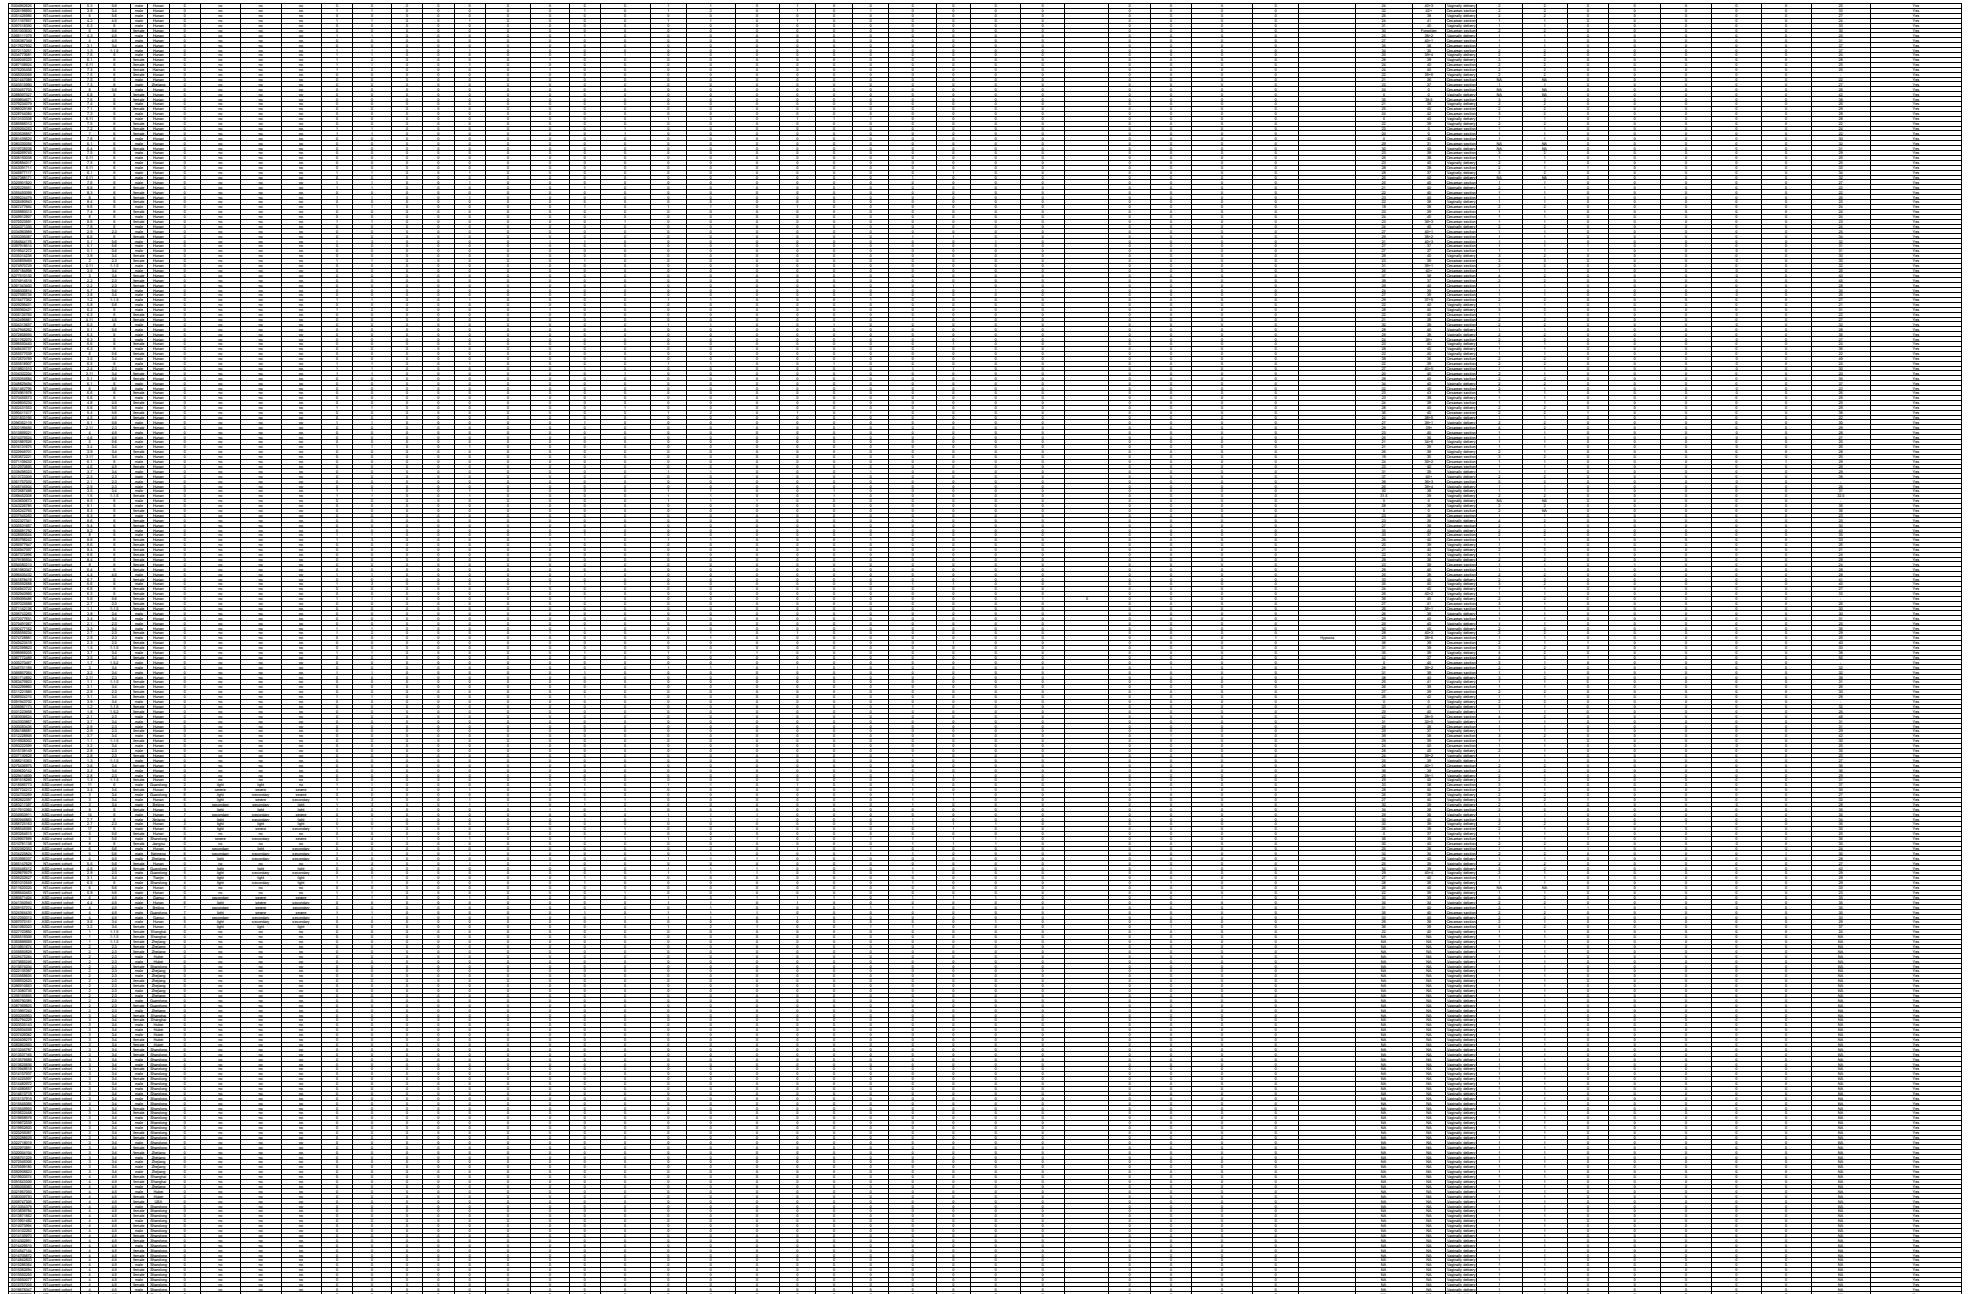

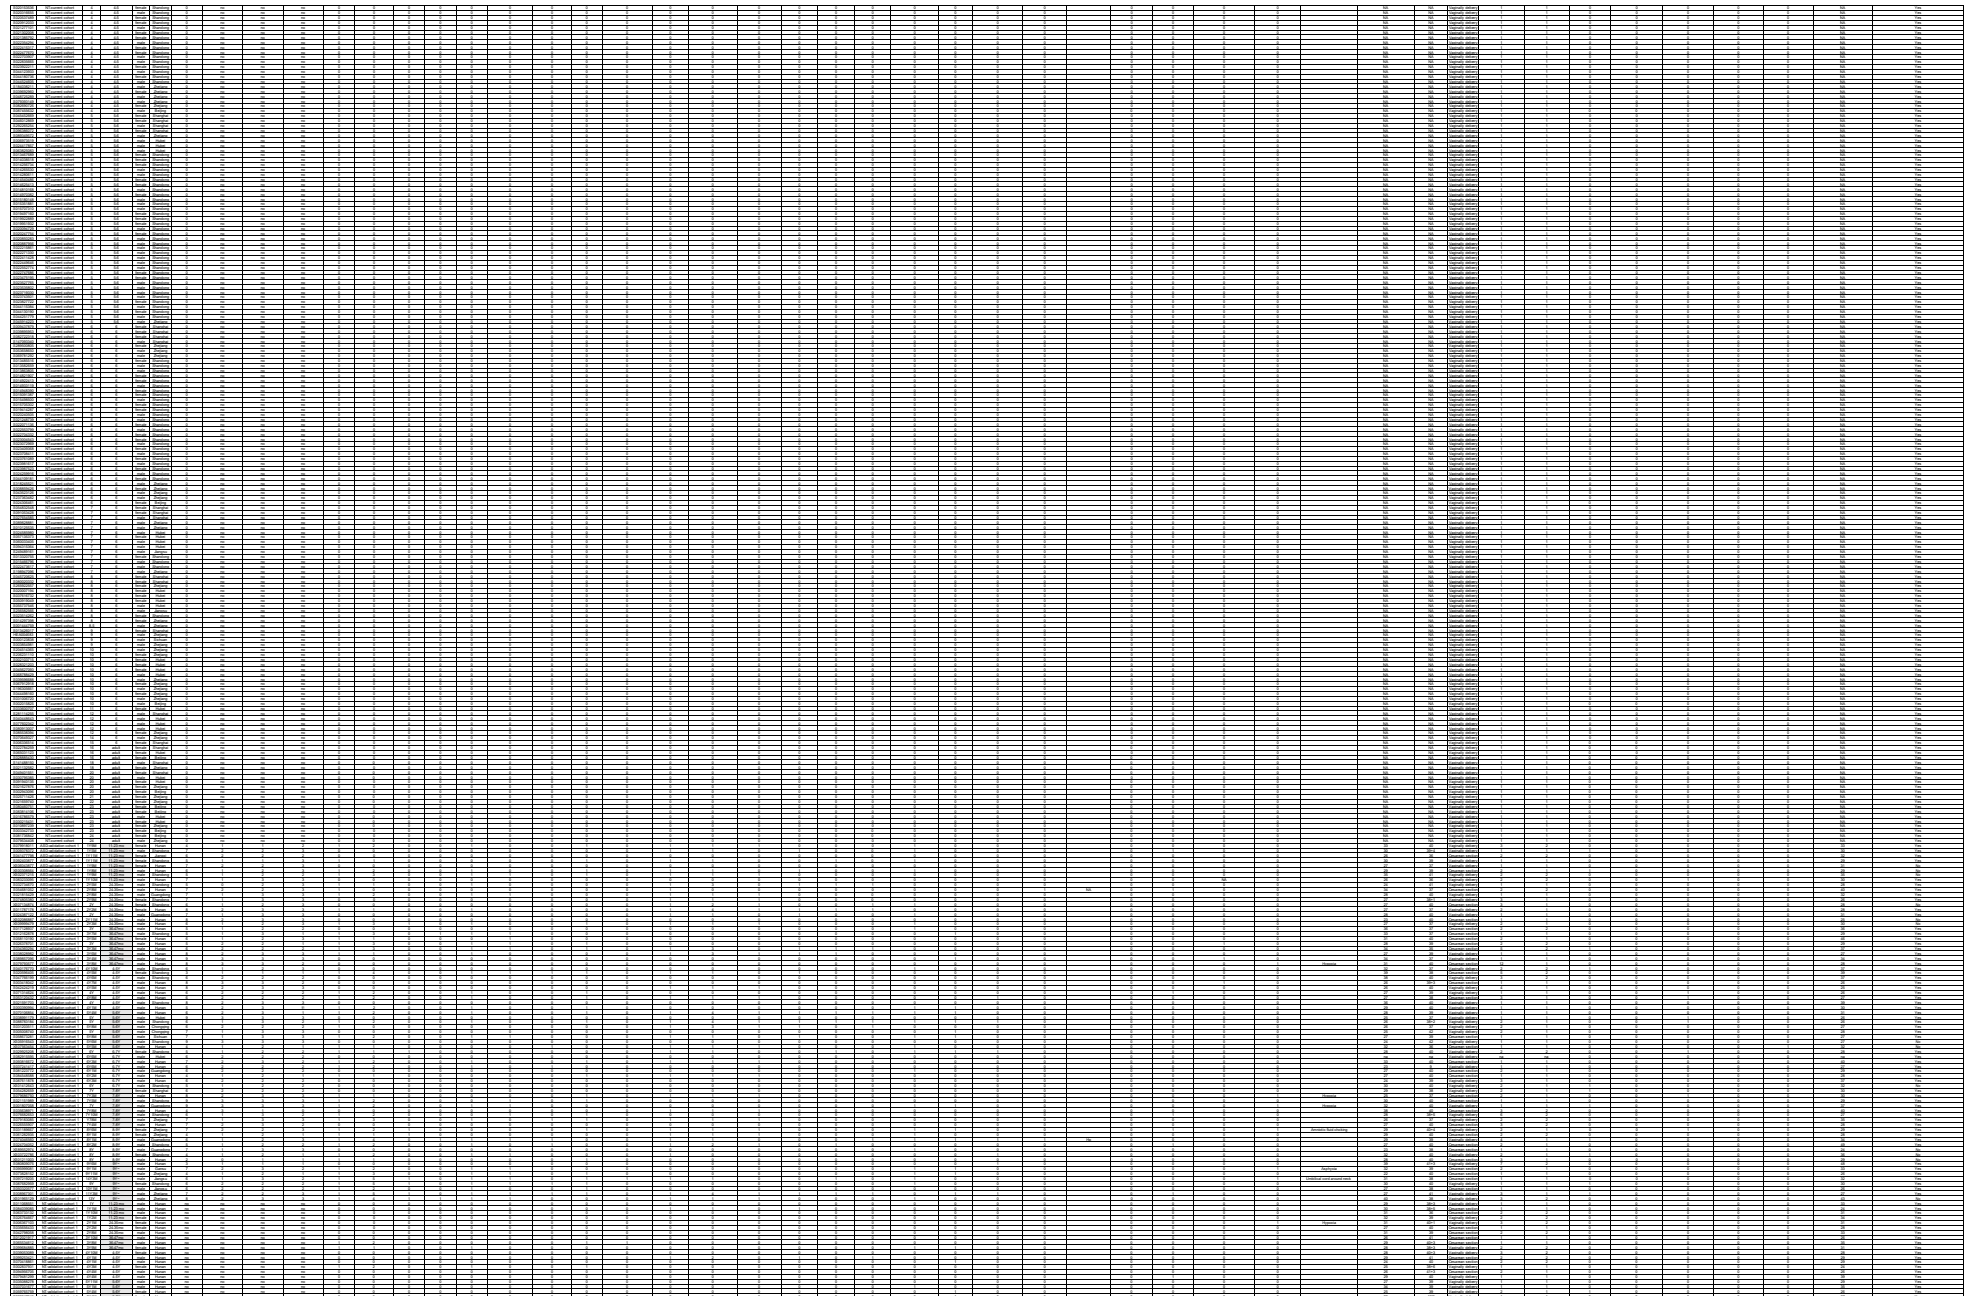

[illegible]

| Table 2 Summary of subject's distributions according to age categories |                  |     |      |
|------------------------------------------------------------------------|------------------|-----|------|
| Current cohort                                                         | age brackets (y) | ASD | NT   |
|                                                                        | 1-1.5            | 11  | 16   |
|                                                                        | 1.5-2            | 14  | 3    |
|                                                                        | 2-3              | 128 | 40   |
|                                                                        | 3-4              | 179 | 70   |
|                                                                        | 4-5              | 134 | 63   |
|                                                                        | 5-6              | 152 | 75   |
|                                                                        | 6-7Y             | 34  | 65   |
|                                                                        | 7-8Y             | 40  | 33   |
|                                                                        | 8-9Y             | 29  | 29   |
|                                                                        | 9-12Y            | 39  | 28   |
|                                                                        | 12-15Y           | 9   | 8    |
|                                                                        | adult            | 3   | 20   |
|                                                                        | total            | 772 | 450  |
| Validation cohort 1                                                    | age brackets     | ASD | NT   |
|                                                                        | 11-23 mo         | 8   | 4    |
|                                                                        | 24-35mo          | 9   | 3    |
|                                                                        | 36-47mo          | 8   | 3    |
|                                                                        | 4-5Y             | 9   | 6    |
|                                                                        | 5-6Y             | 8   | 5    |
|                                                                        | 6-7Y             | 8   | 4    |
|                                                                        | 7-8Y             | 8   | 3    |
|                                                                        | 8-9Y             | 7   | 4    |
|                                                                        | 9Y~              | 8   | none |
|                                                                        | total            | 73  | 32   |

**Table 3 Identification of severity levels for autism spectrum disorder based on DSM-IV and DSM-V**

|          | Social communication                                                                                                                                                                                                                                                                                         | Restricted, repetitive behaviors                                                                                                                                                                                                                                                                              | Language development delay                                                               |
|----------|--------------------------------------------------------------------------------------------------------------------------------------------------------------------------------------------------------------------------------------------------------------------------------------------------------------|---------------------------------------------------------------------------------------------------------------------------------------------------------------------------------------------------------------------------------------------------------------------------------------------------------------|------------------------------------------------------------------------------------------|
| Mild     | Requiring support. Without supports in place, deficits in social communication cause noticeable impairments. Difficulty initiating social interactions, and clear examples of atypical or unsuccessful response to social overtures of others. May appear to have decreased interest in social interactions. | Requiring support. Inflexibility of behavior causes significant interference with functioning in one or more contexts. Difficulty switching between activities. Problems of organization and planning hamper independence.                                                                                    | Difficulty in putting words together into a sentence or leaving words out of a sentence. |
| Moderate | Requiring substantial support. Marked deficits in verbal and nonverbal social communication skills; social impairments apparent even with supports in place; limited initiation of social interactions; and reduced or abnormal responses to social overtures from others.                                   | Requiring substantial support. Inflexibility of behavior, difficulty coping with change, or other restricted/repetitive behaviors appear frequently enough to be obvious to the casual observer and interfere with functioning in a variety of contexts. Distress and/or difficulty changing focus or action. | Imitation, just babbling or inability to speak in short sentences.                       |
| Severe   | Requiring very substantial support. Severe deficits in verbal and nonverbal social communication skills cause severe impairments in functioning, very limited initiation of social interactions, and minimal response to social overtures from others.                                                       | Requiring very substantial support. Inflexibility of behavior, extreme difficulty coping with change, or other restricted/repetitive behaviors markedly interfere with functioning in all spheres. Great distress/difficulty changing focus or action.                                                        | Language only for needs or not talking.                                                  |

Table 4 Summary of **subject's distributions** according to district categories

|                            | Table 4 Summary of <b>subject's distributions</b> according to district categories |     |     |
|----------------------------|------------------------------------------------------------------------------------|-----|-----|
|                            | Region                                                                             | ASD | NT  |
| <b>Current cohort</b>      | Hunan                                                                              | 285 | 198 |
|                            | Guandong                                                                           | 104 | 2   |
|                            | Shandong                                                                           | 65  | 120 |
|                            | Beijing                                                                            | 56  | 10  |
|                            | Sichuan                                                                            | 36  | 1   |
|                            | Hubei                                                                              | 28  | 33  |
|                            | Shanghai                                                                           | 25  | 25  |
|                            | Zhejiang                                                                           | 24  | 57  |
|                            | Jiangsu                                                                            | 20  | 3   |
|                            | Jiangxi                                                                            | 18  | 0   |
|                            | Shanxi                                                                             | 15  | 0   |
|                            | Hebei                                                                              | 13  | 0   |
|                            | Chongqing                                                                          | 11  | 0   |
|                            | Tianjin                                                                            | 11  | 0   |
|                            | Xinjiang                                                                           | 11  | 0   |
|                            | Anhui                                                                              | 9   | 0   |
|                            | Henan                                                                              | 9   | 0   |
|                            | Gansu                                                                              | 6   | 0   |
|                            | Guanxi                                                                             | 5   | 0   |
|                            | Fujian                                                                             | 4   | 0   |
|                            | Hainan                                                                             | 4   | 1   |
|                            | Liaoning                                                                           | 4   | 0   |
|                            | Neimeng                                                                            | 4   | 0   |
|                            | Guizhou                                                                            | 3   | 1   |
|                            | Jilin                                                                              | 2   | 0   |
| <b>Validation cohort 1</b> | Region                                                                             | ASD | NT  |
|                            | Hunan                                                                              | 31  | 32  |
|                            | Shandong                                                                           | 20  | 0   |
|                            | Guandong                                                                           | 6   | 0   |
|                            | Zhejiang                                                                           | 6   | 0   |
|                            | Chongqing                                                                          | 2   | 0   |
|                            | Hubei                                                                              | 2   | 0   |
|                            | Jiangsu                                                                            | 2   | 0   |
|                            | Gansu                                                                              | 1   | 0   |
|                            | Jiangxi                                                                            | 1   | 0   |
|                            | Shanghai                                                                           | 1   | 0   |
|                            | Sichuan                                                                            | 1   | 0   |

| Table5 Alpha diversity under different under different parameters |           |                   |         |               |                |            |
|-------------------------------------------------------------------|-----------|-------------------|---------|---------------|----------------|------------|
| shannon                                                           | 20 adults | 5.73 ± 0.756      | p value | Adults vs. NT | Adults vs. ASD | NT vs. ASD |
|                                                                   | NT        | 5.4206 ± 1.14     |         | 0.4691        | 0.0007         | <0.0001    |
|                                                                   | ASD       | 4.77 ± 1.16       |         |               |                |            |
| simpson                                                           | 20 adults | 0.94 ± 0.04       | p value | Adults vs. NT | Adults vs. ASD | NT vs. ASD |
|                                                                   | NT        | 0.91 ± 0.09       |         | 0.3992        | 0.0141         | <0.0001    |
|                                                                   | ASD       | 0.87 ± 0.12       |         |               |                |            |
| chao1                                                             | 20 adults | 2355.07 ± 1274.39 | p value | Adults vs. NT | Adults vs. ASD | NT vs. ASD |
|                                                                   | NT        | 2977.13 ± 1583.84 |         | 0.1283        | 0.9587         | <0.0001    |
|                                                                   | ASD       | 2267.15 ± 1294.37 |         |               |                |            |
| ace                                                               | 20 adults | 2394.17 ± 1329.29 | p value | Adults vs. NT | Adults vs. ASD | NT vs. ASD |
|                                                                   | NT        | 3052.70 ± 1630.33 |         | 0.1118        | 0.9717         | <0.0001    |
|                                                                   | ASD       | 2319.87 ± 1319.99 |         |               |                |            |
| goods_coverage                                                    | 20 adults | 99.51% ± 0.33%    | p value | NA            |                |            |
|                                                                   | NT        | 99.35% ± 0.39%    |         |               |                |            |
|                                                                   | ASD       | 99.55% ± 0.29%    |         |               |                |            |

| Shannon index |             |             |             |             |
|---------------|-------------|-------------|-------------|-------------|
|               | NT          |             | ASD         |             |
|               | mean        | sd          | mean        | sd          |
| 0-16mo        | 4.759399451 | 1.359547967 | 3.836082927 | 0.964003457 |
| 16-18mo       | 3.764213312 | 1.025357825 | 2.849265085 | 1.619845272 |
| 18-20mo       | 4.196894667 | 0.606140885 | 3.616706239 | 1.347681161 |
| 20-22mo       | 4.926090339 | 0.752870905 | 3.775844587 | 1.573532974 |
| 22-24mo       | 5.542285549 | 1.01700189  | 3.841787444 | 1.387423655 |
| 24-26mo       | 5.463804669 | 1.194155942 | 4.701179309 | 0.926512271 |
| 26-28mo       | 5.022808685 | 1.136191124 | 4.458895719 | 0.733147925 |
| 28-30mo       | 4.353316031 | 0.753168643 | 4.586324527 | 1.110997305 |
| 30-32mo       | 4.745291597 | 0.912644623 | 4.570967246 | 1.179000381 |
| 32-34mo       | 4.642527458 | 0.76418573  | 5.26308442  | 0.960932    |
| 34-36mo       | 5.21101315  | 0.84406933  | 4.647607285 | 1.099560467 |
| 3-4y          | 4.543924885 | 1.135308193 | 4.568936906 | 1.000936654 |
| 4-5y          | 5.59501416  | 0.995748552 | 4.928618373 | 1.122853308 |
| 5-6y          | 5.47851421  | 1.041302464 | 4.858354881 | 1.109141125 |
| 6-7y          | 5.743279675 | 1.157214041 | 4.97313772  | 1.213777533 |
| 7-8y          | 5.60510922  | 1.060199335 | 4.984953987 | 1.299020924 |
| 8-9y          | 6.011443948 | 1.199575446 | 5.329017922 | 1.058225814 |
| 9-16y         | 5.781164334 | 1.030728251 | 5.299373648 | 1.081186082 |
| adults        | 5.7284785   | 0.757131446 | 5.230236748 | 0.22090182  |

**Table 6 Host multifactorial effects on composition of gut microbiota calculated by EnvFit**

| Factors                            | EnvFit   |         |          |         |
|------------------------------------|----------|---------|----------|---------|
|                                    | ≤3y      |         | >3y      |         |
|                                    | r-square | p value | r-square | p value |
| ASD diagnosis                      | 0.0170   | 0.038   | 0.0173   | 0.001   |
| District                           | 0.0544   | 0.981   | 0.0295   | 0.196   |
| Age                                | 0.0384   | 0.001   | 0.0283   | 0.001   |
| Gender                             | 0.0059   | 0.292   | 0.0010   | 0.379   |
| Any GI problem                     | 0.0033   | 0.49    | 0.0050   | 0.01    |
| Esophageal reflux                  | 0.0033   | 0.505   | 0.0019   | 0.165   |
| Peptic ulcer                       | 0.0019   | 0.687   | 0.0030   | 0.041   |
| Dyspepsia                          | 0.0019   | 0.69    | 0.0022   | 0.106   |
| Abdominal distension               | 0.0166   | 0.033   | 0.0003   | 0.753   |
| Abdominal pain                     | 0.0168   | 0.021   | 0.0016   | 0.198   |
| Constipation                       | 0.0064   | 0.266   | 0.0049   | 0.009   |
| Abnormal stool consistency         | 0.0137   | 0.055   | 0.0006   | 0.569   |
| Any Sleep complaints               | 0.0153   | 0.045   | 0.0011   | 0.334   |
| Difficulty falling asleep          | 0.0089   | 0.149   | 0.0001   | 0.92    |
| Sleep fragmentation                | 0.0155   | 0.042   | 0.0024   | 0.089   |
| Short sleep duration               | 0.0021   | 0.638   | 0.0006   | 0.565   |
| Shallow sleep                      | 0.0131   | 0.057   | 0.0001   | 0.914   |
| Food allergy or intolerance        | 0.0070   | 0.233   | 0.0103   | 0.001   |
| Skin allergy                       | 0.0015   | 0.724   | 0.0004   | 0.707   |
| Respiratory hypersensitivity       | 0.0113   | 0.084   | 0.0027   | 0.072   |
| Antibiotic usage with in 3 mo      | 0.0149   | 0.047   | 0.0113   | 0.001   |
| Infection within 1 mo              | 0.0025   | 0.605   | 0.0002   | 0.791   |
| Age of mother during pregnancy     | 0.0000   | 1.000   | 0.0000   | 1.000   |
| Age of father during pregnancy     | 0.0000   | 1.000   | 0.0000   | 1.000   |
| Assisted reproduction              | 0.0111   | 0.09    | 0.0028   | 0.069   |
| Smoking                            | 0.0000   | 1.000   | 0.0001   | 0.965   |
| Drinking                           | 0.0056   | 0.329   | 0.0002   | 0.825   |
| Infection during pregnancy         | 0.0023   | 0.603   | 0.0007   | 0.489   |
| Eclampsia/Pre-eclampsia            | 0.0052   | 0.37    | 0.0011   | 0.355   |
| Gestational age                    | 0.0000   | 1.000   | 0.0000   | 1.000   |
| Mode of delivery                   | 0.0037   | 0.454   | 0.0024   | 0.081   |
| Neonatal asphyxia                  | 0.0001   | 0.971   | 0.0028   | 0.062   |
| Family history of mental disorders | 0.0129   | 0.054   | 0.0030   | 0.049   |
| ...                                |          |         |          |         |

| Table 7 Summary of demographic and clinical characteristics of healthy children (NT) and kids with ASD |                |                                                      |                                     |                   |                              |
|--------------------------------------------------------------------------------------------------------|----------------|------------------------------------------------------|-------------------------------------|-------------------|------------------------------|
| Current cohort                                                                                         | Diagnosis      | Total ASD score                                      | mean ± SEM                          | ASD               | NT (healthy adults included) |
|                                                                                                        |                | Repetitive behavior                                  | mean ± SEM                          | 1.38 ± 0.05       | /                            |
|                                                                                                        |                | Social retardation                                   | mean ± SEM                          | 2.00 ± 0.07       | /                            |
|                                                                                                        |                | Language retardation                                 | mean ± SEM                          | 2.04 ± 0.07       | /                            |
|                                                                                                        | Demographic    | Gender                                               | Female (Male)                       | 127 (645)         | 217 (233)                    |
|                                                                                                        |                | Any GI problems                                      | Yes/all                             | 494/772 (63.9%)   | 48/450 (10.7%)               |
|                                                                                                        | Comorbidity    | Mean value of total GI problem score of each subject | mean ± SEM                          | 1.05 ± 1.33       | 0.18 ± 0.56                  |
|                                                                                                        |                | Esophageal reflux                                    | Yes/all                             | 54/772 (6.9%)     | 2/450 (0.4%)                 |
|                                                                                                        |                | Peptic ulcer                                         | Yes/all                             | 10/772 (1.3%)     | 1/450 (0.2%)                 |
|                                                                                                        |                | Dyspepsia                                            | Yes/all                             | 238/772 (30.8%)   | 15/450 (3.3%)                |
|                                                                                                        |                | Abdominal distension                                 | Yes/all                             | 129/772 (16.7%)   | 1/450 (0.2%)                 |
|                                                                                                        |                | Abdominal pain                                       | Yes/all                             | 61/772 (7.9%)     | 9/450 (2%)                   |
|                                                                                                        |                | Constipation                                         | Yes/all                             | 346/772 (44.8%)   | 19/450 (4.2%)                |
|                                                                                                        |                | Abnormal stool consistency                           | Yes/all                             | 127/772 (16.4%)   | 7/450 (1.6%)                 |
|                                                                                                        |                | Any sleep complaints                                 | Yes/all                             | 354/772 (45.8%)   | 21/450 (4.7%)                |
|                                                                                                        |                | Mean value of sleep complaints score                 | mean ± SEM                          | 0.71 ± 1.02       | 0.07 ± 0.25                  |
|                                                                                                        |                | Difficulty falling asleep                            | Yes/all                             | 193/772 (25.0%)   | 2/450 (0.4%)                 |
|                                                                                                        |                | Sleep fragmentation                                  | Yes/all                             | 216/772 (27.9%)   | 9/450 (2.1%)                 |
|                                                                                                        |                | Short sleep duration                                 | Yes/all                             | 84/772 (10.9%)    | 7/450 (1.6%)                 |
|                                                                                                        |                | Shallow sleep                                        | Yes/all                             | 119/772 (15.4%)   | 7/450 (1.6%)                 |
|                                                                                                        |                | Total Allergy score                                  | mean ± SEM                          | 0.67 ± 0.03       | 0.13 ± 0.02                  |
|                                                                                                        |                | Food allergy or intolerance                          | Yes/all                             | 353/772 (45.7%)   | 15/450 (3.3%)                |
|                                                                                                        |                | Skin allergy                                         | Yes/all                             | 157/772 (20.3%)   | 15/450 (3.3%)                |
|                                                                                                        |                | Respiratory hypersensitivity                         | Yes/all                             | 109/772 (14.1%)   | 5/450 (1.1%)                 |
|                                                                                                        | Clinical       | Antibiotic usage within 3 mo                         | Yes/all                             | 67/772 (8.7%)     | 3/450 (0.6%)                 |
|                                                                                                        |                | Any infection within 1 mo                            | Yes/all                             | 21/772 (2.7%)     | 2/450 (0.4%)                 |
|                                                                                                        | Perinatal      | Any neonatal asphyxia                                | Yes/all                             | 51/772 (6.6%)     | 1/450 (0.02%)                |
|                                                                                                        |                | Age of mother during pregnancy                       | mean ± SEM                          | 29.28 ± 0.20      | 26.58 ± 0.34                 |
|                                                                                                        |                | Age of father during pregnancy                       | mean ± SEM                          | 31.83 ± 0.21      | 29.88 ± 0.26                 |
|                                                                                                        |                | Premature delivery                                   | Yes/all/NA or Forgotten             | 83/772 (10.7%) /0 | 18/197 (9.1%) /253           |
|                                                                                                        |                | Mode of delivery                                     | Cesarean section/Vaginally delivery | 446/327           | 106/343                      |
|                                                                                                        |                | Assisted reproduction                                | Yes/all                             | 97/772 (12.5%)    | 7/450 (1.6%)                 |
|                                                                                                        |                | Eclampsia/Pre-eclampsia                              | Yes/all                             | 9/772 (1.2%)      | 2/450 (0.4%)                 |
|                                                                                                        |                | Infection during pregnancy                           | Yes/all                             | 55/772 (7.1%)     | 1/450 (0.2%)                 |
|                                                                                                        | Family history | Family history of mental disorders                   | Yes/all                             | 42/772 (5.4%)     | 0/450 (0%)                   |
| Validation cohort 1                                                                                    | Diagnosis      | Total ASD score                                      | mean ± SEM                          | ASD               | NT                           |
|                                                                                                        |                | Repetitive behavior                                  | mean ± SEM                          | 6.21 ± 0.18       | /                            |
|                                                                                                        |                | Social retardation                                   | mean ± SEM                          | 1.62 ± 0.08       | /                            |
|                                                                                                        |                | Language retardation                                 | mean ± SEM                          | 2.34 ± 0.07       | /                            |
|                                                                                                        | Demographic    | Gender                                               | Female (Male)                       | 2.27 ± 0.09       | /                            |
|                                                                                                        |                | Any GI problems                                      | Yes/all                             | 15 (73)           | 14 (32)                      |
|                                                                                                        | Comorbidity    | Mean value of total GI problem score of each subject | mean ± SEM                          | 45/73 (61.6%)     | 5/32 (15.6%)                 |
|                                                                                                        |                | Esophageal reflux                                    | Yes/all                             | 1.33 ± 0.17       | 0.31 ± 0.15                  |
|                                                                                                        |                | Peptic ulcer                                         | Yes/all                             | 8/73 (10.9%)      | 0/32 (0%)                    |
|                                                                                                        |                | Dyspepsia                                            | Yes/all                             | 3/73 (4.1%)       | 0/32 (0%)                    |
|                                                                                                        |                | Abdominal distension                                 | Yes/all                             | 32/73 (43.8%)     | 3/32 (9.4%)                  |
|                                                                                                        |                | Abdominal pain                                       | Yes/all                             | 19/73 (26.0%)     | 0/32 (0%)                    |
|                                                                                                        |                | Constipation                                         | Yes/all                             | 8/73 (10.9%)      | 1/32 (3.1%)                  |
|                                                                                                        |                | Abnormal stool consistency                           | Yes/all                             | 23/73 (31.5%)     | 4/32 (12.5%)                 |
|                                                                                                        |                | Any sleep complaints                                 | Yes/all                             | 1/73 (1.44%)      | 2/32 (6.3%)                  |
|                                                                                                        |                | Mean value of sleep complaints score                 | mean ± SEM                          | 37/73 (50.7%)     | 2/32 (6.3%)                  |
|                                                                                                        |                | Difficulty falling asleep                            | Yes/all                             | 0.78 ± 0.13       | 0.09 ± 0.07                  |
|                                                                                                        |                |                                                      |                                     | 24/73 (32.9%)     | 0/32 (0%)                    |

|                     |           |                                |                                     |                |                |
|---------------------|-----------|--------------------------------|-------------------------------------|----------------|----------------|
| Validation cohort 1 |           | Sleep fragmentation            | Yes/all                             | 13/73 (17.8%)  | 2/32 (6.3%)    |
|                     |           | Short sleep duration           | Yes/all                             | 11/73 (15.1%)  | 0/32 (0%)      |
|                     |           | Shallow sleep                  | Yes/all                             | 9/73 (12.3%)   | 1/32 (3.1%)    |
|                     |           | Total Allergy score            | mean ± SEM                          | 0.64 ± 0.10    | 0.28 ± 0.09    |
|                     |           | Food allergy or intolerance    | Yes/all                             | 26/73 (35.6%)  | 3/32 (9.4%)    |
|                     |           | Skin allergy                   | Yes/all                             | 14/73 (19.2%)  | 5/32 (15.6%)   |
|                     |           | Respiratory hypersensitivity   | Yes/all                             | 7/73 (9.6%)    | 1/32 (3.1%)    |
|                     |           | Antibiotic usage within 3 mo   | Yes/all                             | 7/73 (9.6%)    | 2/32 (6.3%)    |
|                     |           | Any infection within 1 mo      | Yes/all                             | 2/73 (2.7%)    | 0/32 (0%)      |
|                     |           | Any neonatal asphyxia          | Yes/all                             | 6/73 (8.2%)    | 1/32 (3.1%)    |
|                     | Clinical  | Age of mother during pregnancy | mean ± SEM                          | 28.83 ± 0.41   | 28.67 ± 0.27   |
|                     | Perinatal | Age of father during pregnancy | mean ± SEM                          | 30.00 ± 0.43   | 28.33 ± 0.80   |
|                     |           | Premature delivery             | Yes/all/NA or Forgotten             | 4/72 (5.5%) /1 | 1/32 (3.1%) /0 |
|                     |           | Mode of delivery               | Cesarean section/Vaginally delivery | 31/42          | 12/20          |
|                     |           | Assisted reproduction          | Yes/all                             | 11/73 (15.1%)  | 1/32 (3.1%)    |
|                     |           | Eclampsia/Pre-eclampsia        | Yes/all                             | 1/73 (1.44%)   | 0/32 (0%)      |
|                     |           | Infection during pregnancy     | Yes/all                             | 8/73 (10.9%)   | 0/32 (0%)      |
|                     |           | Family history                 | Family history of mental disorders  | Yes/all        | 3/72 (4.2%)    |
|                     |           |                                |                                     |                | 0/32 (0%)      |
|                     |           |                                |                                     |                |                |
|                     |           |                                |                                     |                |                |
|                     |           |                                |                                     |                |                |
|                     |           |                                |                                     |                |                |
|                     |           |                                |                                     |                |                |
|                     |           |                                |                                     |                |                |
|                     |           |                                |                                     |                |                |
|                     |           |                                |                                     |                |                |
|                     |           |                                |                                     |                |                |
|                     |           |                                |                                     |                |                |
|                     |           |                                |                                     |                |                |
|                     |           |                                |                                     |                |                |
|                     |           |                                |                                     |                |                |

Table 8 Predicted microbiota age and Physiological age.

| Group | Physiological age | Predicted microbiota age | Mean value of Physiological age - Predicted microbiota age of each subject,<br>mean ± SEM, p value were calculated by one-way ANOVA respectly. |              |             |              | Microbiota-for-age Z score (MAZ) of each subject.<br>The value of MAZ of each subject was calculated as: (microbiota age - median microbiota age of healthy children of same<br>physiological age) / (standard deviation of microbiota age of healthy children of the same physiological age). |              |
|-------|-------------------|--------------------------|------------------------------------------------------------------------------------------------------------------------------------------------|--------------|-------------|--------------|------------------------------------------------------------------------------------------------------------------------------------------------------------------------------------------------------------------------------------------------------------------------------------------------|--------------|
|       |                   |                          | NT                                                                                                                                             |              | ASD         |              | ASD                                                                                                                                                                                                                                                                                            |              |
|       |                   |                          | mean                                                                                                                                           | SEM          | mean        | SEM          | Physiological age                                                                                                                                                                                                                                                                              | MAZ          |
| ASD   | 1.1               | 1.063991283              | 0-16mo                                                                                                                                         | -7.388849941 | 6.164149533 | -0.867568166 | 1.1                                                                                                                                                                                                                                                                                            | -0.039034064 |
| ASD   | 1.1               | 1.781075827              | 16-18mo                                                                                                                                        | -0.698748974 | 0.742024791 | -0.385390627 | 1.1                                                                                                                                                                                                                                                                                            | -0.00024896  |
| ASD   | 1.11              | 3.15698653               | 18-20mo                                                                                                                                        | -0.547379962 | 0.228995236 | -0.080775177 | 1.11                                                                                                                                                                                                                                                                                           | 0.074170215  |
| ASD   | 1.4               | 0.565391134              | 20-22mo                                                                                                                                        | -0.980615501 | 0.265384868 | -0.109104888 | 1.4                                                                                                                                                                                                                                                                                            | -0.066001956 |
| ASD   | 1.4               | 0.70140548               | 22-24mo                                                                                                                                        | -2.569078497 | 0.184055844 | -5.626443526 | 1.4                                                                                                                                                                                                                                                                                            | -0.05864532  |
| ASD   | 1.4               | 2.292544432              | 24-26mo                                                                                                                                        | -2.180152462 | 0.793446388 | -1.061452151 | 1.4                                                                                                                                                                                                                                                                                            | 0.027414951  |
| ASD   | 1.4               | 4.436245802              | 26-28mo                                                                                                                                        | -1.294482887 | 0.658205823 | -1.170565375 | 1.4                                                                                                                                                                                                                                                                                            | 0.143361783  |
| ASD   | 1.4               | 0.377813951              | 28-30mo                                                                                                                                        | -0.634614481 | 0.416162351 | 0.017160573  | 1.4                                                                                                                                                                                                                                                                                            | -0.076147483 |
| ASD   | 1.5               | 1.282486519              | 30-32mo                                                                                                                                        | -0.661850718 | 0.369507484 | -0.904633062 | 1.5                                                                                                                                                                                                                                                                                            | -0.720506371 |
| ASD   | 1.6               | 0.36967383               | 32-34mo                                                                                                                                        | -0.515342378 | 0.713771612 | -0.802546909 | 1.6                                                                                                                                                                                                                                                                                            | -1.46481042  |
| ASD   | 1.6               | 0.529338239              | 34-36mo                                                                                                                                        | -2.395941997 | 0.411907781 | -3.125436405 | 1.6                                                                                                                                                                                                                                                                                            | -1.334620658 |
| ASD   | 1.6               | 2.217356637              | 3-4y                                                                                                                                           | -2.89390495  | 1.938138562 | -1.476573692 | 1.6                                                                                                                                                                                                                                                                                            | 0.041783222  |
| ASD   | 1.6               | 2.241657771              | 4-5y                                                                                                                                           | -5.079561805 | 1.481656833 | -2.768736079 | 1.6                                                                                                                                                                                                                                                                                            | 0.061598276  |
| ASD   | 1.6               | 3.203106806              | 5-6y                                                                                                                                           | -8.958558559 | 2.389885103 | -2.195826422 | 1.6                                                                                                                                                                                                                                                                                            | 0.845560218  |
| ASD   | 1.7               | 0.840901886              | 6-7y                                                                                                                                           | -10.03102089 | 2.415255895 | -1.895388965 | 1.7                                                                                                                                                                                                                                                                                            | -3.011405719 |
| ASD   | 1.7               | 1.937369565              | 7-8y                                                                                                                                           | -8.594485612 | 3.648938311 | -7.303945452 | 1.7                                                                                                                                                                                                                                                                                            | -0.186517188 |
| ASD   | 1.8               | 0.318060694              | 8-9y                                                                                                                                           | -11.1081029  | 3.833408235 | 0.063331717  | 1.8                                                                                                                                                                                                                                                                                            | -1.506895578 |
| ASD   | 1.8               | 0.803481103              | 9-16y                                                                                                                                          | -3.629092634 | 2.295032983 | -8.023251275 | 1.8                                                                                                                                                                                                                                                                                            | -1.111085594 |
| ASD   | 1.8               | 0.882089074              | adults                                                                                                                                         | -2.663537246 | 3.010763383 | -18.17773156 | 1.8                                                                                                                                                                                                                                                                                            | -1.046988949 |
| ASD   | 1.8               | 1.754950471              |                                                                                                                                                |              |             |              | 1.8                                                                                                                                                                                                                                                                                            | -0.335261034 |
| ASD   | 1.8               | 1.960165915              |                                                                                                                                                |              |             |              | 1.8                                                                                                                                                                                                                                                                                            | -0.167929129 |
| ASD   | 1.8               | 2.237232407              |                                                                                                                                                |              |             |              | 1.8                                                                                                                                                                                                                                                                                            | 0.05798985   |
| ASD   | 1.8               | 3.204896043              |                                                                                                                                                |              |             |              | 1.8                                                                                                                                                                                                                                                                                            | 0.847019155  |
| ASD   | 1.9               | 2.18280643               |                                                                                                                                                |              |             |              | 1.9                                                                                                                                                                                                                                                                                            | -0.468395672 |
| ASD   | 1.9               | 3.550967351              |                                                                                                                                                |              |             |              | 1.9                                                                                                                                                                                                                                                                                            | 1.935357817  |
| ASD   | 2                 | 0.467091715              |                                                                                                                                                |              |             |              | 2                                                                                                                                                                                                                                                                                              | -3.48277444  |
| ASD   | 2                 | 1.176347592              |                                                                                                                                                |              |             |              | 2                                                                                                                                                                                                                                                                                              | -2.236666425 |
| ASD   | 2                 | 1.259873981              |                                                                                                                                                |              |             |              | 2                                                                                                                                                                                                                                                                                              | -2.089916985 |
| ASD   | 2                 | 1.741770705              |                                                                                                                                                |              |             |              | 2                                                                                                                                                                                                                                                                                              | -1.243261513 |
| ASD   | 2                 | 1.770958338              |                                                                                                                                                |              |             |              | 2                                                                                                                                                                                                                                                                                              | -4.796785208 |
| ASD   | 2                 | 1.91951554               |                                                                                                                                                |              |             |              | 2                                                                                                                                                                                                                                                                                              | -4.430704934 |
| ASD   | 2                 | 1.926712148              |                                                                                                                                                |              |             |              | 2                                                                                                                                                                                                                                                                                              | -4.412970781 |
| ASD   | 2                 | 1.93072657               |                                                                                                                                                |              |             |              | 2                                                                                                                                                                                                                                                                                              | -4.40307829  |
| ASD   | 2                 | 1.943004082              |                                                                                                                                                |              |             |              | 2                                                                                                                                                                                                                                                                                              | -4.372823582 |
| ASD   | 2                 | 1.945972593              |                                                                                                                                                |              |             |              | 2                                                                                                                                                                                                                                                                                              | -4.365508465 |
| ASD   | 2                 | 2.108131684              |                                                                                                                                                |              |             |              | 2                                                                                                                                                                                                                                                                                              | -3.965909901 |
| ASD   | 2                 | 2.187255621              |                                                                                                                                                |              |             |              | 2                                                                                                                                                                                                                                                                                              | -3.770929706 |
| ASD   | 2                 | 2.29659678               |                                                                                                                                                |              |             |              | 2                                                                                                                                                                                                                                                                                              | -3.501487087 |
| ASD   | 2                 | 2.520844315              |                                                                                                                                                |              |             |              | 2                                                                                                                                                                                                                                                                                              | -2.948887834 |
| ASD   | 2                 | 2.935516641              |                                                                                                                                                |              |             |              | 2                                                                                                                                                                                                                                                                                              | -1.927036615 |
| ASD   | 2                 | 3.050283375              |                                                                                                                                                |              |             |              | 2                                                                                                                                                                                                                                                                                              | -1.64422409  |
| ASD   | 2                 | 3.161383723              |                                                                                                                                                |              |             |              | 2                                                                                                                                                                                                                                                                                              | -1.370446412 |
| ASD   | 2                 | 3.516339334              |                                                                                                                                                |              |             |              | 2                                                                                                                                                                                                                                                                                              | -0.495751377 |
| ASD   | 2                 | 3.709160877              |                                                                                                                                                |              |             |              | 2                                                                                                                                                                                                                                                                                              | -0.020593243 |
| ASD   | 2                 | 4.515946781              |                                                                                                                                                |              |             |              | 2                                                                                                                                                                                                                                                                                              | 1.96751908   |
| ASD   | 2                 | 5.023961999              |                                                                                                                                                |              |             |              | 2                                                                                                                                                                                                                                                                                              | 3.219389384  |
| ASD   | 2                 | 29.64666025              |                                                                                                                                                |              |             |              | 2                                                                                                                                                                                                                                                                                              | excluded     |
| ASD   | 2                 | 44.64305183              |                                                                                                                                                |              |             |              | 2                                                                                                                                                                                                                                                                                              | excluded     |
| ASD   | 2                 | 54.19206455              |                                                                                                                                                |              |             |              | 2                                                                                                                                                                                                                                                                                              | excluded     |
| ASD   | 2.1               | 1.245212627              |                                                                                                                                                |              |             |              | 2.1                                                                                                                                                                                                                                                                                            | excluded     |
| ASD   | 2.1               | 1.2649716                |                                                                                                                                                |              |             |              | 2.1                                                                                                                                                                                                                                                                                            | -1.044695913 |
| ASD   | 2.1               | 1.559959012              |                                                                                                                                                |              |             |              | 2.1                                                                                                                                                                                                                                                                                            | -1.03346807  |
| ASD   | 2.1               | 1.766049805              |                                                                                                                                                |              |             |              | 2.1                                                                                                                                                                                                                                                                                            | -0.865844365 |
| ASD   | 2.1               | 1.77713922               |                                                                                                                                                |              |             |              | 2.1                                                                                                                                                                                                                                                                                            | -0.748735291 |
| ASD   | 2.1               | 1.96702221               |                                                                                                                                                |              |             |              | 2.1                                                                                                                                                                                                                                                                                            | -0.74243384  |
| ASD   | 2.1               | 2.124653667              |                                                                                                                                                |              |             |              | 2.1                                                                                                                                                                                                                                                                                            | -0.634534692 |
| ASD   | 2.1               | 2.251197644              |                                                                                                                                                |              |             |              | 2.1                                                                                                                                                                                                                                                                                            | -0.544962161 |
| ASD   | 2.1               | 2.252430715              |                                                                                                                                                |              |             |              | 2.1                                                                                                                                                                                                                                                                                            | -0.473054787 |
| ASD   | 2.1               | 2.527564928              |                                                                                                                                                |              |             |              | 2.1                                                                                                                                                                                                                                                                                            | -0.472354107 |
| ASD   | 2.1               | 2.900313087              |                                                                                                                                                |              |             |              | 2.1                                                                                                                                                                                                                                                                                            | -0.316011787 |
| ASD   | 2.1               | 3.562744701              |                                                                                                                                                |              |             |              | 2.1                                                                                                                                                                                                                                                                                            | -0.104201299 |
| ASD   | 2.1               | 3.674741159              |                                                                                                                                                |              |             |              | 2.1                                                                                                                                                                                                                                                                                            | 0.272218973  |
| ASD   | 2.1               | 3.822704226              |                                                                                                                                                |              |             |              | 2.1                                                                                                                                                                                                                                                                                            | 0.335859863  |
| ASD   | 2.1               | 3.318712701              |                                                                                                                                                |              |             |              | 2.1                                                                                                                                                                                                                                                                                            | 0.419938425  |
| ASD   | 2.11              | 1.760552255              |                                                                                                                                                |              |             |              | 2.1                                                                                                                                                                                                                                                                                            | 0.133550181  |
| ASD   | 2.11              | 1.932818675              |                                                                                                                                                |              |             |              |                                                                                                                                                                                                                                                                                                |              |
| ASD   | 2.11              | 2.595862962              |                                                                                                                                                |              |             |              |                                                                                                                                                                                                                                                                                                |              |
| ASD   | 2.11              | 3.365695231              |                                                                                                                                                |              |             |              |                                                                                                                                                                                                                                                                                                |              |

|     |      |             |
|-----|------|-------------|
| ASD | 2.11 | 3.590261744 |
| ASD | 2.11 | 4.105028244 |
| ASD | 2.11 | 4.652653031 |
| ASD | 2.11 | 7.336691931 |
| ASD | 2.11 | 8.579041071 |
| ASD | 2.2  | 0.383731536 |
| ASD | 2.2  | 1.133225705 |
| ASD | 2.2  | 1.909490027 |
| ASD | 2.2  | 3.842345749 |
| ASD | 2.2  | 3.848045799 |
| ASD | 2.2  | 3.92455407  |
| ASD | 2.2  | 4.01154422  |
| ASD | 2.3  | 1.753805439 |
| ASD | 2.3  | 1.76626794  |
| ASD | 2.3  | 1.768342674 |
| ASD | 2.3  | 1.775403517 |
| ASD | 2.3  | 1.934150894 |
| ASD | 2.3  | 1.951543423 |
| ASD | 2.3  | 1.969422452 |
| ASD | 2.3  | 1.975056921 |
| ASD | 2.3  | 2.32311893  |
| ASD | 2.3  | 2.840479095 |
| ASD | 2.3  | 2.916988897 |
| ASD | 2.3  | 3.070233725 |
| ASD | 2.3  | 3.506979659 |
| ASD | 2.4  | 1.182039351 |
| ASD | 2.4  | 1.433945643 |
| ASD | 2.4  | 1.769037947 |
| ASD | 2.4  | 1.770056576 |
| ASD | 2.4  | 1.777827079 |
| ASD | 2.4  | 1.799120598 |
| ASD | 2.4  | 2.436815482 |
| ASD | 2.4  | 2.49150978  |
| ASD | 2.4  | 3.041442528 |
| ASD | 2.4  | 1.589790419 |
| ASD | 2.5  | 0.888687275 |
| ASD | 2.5  | 1.696395082 |
| ASD | 2.5  | 1.924532332 |
| ASD | 2.5  | 1.933812387 |
| ASD | 2.5  | 1.934680137 |
| ASD | 2.5  | 2.234722289 |
| ASD | 2.5  | 2.462285846 |
| ASD | 2.5  | 2.565051084 |
| ASD | 2.5  | 2.826727351 |
| ASD | 2.5  | 3.132576088 |
| ASD | 2.5  | 3.706315006 |
| ASD | 2.6  | 1.542560885 |
| ASD | 2.6  | 1.595070732 |
| ASD | 2.6  | 1.753531106 |
| ASD | 2.6  | 1.780306071 |
| ASD | 2.6  | 1.805664947 |
| ASD | 2.6  | 1.894824741 |
| ASD | 2.6  | 1.909931041 |
| ASD | 2.6  | 1.955851225 |
| ASD | 2.6  | 3.133341616 |
| ASD | 2.6  | 3.173000092 |
| ASD | 2.6  | 3.229318281 |
| ASD | 2.6  | 3.257407069 |
| ASD | 2.6  | 3.455729425 |
| ASD | 2.6  | 3.796997905 |
| ASD | 2.6  | 3.883443524 |
| ASD | 2.6  | 3.891048426 |
| ASD | 2.7  | 1.730023456 |
| ASD | 2.7  | 1.7549687   |
| ASD | 2.7  | 1.768088582 |
| ASD | 2.7  | 1.907207444 |
| ASD | 2.7  | 2.988800014 |
| ASD | 2.7  | 4.382687517 |
| ASD | 2.8  | 1.944459197 |
| ASD | 2.8  | 2.286573842 |
| ASD | 2.8  | 2.662176127 |
| ASD | 2.8  | 2.818519699 |
| ASD | 2.8  | 3.087934721 |

|  |      |              |
|--|------|--------------|
|  | 2.11 | -0.75185922  |
|  | 2.11 | -0.653970516 |
|  | 2.11 | -0.277202098 |
|  | 2.11 | 0.160247543  |
|  | 2.11 | 0.287855263  |
|  | 2.11 | 0.580366281  |
|  | 2.11 | 0.891548699  |
|  | 2.11 | 3.863399312  |
|  | 2.11 | 5.139408564  |
|  | 2.2  | -3.277944053 |
|  | 2.2  | -2.508143147 |
|  | 2.2  | -1.71084678  |
|  | 2.2  | 0.274377586  |
|  | 2.2  | 0.280232072  |
|  | 2.2  | 0.358813252  |
|  | 2.2  | 0.448160307  |
|  | 2.3  | -1.870749474 |
|  | 2.3  | -1.857949314 |
|  | 2.3  | -1.855818368 |
|  | 2.3  | -1.848566219 |
|  | 2.3  | -1.685517752 |
|  | 2.3  | -1.667653992 |
|  | 2.3  | -1.64929055  |
|  | 2.3  | -1.643503421 |
|  | 2.3  | -1.286011047 |
|  | 2.3  | -0.754633566 |
|  | 2.3  | -0.676050813 |
|  | 2.3  | -0.518653982 |
|  | 2.3  | -0.070074887 |
|  | 2.4  | -2.458006948 |
|  | 2.4  | -2.317962595 |
|  | 2.4  | -1.771870471 |
|  | 2.4  | -1.770210436 |
|  | 2.4  | -1.757547028 |
|  | 2.4  | -1.722845476 |
|  | 2.4  | -0.683608975 |
|  | 2.4  | -0.59447495  |
|  | 2.4  | 0.301737642  |
|  | 2.4  | -2.063985994 |
|  | 2.5  | -3.206557459 |
|  | 2.5  | -1.890254857 |
|  | 2.5  | -1.518464894 |
|  | 2.5  | -1.503341403 |
|  | 2.5  | -1.501927253 |
|  | 2.5  | -1.012955545 |
|  | 2.5  | -0.642100515 |
|  | 2.5  | -0.474626401 |
|  | 2.5  | -0.048178683 |
|  | 2.5  | 0.450255882  |
|  | 2.5  | 1.385264835  |
|  | 2.6  | -2.140954864 |
|  | 2.6  | -2.05538079  |
|  | 2.6  | -1.797141609 |
|  | 2.6  | -1.753507072 |
|  | 2.6  | -1.712180303 |
|  | 2.6  | -1.566878663 |
|  | 2.6  | -1.542260277 |
|  | 2.6  | -1.338984049 |
|  | 2.6  | 0.28453038   |
|  | 2.6  | 0.339211174  |
|  | 2.6  | 0.416862246  |
|  | 2.6  | 0.455590845  |
|  | 2.6  | 0.729036139  |
|  | 2.6  | 1.199574417  |
|  | 2.6  | 1.318764953  |
|  | 2.6  | 1.329250532  |
|  | 2.7  | -1.650353588 |
|  | 2.7  | -1.615959283 |
|  | 2.7  | -1.597869694 |
|  | 2.7  | -1.406053708 |
|  | 2.7  | 0.085237564  |
|  | 2.7  | 2.007118617  |
|  | 2.8  | -0.10017412  |

|     |     |             |
|-----|-----|-------------|
| ASD | 2.8 | 3.439633355 |
| ASD | 2.8 | 3.463212465 |
| ASD | 2.8 | 4.314469988 |
| ASD | 2.8 | 1.941287967 |
| ASD | 2.9 | 0.877654367 |
| ASD | 2.9 | 2.942514612 |
| ASD | 2.9 | 2.982310828 |
| ASD | 2.9 | 3.120210965 |
| ASD | 2.9 | 3.316236645 |
| ASD | 2.9 | 3.393061275 |
| ASD | 2.9 | 3.492670981 |
| ASD | 2.9 | 3.881833807 |
| ASD | 3   | 0.279977415 |
| ASD | 3   | 1.69775407  |
| ASD | 3   | 1.812554288 |
| ASD | 3   | 1.889455816 |
| ASD | 3   | 1.913101432 |
| ASD | 3   | 1.920273411 |
| ASD | 3   | 1.926564964 |
| ASD | 3   | 1.933868368 |
| ASD | 3   | 1.950875952 |
| ASD | 3   | 1.997979799 |
| ASD | 3   | 2.223934968 |
| ASD | 3   | 2.229050172 |
| ASD | 3   | 2.270732445 |
| ASD | 3   | 2.286069299 |
| ASD | 3   | 2.299678108 |
| ASD | 3   | 2.309151491 |
| ASD | 3   | 2.31924965  |
| ASD | 3   | 2.33338209  |
| ASD | 3   | 2.341143345 |
| ASD | 3   | 2.371425274 |
| ASD | 3   | 2.394555312 |
| ASD | 3   | 2.467509714 |
| ASD | 3   | 2.467827638 |
| ASD | 3   | 2.527927329 |
| ASD | 3   | 2.56099319  |
| ASD | 3   | 2.564178516 |
| ASD | 3   | 2.637520547 |
| ASD | 3   | 2.708135421 |
| ASD | 3   | 2.742380266 |
| ASD | 3   | 2.787423827 |
| ASD | 3   | 2.848511835 |
| ASD | 3   | 2.8500213   |
| ASD | 3   | 2.911394328 |
| ASD | 3   | 2.939101215 |
| ASD | 3   | 2.991209577 |
| ASD | 3   | 3.000061778 |
| ASD | 3   | 3.031294504 |
| ASD | 3   | 3.070955957 |
| ASD | 3   | 3.106337428 |
| ASD | 3   | 3.123236602 |
| ASD | 3   | 3.126485594 |
| ASD | 3   | 3.126938398 |
| ASD | 3   | 3.138201396 |
| ASD | 3   | 3.151239691 |
| ASD | 3   | 3.151762784 |
| ASD | 3   | 3.169147412 |
| ASD | 3   | 3.171847353 |
| ASD | 3   | 3.178289885 |
| ASD | 3   | 3.184085483 |
| ASD | 3   | 3.210379784 |
| ASD | 3   | 3.21554402  |
| ASD | 3   | 3.239719974 |
| ASD | 3   | 3.247677172 |
| ASD | 3   | 3.261283661 |
| ASD | 3   | 3.374584772 |
| ASD | 3   | 3.593280436 |
| ASD | 3   | 3.701827615 |
| ASD | 3   | 3.79121394  |
| ASD | 3   | 3.840372734 |
| ASD | 3   | 3.857447748 |
| ASD | 3   | 3.862951135 |

|     |              |
|-----|--------------|
| 2.8 | 0.094461381  |
| 2.8 | 0.308148635  |
| 2.8 | 0.397095454  |
| 2.8 | 0.550370763  |
| 2.8 | 0.750458777  |
| 2.8 | 0.763873379  |
| 2.8 | 1.248169907  |
| 2.8 | -0.707099593 |
| 2.9 | 0.467638509  |
| 2.9 | 0.49027933   |
| 2.9 | 0.56873333   |
| 2.9 | 0.680256052  |
| 2.9 | 0.723963039  |
| 2.9 | 0.780632887  |
| 2.9 | 1.002034989  |
| 2.9 | -1.047129332 |
| 3   | -0.240529339 |
| 3   | -0.175217321 |
| 3   | -0.131466585 |
| 3   | -0.118014147 |
| 3   | -0.113933872 |
| 3   | -0.110354488 |
| 3   | -0.106199443 |
| 3   | -0.096523507 |
| 3   | -0.069725236 |
| 3   | 0.058824939  |
| 3   | 0.061735076  |
| 3   | 0.08544891   |
| 3   | 0.094174337  |
| 3   | 0.101916646  |
| 3   | 0.107306233  |
| 3   | 0.113051267  |
| 3   | 0.12109148   |
| 3   | 0.125507005  |
| 3   | 0.142734967  |
| 3   | 0.155894084  |
| 3   | 0.197399226  |
| 3   | 0.197580099  |
| 3   | 0.231771951  |
| 3   | 0.250583745  |
| 3   | 0.252395938  |
| 3   | 0.294121608  |
| 3   | 0.334295748  |
| 3   | 0.353778289  |
| 3   | 0.379404423  |
| 3   | 0.414158548  |
| 3   | 0.415017312  |
| 3   | 0.44993359   |
| 3   | 0.465696563  |
| 3   | 0.495341996  |
| 3   | 0.500378181  |
| 3   | 0.51814707   |
| 3   | 0.540711222  |
| 3   | 0.560840412  |
| 3   | 0.570454671  |
| 3   | 0.572303084  |
| 3   | 0.572560693  |
| 3   | 0.578968426  |
| 3   | 0.586386159  |
| 3   | 0.586683757  |
| 3   | 0.596574201  |
| 3   | 0.598110249  |
| 3   | 0.601775527  |
| 3   | 0.605072753  |
| 3   | 0.620032079  |
| 3   | 0.62297011   |
| 3   | 0.636724268  |
| 3   | 0.641251269  |
| 3   | 0.648992258  |
| 3   | 0.713451406  |
| 3   | 0.837871511  |
| 3   | 0.899626058  |
| 3   | 0.950479631  |

|     |      |             |
|-----|------|-------------|
| ASD | 3    | 4.059955801 |
| ASD | 3    | 4.082409176 |
| ASD | 3    | 4.487520725 |
| ASD | 3    | 4.534095578 |
| ASD | 3    | 5.216815777 |
| ASD | 3    | 6.424577698 |
| ASD | 3    | 7.567975879 |
| ASD | 3    | 35.20182233 |
| ASD | 3    | 74.50182128 |
| ASD | 3    | 75.18150939 |
| ASD | 3    | 3.83856486  |
| ASD | 3    | 2.361848916 |
| ASD | 3    | 2.804906202 |
| ASD | 3.1  | 1.81196642  |
| ASD | 3.1  | 1.919248295 |
| ASD | 3.1  | 1.946590662 |
| ASD | 3.1  | 2.520507102 |
| ASD | 3.1  | 2.60568842  |
| ASD | 3.1  | 2.745487178 |
| ASD | 3.1  | 2.890265814 |
| ASD | 3.1  | 3.09071153  |
| ASD | 3.1  | 3.118491282 |
| ASD | 3.1  | 3.197441022 |
| ASD | 3.1  | 3.278552373 |
| ASD | 3.1  | 3.323930805 |
| ASD | 3.1  | 3.608764132 |
| ASD | 3.1  | 3.838865067 |
| ASD | 3.1  | 4.052126446 |
| ASD | 3.1  | 4.506350716 |
| ASD | 3.1  | 4.627806452 |
| ASD | 3.1  | 5.527089849 |
| ASD | 3.11 | 1.96369789  |
| ASD | 3.11 | 2.748162871 |
| ASD | 3.11 | 3.16029941  |
| ASD | 3.11 | 3.198023138 |
| ASD | 3.11 | 3.20527259  |
| ASD | 3.2  | 1.768679159 |
| ASD | 3.2  | 1.943362231 |
| ASD | 3.2  | 1.983581142 |
| ASD | 3.2  | 2.363642804 |
| ASD | 3.2  | 2.539922116 |
| ASD | 3.2  | 2.598746116 |
| ASD | 3.2  | 3.164256994 |
| ASD | 3.2  | 3.210737954 |
| ASD | 3.2  | 3.279339373 |
| ASD | 3.3  | 1.934280644 |
| ASD | 3.3  | 1.941640937 |
| ASD | 3.3  | 2.487486511 |
| ASD | 3.3  | 2.60935582  |
| ASD | 3.3  | 3.075803846 |
| ASD | 3.3  | 3.096434177 |
| ASD | 3.3  | 3.101869839 |
| ASD | 3.3  | 3.451008802 |
| ASD | 3.3  | 3.804556807 |
| ASD | 3.3  | 74.50746036 |
| ASD | 3.3  | 4.236998373 |
| ASD | 3.4  | 1.933723539 |
| ASD | 3.4  | 1.938343257 |
| ASD | 3.4  | 1.956556514 |
| ASD | 3.4  | 2.192294526 |
| ASD | 3.4  | 2.913807573 |
| ASD | 3.4  | 3.053603751 |
| ASD | 3.4  | 3.17858098  |
| ASD | 3.4  | 3.305120786 |
| ASD | 3.4  | 4.359049422 |
| ASD | 3.4  | 5.035086088 |
| ASD | 3.4  | 5.83902245  |
| ASD | 3.4  | 24.3037751  |
| ASD | NA   | NA          |
| ASD | 3.5  | 1.895846749 |
| ASD | 3.5  | 2.209360626 |
| ASD | 3.5  | 2.216254316 |
| ASD | 3.5  | 2.318769604 |

|      |              |
|------|--------------|
| 3    | 0.978447     |
| 3    | 0.988161299  |
| 3    | 0.991292279  |
| 3    | 1.103371965  |
| 3    | 1.116146116  |
| 3    | 1.346621749  |
| 3    | 1.373119065  |
| 3    | 1.761531517  |
| 3    | 2.448650149  |
| 3    | 3.09915103   |
| 3    | 18.82056966  |
| 3    | 41.17908341  |
| 3    | 41.56577085  |
| 3    | 0.977418466  |
| 3    | 0.137286796  |
| 3    | 0.389350478  |
| 3    | -0.175551771 |
| 3.1  | -0.388449805 |
| 3.1  | -0.381025991 |
| 3.1  | -0.225200085 |
| 3.1  | -0.202072231 |
| 3.1  | -0.164115019 |
| 3.1  | -0.124805704 |
| 3.1  | -0.07038204  |
| 3.1  | -0.06283947  |
| 3.1  | -0.041403571 |
| 3.1  | -0.019380766 |
| 3.1  | -0.007059922 |
| 3.1  | 0.070276094  |
| 3.1  | 0.132751542  |
| 3.1  | 0.190654828  |
| 3.1  | 0.313982726  |
| 3.1  | 0.346959565  |
| 3.1  | 0.591126903  |
| 3.1  | -0.376381152 |
| 3.11 | -0.163388533 |
| 3.11 | -0.05148801  |
| 3.11 | -0.041245519 |
| 3.11 | -0.039277197 |
| 3.11 | -0.429331318 |
| 3.2  | -0.381902553 |
| 3.2  | -0.370982586 |
| 3.2  | -0.267790817 |
| 3.2  | -0.219928652 |
| 3.2  | -0.203957158 |
| 3.2  | -0.050413474 |
| 3.2  | -0.037793278 |
| 3.2  | -0.019167086 |
| 3.2  | -0.384368324 |
| 3.3  | -0.382369907 |
| 3.3  | -0.234165613 |
| 3.3  | -0.201076483 |
| 3.3  | -0.074429674 |
| 3.3  | -0.068828266 |
| 3.3  | -0.067352412 |
| 3.3  | 0.027443435  |
| 3.3  | 0.123436396  |
| 3.3  | 19.32021001  |
| 3.3  | 0.240850001  |
| 3.3  | -0.384519585 |
| 3.4  | -0.383265271 |
| 3.4  | -0.37832013  |
| 3.4  | -0.314314142 |
| 3.4  | -0.118413805 |
| 3.4  | -0.080457293 |
| 3.4  | -0.046524322 |
| 3.4  | -0.012167091 |
| 3.4  | 0.273988476  |
| 3.4  | 0.457541374  |
| 3.4  | 0.675820731  |
| 3.4  | 5.689245338  |
| 3.4  | -0.909551106 |
| #N/A | -0.394803635 |

|     |     |             |
|-----|-----|-------------|
| ASD | 3.5 | 2.744250223 |
| ASD | 3.5 | 2.882668987 |
| ASD | 3.5 | 3.017441442 |
| ASD | 3.5 | 3.096684458 |
| ASD | 3.5 | 3.410058613 |
| ASD | 3.5 | 3.507703419 |
| ASD | 3.5 | 4.535534332 |
| ASD | 3.5 | 3.529253396 |
| ASD | 3.5 | 3.23655577  |
| ASD | 3.5 | 4.998632021 |
| ASD | 3.6 | 1.207454398 |
| ASD | 3.6 | 1.742759764 |
| ASD | 3.6 | 1.927048457 |
| ASD | 3.6 | 1.969323331 |
| ASD | 3.6 | 2.143323705 |
| ASD | 3.6 | 2.192883566 |
| ASD | 3.6 | 2.840810277 |
| ASD | 3.6 | 3.096037241 |
| ASD | 3.6 | 3.168660132 |
| ASD | 3.6 | 3.214450603 |
| ASD | 3.6 | 3.222052733 |
| ASD | 3.6 | 3.252706558 |
| ASD | 3.6 | 3.369225631 |
| ASD | 3.6 | 3.547595603 |
| ASD | 3.6 | 3.637206167 |
| ASD | 3.6 | 4.446765011 |
| ASD | 3.6 | 7.651386954 |
| ASD | 3.6 | 19.29436512 |
| ASD | 3.7 | 1.956541995 |
| ASD | 3.7 | 2.133283344 |
| ASD | 3.7 | 3.191617548 |
| ASD | 3.7 | 3.941842874 |
| ASD | 3.7 | 3.21015624  |
| ASD | 3.8 | 1.541628728 |
| ASD | 3.8 | 1.898962602 |
| ASD | 3.8 | 1.900327471 |
| ASD | 3.8 | 1.921673248 |
| ASD | 3.8 | 1.990897744 |
| ASD | 3.8 | 3.266606311 |
| ASD | 3.8 | 3.605452329 |
| ASD | 3.8 | 5.509052411 |
| ASD | 3.9 | 2.775393272 |
| ASD | 3.9 | 3.144986565 |
| ASD | 3.9 | 3.172212144 |
| ASD | 3.9 | 3.584215189 |
| ASD | 4   | 1.516799172 |
| ASD | 4   | 1.785683206 |
| ASD | 4   | 1.905511501 |
| ASD | 4   | 1.917625405 |
| ASD | 4   | 1.939374654 |
| ASD | 4   | 2.583980213 |
| ASD | 4   | 2.808818765 |
| ASD | 4   | 2.828250607 |
| ASD | 4   | 2.874990738 |
| ASD | 4   | 2.894112109 |
| ASD | 4   | 2.896783213 |
| ASD | 4   | 2.928880847 |
| ASD | 4   | 2.951404219 |
| ASD | 4   | 2.962363052 |
| ASD | 4   | 3.015745786 |
| ASD | 4   | 3.049568282 |
| ASD | 4   | 3.060910422 |
| ASD | 4   | 3.106395269 |
| ASD | 4   | 3.107602552 |
| ASD | 4   | 3.11622259  |
| ASD | 4   | 3.142433897 |
| ASD | 4   | 3.146042939 |
| ASD | 4   | 3.156012917 |
| ASD | 4   | 3.164336284 |
| ASD | 4   | 3.164406248 |
| ASD | 4   | 3.200357181 |
| ASD | 4   | 3.219918917 |
| ASD | 4   | 3.245195319 |

|     |              |
|-----|--------------|
| 3.5 | -0.30968047  |
| 3.5 | -0.307808742 |
| 3.5 | -0.279974485 |
| 3.5 | -0.164450868 |
| 3.5 | -0.126868343 |
| 3.5 | -0.090275839 |
| 3.5 | -0.068760311 |
| 3.5 | 0.016324917  |
| 3.5 | 0.042836774  |
| 3.5 | 0.321906463  |
| 3.5 | 0.048687878  |
| 3.5 | -0.0307834   |
| 3.5 | 0.447643612  |
| 3.5 | -0.581711264 |
| 3.6 | -0.436368776 |
| 3.6 | -0.386331958 |
| 3.6 | -0.374853771 |
| 3.6 | -0.327610367 |
| 3.6 | -0.314154209 |
| 3.6 | -0.138233536 |
| 3.6 | -0.068936039 |
| 3.6 | -0.049217964 |
| 3.6 | -0.036785245 |
| 3.6 | -0.034721166 |
| 3.6 | -0.026398247 |
| 3.6 | 0.005238223  |
| 3.6 | 0.053668029  |
| 3.6 | 0.077998483  |
| 3.6 | 0.297804418  |
| 3.6 | 1.167901669  |
| 3.6 | 4.329124262  |
| 3.6 | -0.378324072 |
| 3.7 | -0.330336458 |
| 3.7 | -0.042984721 |
| 3.7 | 0.160711379  |
| 3.7 | -0.037951222 |
| 3.7 | -0.490978513 |
| 3.8 | -0.393957639 |
| 3.8 | -0.393587059 |
| 3.8 | -0.387791398 |
| 3.8 | -0.368996032 |
| 3.8 | -0.02262428  |
| 3.8 | 0.069376896  |
| 3.8 | 0.5862295    |
| 3.8 | -0.155995118 |
| 3.9 | -0.05564565  |
| 3.9 | -0.048253546 |
| 3.9 | 0.063610732  |
| 3.9 | -0.497720066 |
| 4   | -0.245195548 |
| 4   | -0.231541839 |
| 4   | -0.230161533 |
| 4   | -0.227683337 |
| 4   | -0.154234435 |
| 4   | -0.128615442 |
| 4   | -0.126401301 |
| 4   | -0.121075546 |
| 4   | -0.118896782 |
| 4   | -0.118592425 |
| 4   | -0.114935094 |
| 4   | -0.112368692 |
| 4   | -0.11112     |
| 4   | -0.10503736  |
| 4   | -0.101183491 |
| 4   | -0.099891123 |
| 4   | -0.0947084   |
| 4   | -0.094570837 |
| 4   | -0.093588636 |
| 4   | -0.090602016 |
| 4   | -0.090190788 |
| 4   | -0.089054769 |
| 4   | -0.088106372 |
| 4   | -0.0880984   |

|     |      |             |
|-----|------|-------------|
| ASD | 4    | 3.268677026 |
| ASD | 4    | 3.271522795 |
| ASD | 4    | 3.446844121 |
| ASD | 4    | 3.454767068 |
| ASD | 4    | 3.48379157  |
| ASD | 4    | 3.485865047 |
| ASD | 4    | 3.502400422 |
| ASD | 4    | 3.505979883 |
| ASD | 4    | 3.50662005  |
| ASD | 4    | 3.508200266 |
| ASD | 4    | 3.509413673 |
| ASD | 4    | 3.539420615 |
| ASD | 4    | 3.604044499 |
| ASD | 4    | 3.656568636 |
| ASD | 4    | 3.695917457 |
| ASD | 4    | 3.69665372  |
| ASD | 4    | 3.736931543 |
| ASD | 4    | 3.748703736 |
| ASD | 4    | 3.762359505 |
| ASD | 4    | 3.854609633 |
| ASD | 4    | 3.857403626 |
| ASD | 4    | 3.866259649 |
| ASD | 4    | 3.884929354 |
| ASD | 4    | 3.8870907   |
| ASD | 4    | 3.894784801 |
| ASD | 4    | 3.90374767  |
| ASD | 4    | 3.904236823 |
| ASD | 4    | 3.941916704 |
| ASD | 4    | 3.948995286 |
| ASD | 4    | 3.968496449 |
| ASD | 4    | 4.006113527 |
| ASD | 4    | 4.03045939  |
| ASD | 4    | 4.052926006 |
| ASD | 4    | 4.260344084 |
| ASD | 4    | 4.392902141 |
| ASD | 4    | 4.545397326 |
| ASD | 4    | 7.449149512 |
| ASD | 4    | 32.46347539 |
| ASD | 4    | 38.89401951 |
| ASD | 4    | 74.95307332 |
| ASD | 4    | 2.538694282 |
| ASD | 4    | 6.536994144 |
| ASD | 4.1  | 1.914915159 |
| ASD | 4.1  | 2.416535323 |
| ASD | 4.1  | 2.717381167 |
| ASD | 4.1  | 3.12748412  |
| ASD | 4.1  | 3.303567752 |
| ASD | 4.1  | 3.507126704 |
| ASD | 4.1  | 3.509649523 |
| ASD | 4.1  | 3.926358763 |
| ASD | 4.1  | 4.442499019 |
| ASD | 4.1  | 4.939970364 |
| ASD | 4.11 | 2.425418807 |
| ASD | 4.11 | 4.34664516  |
| ASD | 4.2  | 2.592301545 |
| ASD | 4.2  | 3.159355867 |
| ASD | 4.2  | 3.642307254 |
| ASD | 4.2  | 38.81686877 |
| ASD | 4.3  | 3.442366431 |
| ASD | 4.3  | 4.622827423 |
| ASD | 4.3  | 4.633477966 |
| ASD | 4.4  | 1.967474488 |
| ASD | 4.4  | 2.856673934 |
| ASD | 4.4  | 3.035825385 |
| ASD | 4.4  | 3.193763485 |
| ASD | 4.4  | 3.238747026 |
| ASD | 4.4  | 3.541462297 |
| ASD | 4.4  | 6.683604158 |
| ASD | 4.5  | 1.953855654 |
| ASD | 4.5  | 2.871454683 |
| ASD | 4.5  | 3.148883569 |
| ASD | 4.5  | 3.163115123 |
| ASD | 4.5  | 3.563787892 |

|      |              |
|------|--------------|
| 4    | -0.084002009 |
| 4    | -0.081773067 |
| 4    | -0.078892974 |
| 4    | -0.076217376 |
| 4    | -0.075893118 |
| 4    | -0.055916313 |
| 4    | -0.055013542 |
| 4    | -0.051706375 |
| 4    | -0.051470115 |
| 4    | -0.049586009 |
| 4    | -0.049178151 |
| 4    | -0.049105208 |
| 4    | -0.048925152 |
| 4    | -0.048786892 |
| 4    | -0.045367782 |
| 4    | -0.038004282 |
| 4    | -0.032019474 |
| 4    | -0.027535914 |
| 4    | -0.027452021 |
| 4    | -0.022862607 |
| 4    | -0.021521237 |
| 4    | -0.019965245 |
| 4    | -0.009453901 |
| 4    | -0.009135542 |
| 4    | -0.008126452 |
| 4    | -0.005999152 |
| 4    | -0.00575288  |
| 4    | -0.004876183 |
| 4    | -0.003854919 |
| 4    | -0.003799183 |
| 4    | 0.000494212  |
| 4    | 0.001300773  |
| 4    | 0.003522813  |
| 4    | 0.007809051  |
| 4    | 0.010583115  |
| 4    | 0.01314305   |
| 4    | 0.036777085  |
| 4    | 0.051881273  |
| 4    | 0.069257177  |
| 4    | 0.400122168  |
| 4    | 3.250353239  |
| 4    | 3.983074831  |
| 4    | 8.091785818  |
| 4    | -0.159394492 |
| 4    | 0.296187583  |
| 4    | -0.230470349 |
| 4.1  | -0.173313767 |
| 4.1  | -0.139034203 |
| 4.1  | -0.092305453 |
| 4.1  | -0.072241789 |
| 4.1  | -0.049047478 |
| 4.1  | -0.048760018 |
| 4.1  | -0.001278522 |
| 4.1  | 0.057532537  |
| 4.1  | 0.114216387  |
| 4.1  | -0.172301547 |
| 4.11 | 0.04661057   |
| 4.11 | -0.153286269 |
| 4.2  | -0.08867386  |
| 4.2  | -0.033644472 |
| 4.2  | 3.97428397   |
| 4.2  | -0.056426519 |
| 4.3  | 0.078079868  |
| 4.3  | 0.079293433  |
| 4.3  | -0.224481531 |
| 4.4  | -0.123162635 |
| 4.4  | -0.102749411 |
| 4.4  | -0.084753321 |
| 4.4  | -0.079627718 |
| 4.4  | -0.045135145 |
| 4.4  | 0.312892907  |
| 4.4  | -0.226033315 |
| 4.5  | -0.121478458 |

|     |     |             |
|-----|-----|-------------|
| ASD | 4.5 | 3.877853287 |
| ASD | 4.5 | 35.44180349 |
| ASD | 4.6 | 1.77914161  |
| ASD | 4.6 | 1.91777999  |
| ASD | 4.6 | 2.246008078 |
| ASD | 4.6 | 2.253682405 |
| ASD | 4.6 | 2.571636227 |
| ASD | 4.6 | 2.894389207 |
| ASD | 4.6 | 3.171074902 |
| ASD | 4.6 | 3.197841793 |
| ASD | 4.6 | 3.421052873 |
| ASD | 4.6 | 3.881919153 |
| ASD | 4.6 | 3.921649419 |
| ASD | 4.6 | 4.434641946 |
| ASD | 4.6 | 4.560724522 |
| ASD | 4.6 | 5.446421772 |
| ASD | 4.7 | 2.76586097  |
| ASD | 4.7 | 3.171948458 |
| ASD | 4.7 | 3.514299815 |
| ASD | 4.7 | 4.004544917 |
| ASD | 4.7 | 4.312426208 |
| ASD | 4.7 | 4.43252312  |
| ASD | 4.8 | 1.947499474 |
| ASD | 4.8 | 2.928194181 |
| ASD | 4.8 | 3.008897624 |
| ASD | 4.8 | 3.154879858 |
| ASD | 4.8 | 35.83761821 |
| ASD | 4.8 | 60.78189105 |
| ASD | 4.9 | 3.175334796 |
| ASD | 4.9 | 3.205025991 |
| ASD | 4.9 | 3.224372069 |
| ASD | 4.9 | 3.610643335 |
| ASD | 4.9 | 35.86581601 |
| ASD | 5   | 0.596219535 |
| ASD | 5   | 1.896391166 |
| ASD | 5   | 1.959437666 |
| ASD | 5   | 1.976318541 |
| ASD | 5   | 2.462145201 |
| ASD | 5   | 2.794508055 |
| ASD | 5   | 2.864472002 |
| ASD | 5   | 2.934937802 |
| ASD | 5   | 3.020900927 |
| ASD | 5   | 3.059915929 |
| ASD | 5   | 3.105404913 |
| ASD | 5   | 3.110157284 |
| ASD | 5   | 3.112182448 |
| ASD | 5   | 3.127294486 |
| ASD | 5   | 3.148039671 |
| ASD | 5   | 3.151270529 |
| ASD | 5   | 3.16173743  |
| ASD | 5   | 3.182378302 |
| ASD | 5   | 3.261124248 |
| ASD | 5   | 3.29382733  |
| ASD | 5   | 3.399293979 |
| ASD | 5   | 3.441914275 |
| ASD | 5   | 3.49941154  |
| ASD | 5   | 3.506688283 |
| ASD | 5   | 3.515329895 |
| ASD | 5   | 3.547691601 |
| ASD | 5   | 3.549632244 |
| ASD | 5   | 3.572612897 |
| ASD | 5   | 3.595689168 |
| ASD | 5   | 3.779197025 |
| ASD | 5   | 3.818177784 |
| ASD | 5   | 3.819973599 |
| ASD | 5   | 3.862152868 |
| ASD | 5   | 3.883641124 |
| ASD | 5   | 3.91473145  |
| ASD | 5   | 3.925294448 |
| ASD | 5   | 3.942685591 |
| ASD | 5   | 3.942725362 |
| ASD | 5   | 3.951369087 |
| ASD | 5   | 3.978396073 |

|     |              |
|-----|--------------|
| 4.5 | -0.089867115 |
| 4.5 | -0.088245516 |
| 4.5 | -0.042591278 |
| 4.5 | -0.006805427 |
| 4.5 | 3.589715704  |
| 4.5 | -0.245940923 |
| 4.6 | -0.230143919 |
| 4.6 | -0.192744314 |
| 4.6 | -0.191869871 |
| 4.6 | -0.155640957 |
| 4.6 | -0.118865208 |
| 4.6 | -0.087338547 |
| 4.6 | -0.084288622 |
| 4.6 | -0.05885507  |
| 4.6 | -0.006342146 |
| 4.6 | -0.001815123 |
| 4.6 | 0.056637272  |
| 4.6 | 0.071003618  |
| 4.6 | 0.17192346   |
| 4.6 | -0.133510223 |
| 4.7 | -0.087239011 |
| 4.7 | -0.048230145 |
| 4.7 | 0.007630318  |
| 4.7 | 0.042711528  |
| 4.7 | 0.056395844  |
| 4.7 | -0.226757563 |
| 4.8 | -0.115013336 |
| 4.8 | -0.105817667 |
| 4.8 | -0.089183874 |
| 4.8 | 3.634816396  |
| 4.8 | 6.477065348  |
| 4.8 | -0.086853158 |
| 4.9 | -0.083470026 |
| 4.9 | -0.081265658 |
| 4.9 | -0.037252384 |
| 4.9 | 3.638029365  |
| 4.9 | -0.380727736 |
| 5   | -0.169602923 |
| 5   | -0.165298632 |
| 5   | -0.164146146 |
| 5   | -0.130977943 |
| 5   | -0.108286971 |
| 5   | -0.103510415 |
| 5   | -0.098699596 |
| 5   | -0.092830749 |
| 5   | -0.090167129 |
| 5   | -0.08706152  |
| 5   | -0.086737067 |
| 5   | -0.086598806 |
| 5   | -0.085567082 |
| 5   | -0.084150773 |
| 5   | -0.083930197 |
| 5   | -0.083215604 |
| 5   | -0.081806417 |
| 5   | -0.076430298 |
| 5   | -0.074197604 |
| 5   | -0.066997218 |
| 5   | -0.064087459 |
| 5   | -0.060162024 |
| 5   | -0.059665228 |
| 5   | -0.059075251 |
| 5   | -0.056865863 |
| 5   | -0.056733372 |
| 5   | -0.055164444 |
| 5   | -0.053588988 |
| 5   | -0.041060598 |
| 5   | -0.038399316 |
| 5   | -0.038276713 |
| 5   | -0.035397063 |
| 5   | -0.033930024 |
| 5   | -0.031807435 |
| 5   | -0.031086281 |
| 5   | -0.029898958 |

|     |      |             |
|-----|------|-------------|
| ASD | 5    | 3.980449515 |
| ASD | 5    | 3.990521366 |
| ASD | 5    | 4.062746077 |
| ASD | 5    | 4.09104081  |
| ASD | 5    | 4.097595106 |
| ASD | 5    | 4.098930165 |
| ASD | 5    | 4.128283643 |
| ASD | 5    | 4.209646052 |
| ASD | 5    | 4.226430792 |
| ASD | 5    | 4.303735446 |
| ASD | 5    | 4.311478042 |
| ASD | 5    | 4.323371089 |
| ASD | 5    | 4.34148578  |
| ASD | 5    | 4.435156751 |
| ASD | 5    | 4.572449972 |
| ASD | 5    | 4.644733569 |
| ASD | 5    | 4.800262349 |
| ASD | 5    | 5.299074806 |
| ASD | 5    | 5.336832233 |
| ASD | 5    | 5.904067911 |
| ASD | 5    | 6.247313172 |
| ASD | 5    | 6.31383267  |
| ASD | 5    | 7.30005601  |
| ASD | 5    | 7.486531168 |
| ASD | 5    | 8.391948432 |
| ASD | 5    | 12.13523977 |
| ASD | 5    | 49.77907686 |
| ASD | 5    | NA          |
| ASD | 5.1  | 2.277648889 |
| ASD | 5.1  | 3.154331213 |
| ASD | 5.1  | 3.284288518 |
| ASD | 5.1  | 3.502208806 |
| ASD | 5.1  | 3.544946338 |
| ASD | 5.1  | 3.680441208 |
| ASD | 5.1  | 3.849203546 |
| ASD | 5.1  | 4.329762376 |
| ASD | 5.1  | 4.424795695 |
| ASD | 5.11 | 35.78969413 |
| ASD | 5.2  | 3.161723479 |
| ASD | 5.3  | 2.553816865 |
| ASD | 5.3  | 3.158974039 |
| ASD | 5.4  | 2.311897707 |
| ASD | 5.4  | 3.086706186 |
| ASD | 5.4  | 3.113725136 |
| ASD | 5.4  | 3.139439464 |
| ASD | 5.4  | 3.139442416 |
| ASD | 5.4  | 3.164240228 |
| ASD | 5.4  | 3.253584368 |
| ASD | 5.4  | 3.72447975  |
| ASD | 5.4  | 3.843385013 |
| ASD | 5.5  | 1.937405529 |
| ASD | 5.5  | 2.392122697 |
| ASD | 5.5  | 3.419012802 |
| ASD | 5.5  | 3.699880744 |
| ASD | 5.5  | 3.846176017 |
| ASD | 5.5  | 3.877681047 |
| ASD | 5.5  | 3.970955503 |
| ASD | 5.5  | 4.364505416 |
| ASD | 5.5  | 81.12677535 |
| ASD | 5.6  | 2.819520302 |
| ASD | 5.6  | 3.06161274  |
| ASD | 5.6  | 3.089442243 |
| ASD | 5.6  | 3.722578831 |
| ASD | 5.6  | 3.824743139 |
| ASD | 5.6  | 6.217986375 |
| ASD | 5.6  | 49.19357181 |
| ASD | 5.6  | 3.750129384 |
| ASD | 5.7  | 3.313765906 |
| ASD | 5.7  | 6.114021167 |
| ASD | 5.7  | 6.445977204 |
| ASD | 5.7  | 47.91228205 |
| ASD | 5.8  | 1.989875685 |
| ASD | 5.8  | 4.503350218 |

|      |              |
|------|--------------|
| 5    | -0.029896243 |
| 5    | -0.029306122 |
| 5    | -0.027460944 |
| 5    | -0.027320752 |
| 5    | -0.02663313  |
| 5    | -0.021702227 |
| 5    | -0.019770498 |
| 5    | -0.019323025 |
| 5    | -0.019231878 |
| 5    | -0.017227867 |
| 5    | -0.011673118 |
| 5    | -0.010527196 |
| 5    | -0.005249477 |
| 5    | -0.004720877 |
| 5    | -0.003908919 |
| 5    | -0.002672198 |
| 5    | 0.003722877  |
| 5    | 0.013096116  |
| 5    | 0.018031039  |
| 5    | 0.02864925   |
| 5    | 0.062704016  |
| 5    | 0.065281779  |
| 5    | 0.104007914  |
| 5    | 0.127441845  |
| 5    | 0.131983243  |
| 5    | 0.199314371  |
| 5    | 0.212045344  |
| 5    | 0.273859704  |
| 5    | 0.529420503  |
| 5    | 3.099428618  |
| 5    | -0.299072739 |
| 5    | -0.143573816 |
| 5.1  | -0.083721239 |
| 5.1  | -0.074848835 |
| 5.1  | -0.05997105  |
| 5.1  | -0.057053287 |
| 5.1  | -0.047802824 |
| 5.1  | -0.036281135 |
| 5.1  | -0.003472575 |
| 5.1  | 0.00301551   |
| 5.1  | 2.144349914  |
| 5.11 | -0.083216556 |
| 5.2  | -0.124719364 |
| 5.3  | -0.083404265 |
| 5.3  | -0.141235592 |
| 5.4  | -0.088338113 |
| 5.4  | -0.086493484 |
| 5.4  | -0.084737923 |
| 5.4  | -0.084737722 |
| 5.4  | -0.083044734 |
| 5.4  | -0.076945059 |
| 5.4  | -0.044796238 |
| 5.4  | -0.036678376 |
| 5.4  | -0.166802803 |
| 5.5  | -0.135758497 |
| 5.5  | -0.065650981 |
| 5.5  | -0.046475654 |
| 5.5  | -0.036487829 |
| 5.5  | -0.034336928 |
| 5.5  | -0.027968924 |
| 5.5  | -0.001100609 |
| 5.5  | 5.239588754  |
| 5.5  | -0.106579343 |
| 5.6  | -0.090051285 |
| 5.6  | -0.088151318 |
| 5.6  | -0.044926017 |
| 5.6  | -0.037951088 |
| 5.6  | 0.125439656  |
| 5.6  | 3.059455203  |
| 5.6  | -0.043045095 |
| 5.6  | -0.072836364 |
| 5.7  | 0.118341776  |
| 5.7  | 0.141004973  |

|     |     |             |
|-----|-----|-------------|
| ASD | 5.8 | 5.495925978 |
| ASD | 5.8 | 7.350306138 |
| ASD | 5.9 | 3.159007073 |
| ASD | 5.9 | 3.928064749 |
| ASD | 5.9 | 4.310695518 |
| ASD | 5.9 | 4.412568244 |
| ASD | 5.9 | 35.36158295 |
| ASD | 5.9 | 6.759678058 |
| ASD | 6   | 2.666106919 |
| ASD | 6   | 3.295334597 |
| ASD | 6   | 3.406344498 |
| ASD | 6   | 3.483469223 |
| ASD | 6   | 3.504049088 |
| ASD | 6   | 3.618499752 |
| ASD | 6   | 3.761570923 |
| ASD | 6   | 3.885215511 |
| ASD | 6   | 3.896482309 |
| ASD | 6   | 3.929361929 |
| ASD | 6   | 3.93688859  |
| ASD | 6   | 3.998605189 |
| ASD | 6   | 4.025840682 |
| ASD | 6   | 4.096265741 |
| ASD | 6   | 4.139033319 |
| ASD | 6   | 4.489461645 |
| ASD | 6   | 5.153894208 |
| ASD | 6   | 5.351578996 |
| ASD | 6   | 5.376237735 |
| ASD | 6   | 5.663571469 |
| ASD | 6   | 6.056527048 |
| ASD | 6   | 6.279743552 |
| ASD | 6   | 6.448335245 |
| ASD | 6   | 6.559986666 |
| ASD | 6   | 6.561354175 |
| ASD | 6   | 6.580830999 |
| ASD | 6   | 8.503086552 |
| ASD | 6   | 27.32293703 |
| ASD | 6   | 35.29367074 |
| ASD | 6   | 62.97000766 |
| ASD | 6   | 4.360557438 |
| ASD | 6   | 4.590533386 |
| ASD | 6.1 | 4.10420053  |
| ASD | 6.1 | 5.441069648 |
| ASD | 6.1 | 7.361217931 |
| ASD | 6.2 | 3.49537467  |
| ASD | 6.3 | 1.888797564 |
| ASD | 6.4 | 3.490909865 |
| ASD | 6.4 | 3.513936023 |
| ASD | 6.4 | 3.982458219 |
| ASD | 6.4 | 7.312564574 |
| ASD | 6.4 | 34.53119898 |
| ASD | 6.5 | 1.935325183 |
| ASD | 6.5 | 2.544073701 |
| ASD | 6.5 | 3.831359513 |
| ASD | 6.5 | 4.40434619  |
| ASD | 6.5 | 4.788232304 |
| ASD | 6.5 | 5.448442876 |
| ASD | 6.5 | 6.052291706 |
| ASD | 6.5 | 6.582149733 |
| ASD | 6.5 | 10.87918557 |
| ASD | 6.5 | 4.580985444 |
| ASD | 6.6 | 2.70633251  |
| ASD | 6.6 | 2.833821597 |
| ASD | 6.6 | 3.849587917 |
| ASD | 6.6 | 4.174854231 |
| ASD | 6.6 | 5.338114798 |
| ASD | 6.6 | 6.789393798 |
| ASD | 6.6 | 4.803423069 |
| ASD | 6.7 | 2.949096226 |
| ASD | 6.7 | 3.165363801 |
| ASD | 6.8 | 3.278596972 |
| ASD | 6.8 | 7.336787656 |
| ASD | 6.9 | 2.789810923 |
| ASD | 6.9 | 3.883492303 |

|     |              |
|-----|--------------|
| 5.7 | 2.971979394  |
| 5.7 | -0.163220577 |
| 5.8 | 0.008378559  |
| 5.8 | 0.076143377  |
| 5.8 | 0.202745031  |
| 5.8 | -0.08340201  |
| 5.9 | -0.030897148 |
| 5.9 | -0.004774301 |
| 5.9 | 0.002180721  |
| 5.9 | 2.115122044  |
| 5.9 | 0.162421858  |
| 5.9 | -0.117053133 |
| 6   | -0.168953511 |
| 6   | -0.16246795  |
| 6   | -0.157962072 |
| 6   | -0.156759729 |
| 6   | -0.150073148 |
| 6   | -0.141714463 |
| 6   | -0.134490743 |
| 6   | -0.133832499 |
| 6   | -0.131911565 |
| 6   | -0.131471833 |
| 6   | -0.127866147 |
| 6   | -0.126274961 |
| 6   | -0.122160499 |
| 6   | -0.119661878 |
| 6   | -0.099188711 |
| 6   | -0.060370391 |
| 6   | -0.048821001 |
| 6   | -0.047380357 |
| 6   | -0.030593382 |
| 6   | -0.007635634 |
| 6   | 0.005405403  |
| 6   | 0.01525508   |
| 6   | 0.02177812   |
| 6   | 0.021858015  |
| 6   | 0.022995914  |
| 6   | 0.135300359  |
| 6   | 1.234817461  |
| 6   | 1.700493746  |
| 6   | 3.317435698  |
| 6   | -0.106719715 |
| 6   | -0.09328377  |
| 6   | -0.121684098 |
| 6.1 | -0.043592665 |
| 6.1 | 0.068588666  |
| 6.1 | -0.157266517 |
| 6.2 | -0.251127996 |
| 6.3 | -0.157527366 |
| 6.4 | -0.156182102 |
| 6.4 | -0.128809506 |
| 6.4 | 0.065746178  |
| 6.4 | 1.655947656  |
| 6.4 | -0.248409701 |
| 6.5 | -0.212844625 |
| 6.5 | -0.137637186 |
| 6.5 | -0.104161434 |
| 6.5 | -0.081733554 |
| 6.5 | -0.043161897 |
| 6.5 | -0.007883077 |
| 6.5 | 0.023072959  |
| 6.5 | 0.27411982   |
| 6.5 | -0.093841592 |
| 6.5 | -0.203364936 |
| 6.6 | -0.195916607 |
| 6.6 | -0.136572223 |
| 6.6 | -0.117569103 |
| 6.6 | -0.049607623 |
| 6.6 | 0.035180834  |
| 6.6 | -0.080846059 |
| 6.6 | -0.189181887 |
| 6.7 | -0.176546829 |
| 6.7 | -0.169931378 |

|     |     |             |
|-----|-----|-------------|
| ASD | 6.9 | 5.723994717 |
| ASD | 7   | 2.357432785 |
| ASD | 7   | 2.59132726  |
| ASD | 7   | 2.634127165 |
| ASD | 7   | 3.153278609 |
| ASD | 7   | 3.222452899 |
| ASD | 7   | 3.412128066 |
| ASD | 7   | 3.508745379 |
| ASD | 7   | 3.597351534 |
| ASD | 7   | 3.604812299 |
| ASD | 7   | 3.746512202 |
| ASD | 7   | 3.796403522 |
| ASD | 7   | 3.865268305 |
| ASD | 7   | 3.914408433 |
| ASD | 7   | 3.955667203 |
| ASD | 7   | 4.271622131 |
| ASD | 7   | 4.425494281 |
| ASD | 7   | 4.494372775 |
| ASD | 7   | 4.541691254 |
| ASD | 7   | 4.798957611 |
| ASD | 7   | 5.303493954 |
| ASD | 7   | 6.446539387 |
| ASD | 7   | 6.485826135 |
| ASD | 7   | 7.480051592 |
| ASD | 7   | 26.49278743 |
| ASD | 7   | 27.26330227 |
| ASD | 7   | 27.30473237 |
| ASD | 7   | 35.51019672 |
| ASD | 7   | 46.31172495 |
| ASD | 7   | 47.12925687 |
| ASD | 7   | 47.37459511 |
| ASD | 7   | 74.16103107 |
| ASD | 7   | 3.388650594 |
| ASD | 7.1 | 2.483420178 |
| ASD | 7.1 | 3.016962749 |
| ASD | 7.3 | 3.886542529 |
| ASD | 7.5 | 2.591688069 |
| ASD | 7.6 | 3.800559998 |
| ASD | 7.6 | 29.30662249 |
| ASD | 7.7 | 1.946405071 |
| ASD | 7.8 | 2.305071823 |
| ASD | 8   | 2.932530666 |
| ASD | 8   | 3.110017026 |
| ASD | 8   | 3.134013449 |
| ASD | 8   | 3.161605693 |
| ASD | 8   | 3.323140162 |
| ASD | 8   | 3.534150253 |
| ASD | 8   | 3.795128401 |
| ASD | 8   | 3.883004325 |
| ASD | 8   | 3.895459721 |
| ASD | 8   | 4.020820066 |
| ASD | 8   | 4.33892372  |
| ASD | 8   | 5.383623749 |
| ASD | 8   | 5.603725523 |
| ASD | 8   | 5.776427031 |
| ASD | 8   | 6.317129835 |
| ASD | 8   | 6.593434297 |
| ASD | 8   | 6.747454517 |
| ASD | 8   | 7.308318518 |
| ASD | 8   | 7.401654691 |
| ASD | 8   | 7.420372799 |
| ASD | 8   | 7.429260261 |
| ASD | 8   | 46.80186197 |
| ASD | 8   | 5.831308082 |
| ASD | 8.1 | 7.6725621   |
| ASD | 8.6 | 7.624448828 |
| ASD | 8.7 | 6.461969227 |
| ASD | 8.8 | 8.380741477 |
| ASD | 8.9 | 3.395127853 |
| ASD | 8.9 | 3.85793594  |
| ASD | 9   | 2.317607616 |
| ASD | 9   | 2.318238246 |
| ASD | 9   | 2.757757857 |

|     |              |
|-----|--------------|
| 6.8 | 0.06716137   |
| 6.8 | -0.198487855 |
| 6.9 | -0.134591418 |
| 6.9 | -0.027063259 |
| 6.9 | -0.223748797 |
| 7   | -0.197323267 |
| 7   | -0.194979307 |
| 7   | -0.166547692 |
| 7   | -0.162759324 |
| 7   | -0.152371659 |
| 7   | -0.147080359 |
| 7   | -0.142227794 |
| 7   | -0.141819201 |
| 7   | -0.134058928 |
| 7   | -0.131326602 |
| 7   | -0.127555184 |
| 7   | -0.124863998 |
| 7   | -0.122604439 |
| 7   | -0.105300993 |
| 7   | -0.0968741   |
| 7   | -0.093101931 |
| 7   | -0.090510509 |
| 7   | -0.076421175 |
| 7   | -0.048789964 |
| 7   | 0.013809549  |
| 7   | 0.015961109  |
| 7   | 0.070410414  |
| 7   | 1.111653369  |
| 7   | 1.153851038  |
| 7   | 1.156119981  |
| 7   | 1.605496757  |
| 7   | 2.197048402  |
| 7   | 2.241820989  |
| 7   | 2.255257072  |
| 7   | 3.722230997  |
| 7   | -0.153657416 |
| 7   | -0.203232858 |
| 7.1 | -0.174013105 |
| 7.1 | -0.126390089 |
| 7.3 | -0.197303507 |
| 7.5 | -0.13109897  |
| 7.6 | 1.265754596  |
| 7.6 | -0.232642786 |
| 7.7 | -0.213000204 |
| 7.8 | -0.178637075 |
| 8   | -0.264288873 |
| 8   | -0.254225741 |
| 8   | -0.25286519  |
| 8   | -0.251300763 |
| 8   | -0.242142073 |
| 8   | -0.230178211 |
| 8   | -0.215381257 |
| 8   | -0.210398862 |
| 8   | -0.209692666 |
| 8   | -0.202584978 |
| 8   | -0.184549118 |
| 8   | -0.125316656 |
| 8   | -0.112837313 |
| 8   | -0.103045473 |
| 8   | -0.072388675 |
| 8   | -0.056722748 |
| 8   | -0.047990101 |
| 8   | -0.016190202 |
| 8   | -0.010898222 |
| 8   | -0.009836942 |
| 8   | -0.00933304  |
| 8   | 2.22301699   |
| 8   | -0.099933824 |
| 8.1 | 0.004461702  |
| 8.6 | 0.001733773  |
| 8.7 | -0.064176563 |
| 8.8 | 0.044614097  |
| 8.9 | -0.238060511 |

|     |      |             |
|-----|------|-------------|
| ASD | 9    | 3.123784629 |
| ASD | 9    | 3.191205179 |
| ASD | 9    | 5.328972004 |
| ASD | 9    | 6.125345238 |
| ASD | 9    | 6.467657387 |
| ASD | 9    | 7.276952792 |
| ASD | 9    | 8.375038236 |
| ASD | 9    | 14.82855893 |
| ASD | 9    | 38.56855634 |
| ASD | 9    | 74.35987823 |
| ASD | 9    | 4.524931417 |
| ASD | 9.3  | 2.814870832 |
| ASD | 9.4  | 7.304087304 |
| ASD | 9.5  | 38.83830565 |
| ASD | 9.6  | 4.318045379 |
| ASD | 9.6  | 5.624045253 |
| ASD | 9.6  | 38.40106647 |
| ASD | 9.6  | 62.7889812  |
| ASD | 10   | 3.507261311 |
| ASD | 10   | 6.594135011 |
| ASD | 10   | 6.762039259 |
| ASD | 10   | 7.477493897 |
| ASD | 10   | 7.599466667 |
| ASD | 10   | 8.386173576 |
| ASD | 10   | 35.76497811 |
| ASD | 10   | 6.154322714 |
| ASD | 10.2 | 7.191490546 |
| ASD | 10.4 | 6.817935564 |
| ASD | 11   | 6.155717835 |
| ASD | 11   | 8.478001133 |
| ASD | 11   | 8.512100264 |
| ASD | 11   | 8.716706671 |
| ASD | 11   | 31.56978476 |
| ASD | 11   | 35.38261884 |
| ASD | 11.5 | 38.67202818 |
| ASD | 11.6 | 8.566768542 |
| ASD | 12   | 4.303707215 |
| ASD | 12   | 7.078332018 |
| ASD | 12   | 8.509371944 |
| ASD | 12   | 8.610645778 |
| ASD | 13   | 4.290428899 |
| ASD | 13   | 7.499890968 |
| ASD | 14   | 7.409953676 |
| ASD | 14   | 52.32369453 |
| ASD | 14   | 54.19111691 |
| ASD | 17   | 35.14317583 |
| ASD | 18   | 47.94773459 |
| ASD | 19   | 7.353418484 |
| NT  | 0.11 | 0.533876112 |
| NT  | 1    | 1.244406305 |
| NT  | 1    | 1.785678762 |
| NT  | 1    | 68.48959386 |
| NT  | 1.1  | 1.904358452 |
| NT  | 1.1  | 1.926215641 |
| NT  | 1.1  | 2.723521588 |
| NT  | 1.2  | 0.437254446 |
| NT  | 1.2  | 1.609050579 |
| NT  | 1.3  | 0.875468793 |
| NT  | 1.3  | 1.764913468 |
| NT  | 1.3  | 4.383914265 |
| NT  | 1.3  | 4.73428875  |
| NT  | 1.5  | 1.773930851 |
| NT  | 1.5  | 3.021694126 |
| NT  | 1.6  | 0.225241531 |
| NT  | 1.7  | 2.558296738 |
| NT  | 1.8  | 1.940088158 |
| NT  | 1.8  | 2.69417618  |
| NT  | 2    | 1.802291752 |
| NT  | 2    | 1.916475321 |
| NT  | 2    | 1.927718431 |
| NT  | 2    | 1.930603539 |
| NT  | 2    | 1.968570376 |
| NT  | 2    | 2.00462387  |

|      |              |
|------|--------------|
| 8.9  | -0.211820191 |
| 9    | -0.280818353 |
| 9    | -0.280779015 |
| 9    | -0.253362222 |
| 9    | -0.23052984  |
| 9    | -0.226324214 |
| 9    | -0.092972465 |
| 9    | -0.043295502 |
| 9    | -0.021942414 |
| 9    | 0.028540621  |
| 9    | 0.097038089  |
| 9    | 0.499602231  |
| 9    | 1.980479437  |
| 9    | -0.425388389 |
| 9    | -0.14312771  |
| 9.3  | -0.249799572 |
| 9.4  | 0.030233244  |
| 9.5  | 1.997306129  |
| 9.6  | -0.156033053 |
| 9.6  | -0.074566092 |
| 9.6  | 1.970031587  |
| 9.6  | -0.425388389 |
| 10   | -1.689564916 |
| 10   | -0.477611201 |
| 10   | -0.411689431 |
| 10   | -0.130791024 |
| 10   | -0.082902653 |
| 10   | 0.225970483  |
| 10   | 10.9753069   |
| 10   | -0.65028822  |
| 10.2 | -0.243080303 |
| 10.4 | -0.389743689 |
| 11   | -0.722724981 |
| 11   | -0.550788057 |
| 11   | -0.54826343  |
| 11   | -0.533114806 |
| 11   | 1.15887857   |
| 11   | 1.44117271   |
| 11.5 | 1.684713593  |
| 11.6 | -0.544215907 |
| 12   | -0.719308467 |
| 12   | -0.497932284 |
| 12   | -0.383755349 |
| 12   | -0.375675116 |
| 13   | -0.72036789  |
| 13   | -0.464297787 |
| 14   | -0.471473523 |
| 14   | 3.112013683  |
| 14   | 3.261007824  |
| 17   | 1.741249018  |
| 18   | 2.762873395  |
| 19   | -0.475984239 |

|    |      |             |
|----|------|-------------|
| NT | 2    | 2.894188968 |
| NT | 2    | 3.011604701 |
| NT | 2    | 3.09348605  |
| NT | 2    | 3.370727229 |
| NT | 2    | 3.573430667 |
| NT | 2    | 3.640511612 |
| NT | 2    | 3.794523823 |
| NT | 2    | 3.926908401 |
| NT | 2    | 4.539290752 |
| NT | 2    | 38.91952638 |
| NT | 2.1  | 2.123642879 |
| NT | 2.1  | 2.450220386 |
| NT | 2.1  | 4.48688387  |
| NT | 2.11 | 3.083688531 |
| NT | 2.11 | 4.485241542 |
| NT | 2.2  | 1.773548738 |
| NT | 2.2  | 6.747663416 |
| NT | 2.3  | 1.898999795 |
| NT | 2.3  | 3.575206026 |
| NT | 2.4  | 3.595334729 |
| NT | 2.5  | 1.947471468 |
| NT | 2.5  | 3.116107379 |
| NT | 2.6  | 2.856290688 |
| NT | 2.7  | 2.171690062 |
| NT | 2.7  | 2.234890908 |
| NT | 2.8  | 2.926979552 |
| NT | 2.8  | 2.956886945 |
| NT | 2.8  | 3.96726386  |
| NT | 2.9  | 1.939770175 |
| NT | 2.9  | 2.120537216 |
| NT | 2.9  | 3.465408541 |
| NT | 2.9  | 3.774797305 |
| NT | 2.9  | 3.95020403  |
| NT | 2.9  | 6.450540684 |
| NT | 3    | 0.377826796 |
| NT | 3    | 1.824284114 |
| NT | 3    | 1.961698974 |
| NT | 3    | 2.137636724 |
| NT | 3    | 2.492011984 |
| NT | 3    | 2.572670693 |
| NT | 3    | 2.769971304 |
| NT | 3    | 3.098932323 |
| NT | 3    | 3.15361811  |
| NT | 3    | 3.167651931 |
| NT | 3    | 3.236924353 |
| NT | 3    | 3.261732787 |
| NT | 3    | 3.301943511 |
| NT | 3    | 3.640047714 |
| NT | 3    | 3.691994583 |
| NT | 3    | 3.769852338 |
| NT | 3    | 3.877041072 |
| NT | 3    | 3.96430516  |
| NT | 3    | 4.263707514 |
| NT | 3    | 4.280934647 |
| NT | 3    | 4.319455935 |
| NT | 3    | 4.352751109 |
| NT | 3    | 4.395606078 |
| NT | 3    | 4.515759575 |
| NT | 3    | 4.904170632 |
| NT | 3    | 5.252478488 |
| NT | 3    | 5.546847984 |
| NT | 3    | 5.776309565 |
| NT | 3    | 6.566344306 |
| NT | 3    | 6.60513629  |
| NT | 3    | 6.795485713 |
| NT | 3    | 6.949182436 |
| NT | 3    | 8.423214816 |
| NT | 3    | 11.76847551 |
| NT | 3    | 74.8685423  |
| NT | 3    | 1.948320635 |
| NT | 3    | 3.587889103 |
| NT | 3.1  | 1.245208373 |
| NT | 3.1  | 1.933497847 |

|    |      |             |
|----|------|-------------|
| NT | 3.1  | 2.331238031 |
| NT | 3.1  | 3.349932934 |
| NT | 3.1  | 4.492395793 |
| NT | 3.11 | 4.002659778 |
| NT | 3.11 | 62.6083836  |
| NT | 3.2  | 2.2017919   |
| NT | 3.2  | 3.542524228 |
| NT | 3.2  | 6.327465698 |
| NT | 3.3  | 3.354333599 |
| NT | 3.3  | 3.737872988 |
| NT | 3.4  | 2.191095663 |
| NT | 3.4  | 2.403486411 |
| NT | 3.5  | 3.176157179 |
| NT | 3.5  | 3.674623157 |
| NT | 3.5  | 3.729098498 |
| NT | 3.5  | 3.863118668 |
| NT | 3.5  | 4.013171598 |
| NT | 3.5  | 52.14014418 |
| NT | 3.6  | 3.988985859 |
| NT | 3.6  | 22.85844216 |
| NT | 3.7  | 1.956676533 |
| NT | 3.7  | 2.488558769 |
| NT | 3.7  | 3.062405003 |
| NT | 3.7  | 3.21963121  |
| NT | 3.7  | 4.121153521 |
| NT | 3.8  | 2.180745684 |
| NT | 3.8  | 3.578295693 |
| NT | 3.9  | 1.804770965 |
| NT | 3.9  | 1.969185866 |
| NT | 3.9  | 3.13980416  |
| NT | 3.9  | 4.017326708 |
| NT | 4    | 1.97518754  |
| NT | 4    | 2.155281343 |
| NT | 4    | 2.312532534 |
| NT | 4    | 2.369955901 |
| NT | 4    | 3.001632142 |
| NT | 4    | 3.035910229 |
| NT | 4    | 3.162297562 |
| NT | 4    | 3.165910577 |
| NT | 4    | 3.209253803 |
| NT | 4    | 3.268787247 |
| NT | 4    | 3.330264295 |
| NT | 4    | 3.334068127 |
| NT | 4    | 3.446656781 |
| NT | 4    | 3.449996278 |
| NT | 4    | 3.453196764 |
| NT | 4    | 3.500549273 |
| NT | 4    | 3.538178541 |
| NT | 4    | 3.549589742 |
| NT | 4    | 3.560902866 |
| NT | 4    | 3.576465419 |
| NT | 4    | 3.595601079 |
| NT | 4    | 3.663242355 |
| NT | 4    | 3.727917468 |
| NT | 4    | 3.919293816 |
| NT | 4    | 3.931256002 |
| NT | 4    | 3.934049957 |
| NT | 4    | 3.942381628 |
| NT | 4    | 4.03955931  |
| NT | 4    | 4.04155467  |
| NT | 4    | 4.182377597 |
| NT | 4    | 4.305044762 |
| NT | 4    | 4.320458772 |
| NT | 4    | 4.336846167 |
| NT | 4    | 4.568312784 |
| NT | 4    | 4.761193131 |
| NT | 4    | 5.319044143 |
| NT | 4    | 5.360238492 |
| NT | 4    | 5.460635416 |
| NT | 4    | 5.911139101 |
| NT | 4    | 6.00018324  |
| NT | 4    | 6.325710133 |
| NT | 4    | 6.393501289 |

|    |      |             |
|----|------|-------------|
| NT | 4    | 6.46400138  |
| NT | 4    | 6.539415531 |
| NT | 4    | 6.542432331 |
| NT | 4    | 6.77397484  |
| NT | 4    | 7.381714843 |
| NT | 4    | 7.642111227 |
| NT | 4    | 26.83158226 |
| NT | 4    | 31.18423432 |
| NT | 4    | 31.93567471 |
| NT | 4    | 32.77252145 |
| NT | 4    | 34.94060116 |
| NT | 4    | 42.65409714 |
| NT | 4.11 | 3.530142893 |
| NT | 4.2  | 40.49379522 |
| NT | 4.3  | 2.531207666 |
| NT | 4.4  | 3.081995469 |
| NT | 4.5  | 3.855618992 |
| NT | 4.5  | 4.558662497 |
| NT | 4.6  | 3.729066908 |
| NT | 4.6  | 3.941108805 |
| NT | 4.8  | 8.198543519 |
| NT | 5    | 1.779374799 |
| NT | 5    | 1.960054005 |
| NT | 5    | 2.23192553  |
| NT | 5    | 2.274562796 |
| NT | 5    | 2.318702236 |
| NT | 5    | 2.529072717 |
| NT | 5    | 2.59340738  |
| NT | 5    | 2.720803256 |
| NT | 5    | 3.545759516 |
| NT | 5    | 3.551165591 |
| NT | 5    | 3.566991558 |
| NT | 5    | 3.753826963 |
| NT | 5    | 3.779157468 |
| NT | 5    | 3.835106653 |
| NT | 5    | 3.838940274 |
| NT | 5    | 3.843121613 |
| NT | 5    | 3.855016116 |
| NT | 5    | 3.884759476 |
| NT | 5    | 3.885291206 |
| NT | 5    | 3.929529776 |
| NT | 5    | 3.957240167 |
| NT | 5    | 3.986315841 |
| NT | 5    | 4.120403337 |
| NT | 5    | 4.225559412 |
| NT | 5    | 4.303574183 |
| NT | 5    | 4.457678686 |
| NT | 5    | 4.474272206 |
| NT | 5    | 4.513108152 |
| NT | 5    | 4.567099875 |
| NT | 5    | 5.280376621 |
| NT | 5    | 6.099407285 |
| NT | 5    | 6.107140258 |
| NT | 5    | 6.315563351 |
| NT | 5    | 6.44383876  |
| NT | 5    | 6.537914693 |
| NT | 5    | 6.566197895 |
| NT | 5    | 7.189236011 |
| NT | 5    | 7.344994649 |
| NT | 5    | 7.407147057 |
| NT | 5    | 7.498388872 |
| NT | 5    | 7.519505322 |
| NT | 5    | 7.744149044 |
| NT | 5    | 7.774069093 |
| NT | 5    | 34.91505537 |
| NT | 5    | 34.99903204 |
| NT | 5    | 35.20352845 |
| NT | 5    | 42.79600634 |
| NT | 5    | 61.22160375 |
| NT | 5    | 67.92561226 |
| NT | 5.1  | 3.438383316 |
| NT | 5.1  | 3.586860816 |
| NT | 5.1  | 3.653374915 |

|    |      |             |
|----|------|-------------|
| NT | 5.1  | 3.719629387 |
| NT | 5.1  | 4.06150803  |
| NT | 5.1  | 6.589319445 |
| NT | 5.1  | 7.576136485 |
| NT | 5.11 | 57.3894909  |
| NT | 5.3  | 3.807884693 |
| NT | 5.4  | 5.576240718 |
| NT | 5.4  | 62.56624103 |
| NT | 5.5  | 3.509460691 |
| NT | 5.5  | 27.16703516 |
| NT | 5.6  | 2.553116535 |
| NT | 5.6  | 7.493157342 |
| NT | 5.6  | 38.61759573 |
| NT | 5.7  | 5.913600937 |
| NT | 5.8  | 42.68576851 |
| NT | 5.9  | 31.83459243 |
| NT | 6    | 0.486279997 |
| NT | 6    | 3.15604235  |
| NT | 6    | 3.309690128 |
| NT | 6    | 3.354013935 |
| NT | 6    | 3.502078725 |
| NT | 6    | 3.532104532 |
| NT | 6    | 3.58487343  |
| NT | 6    | 3.699030104 |
| NT | 6    | 3.715537553 |
| NT | 6    | 3.73593047  |
| NT | 6    | 3.948203666 |
| NT | 6    | 3.950219825 |
| NT | 6    | 3.995464588 |
| NT | 6    | 4.001797477 |
| NT | 6    | 4.117739655 |
| NT | 6    | 4.344349908 |
| NT | 6    | 4.374739226 |
| NT | 6    | 4.453845091 |
| NT | 6    | 4.768686704 |
| NT | 6    | 5.328547433 |
| NT | 6    | 5.429568201 |
| NT | 6    | 5.491458021 |
| NT | 6    | 6.106683865 |
| NT | 6    | 6.25036563  |
| NT | 6    | 6.415077552 |
| NT | 6    | 6.499116704 |
| NT | 6    | 6.671043731 |
| NT | 6    | 6.682326384 |
| NT | 6    | 7.058818936 |
| NT | 6    | 7.162552673 |
| NT | 6    | 7.244620018 |
| NT | 6    | 7.360554837 |
| NT | 6    | 7.42443613  |
| NT | 6    | 7.544490479 |
| NT | 6    | 7.607961401 |
| NT | 6    | 26.81040175 |
| NT | 6    | 31.16697593 |
| NT | 6    | 31.68879889 |
| NT | 6    | 34.90814565 |
| NT | 6    | 38.39183072 |
| NT | 6    | 38.92448997 |
| NT | 6    | 43.26228207 |
| NT | 6    | 47.34735973 |
| NT | 6    | 35.47001575 |
| NT | 6.1  | 3.765263552 |
| NT | 6.1  | 4.023228779 |
| NT | 6.1  | 7.412595868 |
| NT | 6.1  | 8.784032546 |
| NT | 6.1  | 47.95186661 |
| NT | 6.11 | 3.446768507 |
| NT | 6.11 | 4.046571968 |
| NT | 6.11 | 5.103651352 |
| NT | 6.11 | 6.584584005 |
| NT | 6.2  | 5.285838753 |
| NT | 6.3  | 4.009606101 |
| NT | 6.3  | 4.856508374 |
| NT | 6.3  | 6.148170888 |

|    |      |             |
|----|------|-------------|
| NT | 6.3  | 6.226273403 |
| NT | 6.3  | 28.25573952 |
| NT | 6.3  | 82.16958302 |
| NT | 6.4  | 6.503220096 |
| NT | 6.4  | 7.180370361 |
| NT | 6.5  | 23.52753642 |
| NT | 6.5  | 52.54075468 |
| NT | 6.6  | 3.145264802 |
| NT | 6.6  | 3.540997232 |
| NT | 6.6  | 5.519839016 |
| NT | 6.6  | 6.781930033 |
| NT | 6.6  | 8.404903509 |
| NT | 6.6  | 52.70533599 |
| NT | 6.7  | 63.07433881 |
| NT | 6.8  | 4.78792916  |
| NT | 7    | 3.131669355 |
| NT | 7    | 3.82147599  |
| NT | 7    | 3.962634784 |
| NT | 7    | 4.003436729 |
| NT | 7    | 4.437029396 |
| NT | 7    | 4.578022629 |
| NT | 7    | 4.624758559 |
| NT | 7    | 4.790863365 |
| NT | 7    | 5.243742332 |
| NT | 7    | 5.569822319 |
| NT | 7    | 5.887372568 |
| NT | 7    | 6.263387211 |
| NT | 7    | 6.413942993 |
| NT | 7    | 6.676628213 |
| NT | 7    | 7.677997641 |
| NT | 7    | 7.678637169 |
| NT | 7.1  | 3.763747563 |
| NT | 7.2  | 53.84473443 |
| NT | 7.3  | 3.132457415 |
| NT | 7.3  | 3.422572571 |
| NT | 7.3  | 31.56373563 |
| NT | 7.4  | 43.13162628 |
| NT | 7.4  | 57.62435235 |
| NT | 7.5  | 3.112055426 |
| NT | 7.5  | 6.822186589 |
| NT | 7.5  | 7.409681    |
| NT | 7.5  | 7.695746616 |
| NT | 7.5  | 62.74466619 |
| NT | 7.6  | 3.15945105  |
| NT | 7.6  | 6.194381803 |
| NT | 7.6  | 7.247949436 |
| NT | 7.6  | 35.97218405 |
| NT | 7.8  | 47.3497697  |
| NT | 8    | 3.953659018 |
| NT | 8    | 3.991396    |
| NT | 8    | 4.17714576  |
| NT | 8    | 4.558316827 |
| NT | 8    | 4.669973622 |
| NT | 8    | 5.401487619 |
| NT | 8    | 5.94328694  |
| NT | 8    | 6.221544012 |
| NT | 8    | 8.270407736 |
| NT | 8    | 8.567906357 |
| NT | 8    | 38.62195185 |
| NT | 8    | 38.76929824 |
| NT | 8    | 62.63769113 |
| NT | 8.11 | 7.771798279 |
| NT | 8.2  | 47.74887018 |
| NT | 8.3  | 3.822458744 |
| NT | 8.3  | 9.630596191 |
| NT | 8.3  | 35.42342876 |
| NT | 8.4  | 6.724911198 |
| NT | 8.4  | 27.3035804  |
| NT | 8.4  | 35.62927192 |
| NT | 8.5  | 5.718995713 |
| NT | 8.5  | 47.47516915 |
| NT | 8.6  | 2.297761204 |
| NT | 8.6  | 7.415941283 |

|          |      |             |
|----------|------|-------------|
| NT       | 8.6  | 8.429633021 |
| NT       | 8.6  | 35.42397942 |
| NT       | 8.8  | 6.422391549 |
| NT       | 9    | 4.032637601 |
| NT       | 9    | 4.44376656  |
| NT       | 9    | 6.264302731 |
| NT       | 9    | 7.374531351 |
| NT       | 9    | 8.313376736 |
| NT       | 9    | 8.451855559 |
| NT       | 9    | 8.501022313 |
| NT       | 9.1  | 31.8006908  |
| NT       | 9.4  | 4.817738314 |
| NT       | 9.6  | 3.354520847 |
| NT       | 9.6  | 57.06053339 |
| NT       | 9.7  | 3.856545771 |
| NT       | 10   | 4.343403948 |
| NT       | 10   | 4.470079993 |
| NT       | 10   | 6.462623708 |
| NT       | 10   | 6.6969634   |
| NT       | 10   | 7.324179351 |
| NT       | 10   | 7.640650049 |
| NT       | 10   | 7.810621612 |
| NT       | 10   | 8.456500515 |
| NT       | 10   | 8.524332032 |
| NT       | 10   | 8.622698203 |
| NT       | 10   | 8.641267918 |
| NT       | 10   | 8.857038129 |
| NT       | 10   | 8.986138605 |
| NT       | 10   | 14.05543176 |
| NT       | 10.1 | 3.207058276 |
| NT       | 11   | 8.880952284 |
| NT       | 12   | 5.513352126 |
| NT       | 12   | 8.393864058 |
| NT       | 12   | 15.91727522 |
| NT       | 12   | 35.7308249  |
| NT       | 12   | 38.67477627 |
| NT       | 12   | 23.84917989 |
| NT       | 14   | 13.31918075 |
| NT       | 15   | 6.639530703 |
| NT-adult | 16   | 6.62644159  |
| NT-adult | 16   | 10.3384876  |
| NT-adult | 16   | 14.81856329 |
| NT-adult | 18   | 35.22878225 |
| NT-adult | 18   | 35.27905016 |
| NT-adult | 20   | 5.115192011 |
| NT-adult | 20   | 7.595294051 |
| NT-adult | 20   | 15.23135571 |
| NT-adult | 20   | 17.47241873 |
| NT-adult | 20   | 35.20237386 |
| NT-adult | 21   | 23.26303528 |
| NT-adult | 22   | 30.60271771 |
| NT-adult | 23   | 3.833688798 |
| NT-adult | 23   | 6.113175362 |
| NT-adult | 23   | 8.396139041 |
| NT-adult | 23   | 24.05636355 |
| NT-adult | 23   | 25.58359872 |
| NT-adult | 23   | 25.69227237 |
| NT-adult | 24   | 22.92748238 |
| NT-adult | 24   | 35.18252164 |

| Table 9 Detection rate in NT and ASD cohort |                      |                       |             |             |              |            |
|---------------------------------------------|----------------------|-----------------------|-------------|-------------|--------------|------------|
| taxa                                        | Detection rate in NT | Detection rate in ASD | pvalue      | qvalue      | Difference   | Type       |
| d_Bacteria.p_Firmic                         | 0.997772829          | 1                     | 0.367430442 | 0.393410372 | 0.002227171  | Increasing |
| d_Bacteria.p_Prote                          | 0.997772829          | 0.998706339           | 1           | 1           | 0.00093351   | Increasing |
| d_Bacteria.p_Bacte                          | 0.997772829          | 0.997412678           | 1           | 1           | -0.000360151 | Decreasing |
| d_Bacteria.p_Firmic                         | 0.997772829          | 0.996119017           | 1           | 1           | -0.001653812 | Decreasing |
| d_Bacteria.p_Firmic                         | 0.997772829          | 0.984476067           | 0.038972124 | 0.045900502 | -0.013296761 | Decreasing |
| d_Bacteria.p_Actin                          | 0.995545657          | 0.985769728           | 0.149452142 | 0.166757127 | -0.009775929 | Decreasing |
| d_Bacteria.p_Firmic                         | 0.997772829          | 0.981888745           | 0.013942934 | 0.016987942 | -0.015884083 | Decreasing |
| d_Bacteria.p_Firmic                         | 0.995545657          | 0.980595084           | 0.040093391 | 0.046702191 | -0.014950573 | Decreasing |
| d_Bacteria.p_Firmic                         | 0.986636971          | 0.96377749            | 0.018832868 | 0.022685046 | -0.022859481 | Decreasing |
| d_Bacteria.p_Actin                          | 0.975501114          | 0.966364812           | 0.488817317 | 0.513016194 | -0.009136301 | Decreasing |
| d_Bacteria.p_Firmic                         | 0.975501114          | 0.943078913           | 0.009395497 | 0.011716737 | -0.0324222   | Decreasing |
| d_Bacteria.p_Firmic                         | 0.964365256          | 0.943078913           | 0.10130244  | 0.115462996 | -0.021286343 | Decreasing |
| d_Bacteria.p_Firmic                         | 0.971046771          | 0.927554981           | 0.001205833 | 0.001579006 | -0.04349179  | Decreasing |
| d_Bacteria.p_Bacte                          | 0.959910913          | 0.928848642           | 0.032666675 | 0.038906377 | -0.031062271 | Decreasing |
| d_Bacteria.p_Firmic                         | 0.935412027          | 0.940491591           | 0.712592404 | 0.733347522 | 0.005079564  | Decreasing |
| d_Bacteria.p_Firmic                         | 0.966819599          | 0.915912031           | 0.000245859 | 0.000338455 | -0.052907568 | Decreasing |
| d_Bacteria.p_Firmic                         | 0.9844098            | 0.905562743           | 5.92E-09    | 1.06E-08    | -0.078847057 | Decreasing |
| d_Bacteria.p_Firmic                         | 0.966819599          | 0.908150065           | 3.47E-05    | 5.04E-05    | -0.060669534 | Decreasing |
| d_Bacteria.p_Firmic                         | 0.953229399          | 0.913324709           | 0.011159374 | 0.013754577 | -0.03990469  | Decreasing |
| d_Bacteria.p_Firmic                         | 0.942093541          | 0.919793014           | 0.168495819 | 0.186047467 | -0.022300527 | Decreasing |
| d_Bacteria.p_Firmic                         | 0.93986637           | 0.919793014           | 0.210302441 | 0.229815039 | -0.020073355 | Decreasing |
| d_Bacteria.p_Prote                          | 0.95545657           | 0.909443726           | 0.002971231 | 0.003794584 | -0.046012844 | Decreasing |
| d_Bacteria.p_Firmic                         | 0.95545657           | 0.891332471           | 7.20E-05    | 0.000101813 | -0.064124099 | Decreasing |
| d_Bacteria.p_Firmic                         | 0.966819599          | 0.880983182           | 2.42E-08    | 4.14E-08    | -0.087836417 | Decreasing |
| d_Bacteria.p_Firmic                         | 0.926503341          | 0.899094437           | 0.121507975 | 0.137019631 | -0.027408903 | Decreasing |
| d_Bacteria.p_Bacte                          | 0.966592428          | 0.870633894           | 5.90E-09    | 1.06E-08    | -0.095958534 | Decreasing |
| d_Bacteria.p_Firmic                         | 0.953229399          | 0.877102199           | 6.61E-06    | 9.73E-06    | -0.076127199 | Decreasing |
| d_Bacteria.p_Firmic                         | 0.957683742          | 0.861578266           | 2.69E-08    | 4.53E-08    | -0.096105475 | Decreasing |
| d_Bacteria.p_Firmic                         | 0.93986637           | 0.839586028           | 1.18E-07    | 1.85E-07    | -0.100280341 | Decreasing |
| d_Bacteria.p_Firmic                         | 0.879732739          | 0.861578266           | 0.381648535 | 0.404547447 | -0.018154473 | Decreasing |
| d_Bacteria.p_Firmic                         | 0.942093541          | 0.81759379            | 1.53E-10    | 2.95E-10    | -0.124499751 | Decreasing |
| d_Bacteria.p_Firmic                         | 0.93986637           | 0.816300129           | 3.24E-10    | 6.14E-10    | -0.12356624  | Decreasing |
| d_Bacteria.p_Firmic                         | 0.926503341          | 0.813712807           | 2.95E-08    | 4.89E-08    | -0.112790534 | Decreasing |
| d_Bacteria.p_Prote                          | 0.902004454          | 0.81759379            | 6.48E-05    | 9.29E-05    | -0.084410664 | Decreasing |
| d_Bacteria.p_Firmic                         | 0.915367483          | 0.800776197           | 5.49E-08    | 8.82E-08    | -0.114591287 | Decreasing |
| d_Bacteria.p_Firmic                         | 0.846325167          | 0.831824062           | 0.521518481 | 0.541970186 | -0.014501105 | Decreasing |
| d_Bacteria.p_Firmic                         | 0.937639198          | 0.777490298           | 1.53E-14    | 3.97E-14    | -0.160148901 | Decreasing |
| d_Bacteria.p_Firmic                         | 0.899777283          | 0.794307891           | 1.07E-06    | 1.60E-06    | -0.105469392 | Decreasing |
| d_Bacteria.p_Firmic                         | 0.93986637           | 0.767141009           | 1.87E-16    | 6.19E-16    | -0.172725361 | Decreasing |
| d_Bacteria.p_Bacte                          | 0.935412027          | 0.752910737           | 3.12E-17    | 1.14E-16    | -0.182501289 | Decreasing |
| d_Bacteria.p_Firmic                         | 0.888641425          | 0.778783959           | 1.03E-06    | 1.55E-06    | -0.109857467 | Decreasing |
| d_Bacteria.p_Firmic                         | 0.917594655          | 0.74385511            | 1.09E-14    | 2.89E-14    | -0.173739545 | Decreasing |
| d_Bacteria.p_Firmic                         | 0.890868597          | 0.724450194           | 1.48E-12    | 3.21E-12    | -0.166418403 | Decreasing |
| d_Bacteria.p_Firmic                         | 0.897550111          | 0.698576973           | 9.22E-17    | 3.15E-16    | -0.198973139 | Decreasing |
| d_Bacteria.p_Firmic                         | 0.890868597          | 0.701164295           | 3.63E-15    | 1.04E-14    | -0.189704302 | Decreasing |
| d_Bacteria.p_Fusot                          | 0.848552339          | 0.690815006           | 3.82E-10    | 7.10E-10    | -0.157773732 | Decreasing |
| d_Bacteria.p_Firmic                         | 0.917594655          | 0.650711514           | 4.61E-28    | 5.42E-27    | -0.266883141 | Decreasing |
| d_Bacteria.p_Firmic                         | 0.881959911          | 0.668822768           | 1.02E-17    | 3.99E-17    | -0.213137142 | Decreasing |
| d_Bacteria.p_Firmic                         | 0.853006682          | 0.675291074           | 3.32E-12    | 6.76E-12    | -0.177715608 | Decreasing |
| d_Bacteria.p_Firmic                         | 0.795100223          | 0.706338939           | 0.000715978 | 0.000948667 | -0.088761284 | Decreasing |
| d_Bacteria.p_Firmic                         | 0.861915367          | 0.663648124           | 5.47E-15    | 1.53E-14    | -0.198267243 | Decreasing |
| d_Bacteria.p_Firmic                         | 0.86636971           | 0.64683053            | 1.07E-17    | 4.07E-17    | -0.21953918  | Decreasing |
| d_Bacteria.p_Desul                          | 0.848552339          | 0.64683053            | 9.39E-15    | 2.55E-14    | -0.201721808 | Decreasing |
| d_Bacteria.p_Firmic                         | 0.832962138          | 0.630012937           | 1.73E-14    | 4.38E-14    | -0.202949201 | Decreasing |
| d_Bacteria.p_Firmic                         | 0.841870824          | 0.608020699           | 1.59E-18    | 7.34E-18    | -0.233850125 | Decreasing |
| d_Bacteria.p_Firmic                         | 0.752783964          | 0.655868158           | 0.000406791 | 0.000552819 | -0.096897807 | Decreasing |
| d_Bacteria.p_Firmic                         | 0.861915367          | 0.591203105           | 1.57E-24    | 1.11E-23    | -0.270712263 | Decreasing |
| d_Bacteria.p_Firmic                         | 0.812917595          | 0.619663648           | 7.43E-13    | 1.64E-12    | -0.193253947 | Decreasing |
| d_Bacteria.p_Firmic                         | 0.772828508          | 0.627425614           | 1.17E-07    | 1.85E-07    | -0.145402893 | Decreasing |
| d_Bacteria.p_Actin                          | 0.795100223          | 0.593790427           | 3.05E-13    | 7.36E-13    | -0.201309796 | Decreasing |
| d_Bacteria.p_Prote                          | 0.844097996          | 0.564036223           | 5.08E-25    | 3.85E-24    | -0.280061773 | Decreasing |
| d_Bacteria.p_Firmic                         | 0.839643653          | 0.553686934           | 1.25E-25    | 1.02E-24    | -0.285956719 | Decreasing |
| d_Bacteria.p_Firmic                         | 0.815144766          | 0.562742561           | 6.02E-20    | 3.04E-19    | -0.252402205 | Decreasing |
| d_Bacteria.p_Verru                          | 0.779510022          | 0.576972833           | 3.80E-13    | 8.57E-13    | -0.202537189 | Decreasing |
| d_Bacteria.p_Firmic                         | 0.857461024          | 0.522639069           | 1.78E-34    | 3.78E-33    | -0.334821956 | Decreasing |
| d_Bacteria.p_Firmic                         | 0.797327394          | 0.53686934            | 1.34E-20    | 7.49E-20    | -0.260458054 | Decreasing |
| d_Bacteria.p_Firmic                         | 0.812917595          | 0.517464424           | 5.24E-26    | 5.55E-25    | -0.29545317  | Decreasing |
| d_Bacteria.p_Firmic                         | 0.788418708          | 0.473479948           | 4.38E-28    | 5.42E-27    | -0.31493876  | Decreasing |
| d_Bacteria.p_Firmic                         | 0.706013363          | 0.504527814           | 4.17E-12    | 8.35E-12    | -0.201485549 | Decreasing |
| d_Bacteria.p_Bacte                          | 0.766146993          | 0.433376455           | 1.66E-30    | 2.94E-29    | -0.332770538 | Decreasing |
| d_Bacteria.p_Firmic                         | 0.710467706          | 0.459249677           | 9.25E-18    | 3.77E-17    | -0.251218029 | Decreasing |
| d_Bacteria.p_Firmic                         | 0.694877506          | 0.437257439           | 2.33E-18    | 1.03E-17    | -0.257620067 | Decreasing |
| d_Bacteria.p_Firmic                         | 0.65701559           | 0.455368693           | 1.02E-11    | 2.00E-11    | -0.201646897 | Decreasing |
| d_Bacteria.p_Firmic                         | 0.563474388          | 0.460543338           | 0.00057499  | 0.000771506 | -0.10293105  | Decreasing |
| d_Bacteria.p_Firmic                         | 0.708240535          | 0.375161708           | 9.10E-30    | 1.38E-28    | -0.333078827 | Decreasing |
| d_Bacteria.p_Firmic                         | 0.632516704          | 0.385510996           | 6.56E-17    | 2.32E-16    | -0.247005708 | Decreasing |
| d_Bacteria.p_Firmic                         | 0.599109131          | 0.39068564            | 1.95E-12    | 4.13E-12    | -0.208423491 | Decreasing |
| d_Bacteria.p_Firmic                         | 0.605790646          | 0.363518758           | 2.33E-16    | 7.48E-16    | -0.242271888 | Decreasing |
| d_Bacteria.p_Bacte                          | 0.576837416          | 0.342820181           | 1.86E-15    | 5.48E-15    | -0.234017235 | Decreasing |
| d_Bacteria.p_Bacte                          | 0.603563474          | 0.323415265           | 2.08E-21    | 1.30E-20    | -0.280148209 | Decreasing |
| d_Bacteria.p_Bacte                          | 0.659242762          | 0.253557568           | 2.95E-44    | 3.13E-42    | -0.405685194 | Decreasing |
| d_Bacteria.p_Desul                          | 0.527839644          | 0.315653299           | 3.79E-13    | 8.57E-13    | -0.212186345 | Decreasing |
| d_Bacteria.p_Firmic                         | 0.621380846          | 0.227684347           | 1.50E-42    | 7.95E-41    | -0.3936965   | Decreasing |
| d_Bacteria.p_Firmic                         | 0.523385301          | 0.26778784            | 5.59E-19    | 2.69E-18    | -0.255597461 | Decreasing |
| d_Bacteria.p_Bacte                          | 0.592427617          | 0.226390686           | 2.07E-37    | 7.33E-36    | -0.366036931 | Decreasing |
| d_Bacteria.p_Firmic                         | 0.46325167           | 0.263906856           | 2.42E-12    | 5.02E-12    | -0.199344814 | Decreasing |
| d_Bacteria.p_Firmic                         | 0.556792873          | 0.204398448           | 6.92E-36    | 1.83E-34    | -0.352394425 | Decreasing |
| d_Bacteria.p_Firmic                         | 0.5077951            | 0.228978008           | 4.81E-23    | 3.18E-22    | -0.278817092 | Decreasing |
| d_Bacteria.p_Firmic                         | 0.481069042          | 0.221216041           | 1.51E-20    | 8.02E-20    | -0.259853001 | Decreasing |
| d_Bacteria.p_Firmic                         | 0.467706013          | 0.226390686           | 5.45E-18    | 2.31E-17    | -0.241315328 | Decreasing |
| d_Bacteria.p_Firmic                         | 0.483296214          | 0.192755498           | 5.76E-26    | 5.56E-25    | -0.290540716 | Decreasing |
| d_Bacteria.p_Syner                          | 0.354120267          | 0.250970246           | 0.000145438 | 0.000202847 | -0.103150021 | Decreasing |
| d_Bacteria.p_Bacte                          | 0.454342984          | 0.172056921           | 1.04E-25    | 9.21E-25    | -0.282286063 | Decreasing |
| d_Bacteria.p_Firmic                         | 0.432071269          | 0.179818887           | 5.49E-21    | 3.23E-20    | -0.252252382 | Decreasing |
| d_Bacteria.p_Firmic                         | 0.389755011          | 0.179818887           | 1.67E-15    | 5.07E-15    | -0.209936124 | Decreasing |
| d_Bacteria.p_Firmic                         | 0.378619154          | 0.179818887           | 3.38E-14    | 8.32E-14    | -0.198800266 | Decreasing |
| d_Bacteria.p_Prote                          | 0.369710468          | 0.160413972           | 4.37E-16    | 1.36E-15    | -0.209296496 | Decreasing |
| d_Bacteria.p_Firmic                         | 0.265033408          | 0.135834411           | 4.02E-08    | 6.55E-08    | -0.129198996 | Decreasing |
| d_Bacteria.p_Verru                          | 0.229398664          | 0.078913325           | 3.34E-13    | 7.87E-13    | -0.150485339 | Decreasing |
| d_Bacteria.p_Firmic                         | 0.131403118          | 0.094437257           | 0.055536841 | 0.063988099 | -0.036965861 | Decreasing |
| d_Bacteria.p_Actin                          | 0.08908686           | 0.068564036           | 0.218265806 | 0.236083422 | -0.020522823 | Decreasing |
| d_Bacteria.p_Bacte                          | 0.042316258          | 0.091849935           | 0.00135048  | 0.001745742 | 0.049533677  | Decreasing |
| d_Bacteria.p_Cyan                           | 0.113585746          | 0.029754204           | 7.75E-09    | 1.37E-08    | -0.083831542 | Decreasing |
| d_Bacteria.p_Bacte                          | 0.111358575          | 0.029754204           | 2.41E-08    | 4.14E-08    | -0.08160437  | Decreasing |
| d_Bacteria.p_Firmic                         | 0.026726058          | 0.06080207            | 0.008040858 | 0.010146797 | 0.034076012  | Decreasing |
| d_Bacteria.p_Desul                          | 0.08908686           | 0.021992238           | 1.75E-07    | 2.68E-07    | -0.067094622 | Decreasing |

ASD2.0

NT2.3

Table 10 Detection rate by age

NT5.5

ASD2.5

NT5.6

ASD2.6

NT6

ASD2.6

**Table 11 The detection rate of children under and after 3years**

| taxa                                              | NT0         | ASD0        | NT1         | ASD1        | NT0_ASD0_difference | NT1_ASD1_difference |
|---------------------------------------------------|-------------|-------------|-------------|-------------|---------------------|---------------------|
| d_Bacteriap_Firmicutes_c_Clostridia_o_Clostridia  | 1           | 0.93994334  | 0.06959707  | 0.035602735 | -0.036453599        | 0.016047692         |
| d_Bacteri                                         | 0.979166667 | 0.942731278 | 0.923512748 | 0.93956044  | -0.036453599        | 0.016047692         |
| d_Bacteri                                         | 1           | 1           | 0.997167139 | 1           | 0                   | 0.002832861         |
| d_Bacteri                                         | 1           | 1           | 0.997167139 | 0.998168498 | 0                   | 0.001001359         |
| d_Bacteri                                         | 1           | 0.995594714 | 0.997167139 | 0.998168498 | -0.004405286        | 0.001001359         |
| d_Bacteri                                         | 1           | 0.995594714 | 0.997167139 | 0.996336996 | -0.004405286        | -0.000830142        |
| d_Bacteriap_Actinobacteriota_c_Corinobacteriia_o  | 1           | 0.076487252 | 0.075091575 | 0.075091575 | -0.001395677        | -0.001395677        |
| d_Bacteri                                         | 0.854166667 | 0.810572687 | 0.88685552  | 0.882783883 | -0.043593979        | -0.00390167         |
| d_Bacteri                                         | 1           | 0.969162996 | 0.997167139 | 0.990842491 | -0.030837004        | -0.006324648        |
| d_Bacteri                                         | 0.96875     | 0.955947137 | 0.97733711  | 0.970695971 | -0.012802863        | -0.00664114         |
| d_Bacteri                                         | 1           | 0.982378855 | 0.994334278 | 0.987179487 | -0.017621145        | -0.00715479         |
| d_Bacteriap_Firmicutes_c_Clostridia_o_Oscillosp   | 1           | 0.042492918 | 0.034798535 | 0.034798535 | -0.007694383        | -0.007694383        |
| d_Bacteri                                         | 0.989583333 | 0.964757709 | 0.997167139 | 0.987179487 | -0.024825624        | -0.009987652        |
| d_Bacteri                                         | 1           | 0.969162996 | 0.997167139 | 0.987179487 | -0.030837004        | -0.009987652        |
| d_Bacteri                                         | 0.895833333 | 0.872246696 | 0.954674221 | 0.93956044  | -0.023586637        | -0.015113781        |
| d_Bacteri                                         | 0.958333333 | 0.933920705 | 0.994334278 | 0.976190476 | -0.024412628        | -0.018143801        |
| d_Bacteri                                         | 0.958333333 | 0.933920705 | 0.966056666 | 0.946866447 | -0.024412628        | -0.019119219        |
| d_Bacteri                                         | 0.947916667 | 0.916299559 | 0.818696884 | 0.796703297 | -0.031617107        | -0.021993587        |
| d_Bacteri                                         | 0.9375      | 0.894273128 | 0.923512748 | 0.901098901 | -0.043226872        | -0.022413847        |
| d_Bacteri                                         | 0.958333333 | 0.947136564 | 0.934841193 | 0.908424908 | -0.011196769        | -0.026419294        |
| d_Bacteri                                         | 0.979166667 | 0.933920705 | 0.974504249 | 0.946866447 | -0.045245962        | -0.027617802        |
| d_Bacteri                                         | 0.96875     | 0.938325591 | 0.957507082 | 0.924908425 | -0.030424009        | -0.032598657        |
| d_Bacteri                                         | 0.958333333 | 0.894273128 | 0.954674221 | 0.915750916 | -0.064602006        | -0.038923305        |
| d_Bacteri                                         | 1           | 0.942731278 | 0.947098901 | 0.947098901 | -0.057268722        | -0.039411014        |
| d_Bacteriap_Firmicutes_c_Clostridia_o_Lachnosp    | 1           | 0.150141643 | 0.10989011  | 0.10989011  | -0.040251533        | -0.040251533        |
| d_Bacteri                                         | 0.9375      | 0.907488987 | 0.980169972 | 0.935897436 | -0.030011013        | -0.044272536        |
| d_Bacteri                                         | 0.927083333 | 0.86784141  | 0.980169972 | 0.935897436 | -0.059241924        | -0.044272536        |
| d_Bacteri                                         | 0.927083333 | 0.841409692 | 0.963172805 | 0.912087912 | -0.085673642        | -0.051084892        |
| d_Bacteri                                         | 0.875       | 0.829559178 | 0.940465934 | 0.950018355 | -0.054602585        | -0.054602585        |
| d_Bacteri                                         | 0.802083333 | 0.704845815 | 0.92917847  | 0.864468864 | -0.097237518        | -0.064709606        |
| d_Bacteri                                         | 0.96875     | 0.863436123 | 0.988668555 | 0.923076923 | -0.105313877        | -0.065591632        |
| d_Bacteriap_Desulfobacteriota_c_Desulfovibrion    | 1           | 0.099150142 | 0.07472527  | 0.07472527  | -0.024477614        | -0.024477614        |
| d_Bacteriap_Firmicutes_c_Bacillioa_Erysipelotrich | 1           | 0.770538244 | 0.695970696 | 0.695970696 | -0.074567548        | -0.074567548        |
| d_Bacteriap_Bacteroidota_c_Bacteroidia_o_Bacte    | 1           | 0.113314448 | 0.034798535 | 0.034798535 | -0.078515048        | -0.078515048        |
| d_Bacteri                                         | 0.927083333 | 0.779735683 | 0.943342776 | 0.864468864 | -0.147347651        | -0.078873912        |
| d_Bacteri                                         | 0.875       | 0.837004405 | 0.974504249 | 0.893772894 | -0.037995955        | -0.080731356        |
| d_Bacteri                                         | 0.947916667 | 0.850220264 | 0.974504249 | 0.893772894 | -0.097696402        | -0.080731356        |
| d_Bacteriap_Firmicutes_c_Bacillioa_Lactobacillae  | 1           | 0.801699717 | 0.71978022  | 0.71978022  | -0.081913497        | -0.081913497        |
| d_Bacteri                                         | 0.90625     | 0.797386628 | 0.971671388 | 0.882178388 | -0.108893172        | -0.081913497        |
| d_Bacteri                                         | 0.885416667 | 0.788546256 | 0.988668555 | 0.904761905 | -0.096870411        | -0.08390665         |
| d_Bacteriap_Synergistota_c_Synergistia_o_Syner    | 1           | 0.376770538 | 0.282051282 | 0.282051282 | -0.094719256        | -0.094719256        |
| d_Bacteri                                         | 0.802083333 | 0.682819383 | 0.946175637 | 0.84981685  | -0.11926395         | -0.096358788        |
| d_Bacteriap_Cyanobacteriia_c_Vampirivibrionia_o   | 1           | 0.0311615   | 0.031135531 | 0.031135531 | -0.000025969        | -0.000025969        |
| d_Bacteri                                         | 0.875       | 0.766519824 | 0.906515581 | 0.805860806 | -0.108480176        | -0.10854775         |
| d_Bacteri                                         | 0.833333333 | 0.713658388 | 0.968838527 | 0.858974359 | -0.119676946        | -0.109864168        |
| d_Bacteri                                         | 0.864583333 | 0.775330396 | 0.943342776 | 0.82967033  | -0.089252937        | -0.113672447        |
| d_Bacteri                                         | 0.541666667 | 0.475770925 | 0.589405099 | 0.454212454 | -0.065895742        | -0.115192645        |
| d_Bacteri                                         | 0.916666667 | 0.773568683 | 0.833333333 | 0.733930894 | -0.115675166        | -0.115675166        |
| d_Bacteri                                         | 0.90625     | 0.806167401 | 0.883852691 | 0.767399267 | -0.100082599        | -0.116453424        |
| d_Bacteriap_Firmicutes_c_Necativicutes_o_Veill    | 1           | 0.280453258 | 0.148351648 | 0.148351648 | -0.132101609        | -0.132101609        |
| d_Bacteri                                         | 0.697916667 | 0.59030837  | 0.793201133 | 0.642857143 | -0.107608297        | -0.15034399         |
| d_Bacteri                                         | 0.864583333 | 0.709251101 | 0.957507082 | 0.805860806 | -0.155332322        | -0.151646276        |
| d_Bacteri                                         | 0.822916667 | 0.62955947  | 0.943342776 | 0.791208791 | -0.19296072         | -0.152132885        |
| d_Bacteri                                         | 0.90625     | 0.718061674 | 0.949008499 | 0.78545788  | -0.188188326        | -0.161462711        |
| d_Bacteri                                         | 0.833333333 | 0.691629956 | 0.852691218 | 0.69047619  | -0.141703377        | -0.162215028        |
| d_Bacteri                                         | 0.75        | 0.625550661 | 0.92917847  | 0.765567766 | -0.124449339        | -0.163610705        |
| d_Bacteri                                         | 0.802083333 | 0.621145374 | 0.971671388 | 0.807692308 | -0.18097959         | -0.16397908         |
| d_Bacteriap_Verrucomicrobiota_c_Lentisphaeria     | 1           | 0.263456091 | 0.098901099 | 0.098901099 | -0.164545492        | -0.164545492        |
| d_Bacteri                                         | 0.666666667 | 0.422907489 | 0.830028329 | 0.664835165 | -0.243759178        | -0.165193164        |
| d_Bacteri                                         | 0.729166667 | 0.577092511 | 0.88685552  | 0.716117216 | -0.152074156        | -0.170568336        |
| d_Bacteri                                         | 0.697916667 | 0.497797357 | 0.889518414 | 0.708791209 | -0.20011931         | -0.180727205        |
| d_Bacteriap_Firmicutes_c_Clostridia_o_Lachnosp    | 1           | 0.694050992 | 0.509157509 | 0.509157509 | -0.184883482        | -0.184883482        |
| d_Bacteriap_Firmicutes_c_Clostridia_o_Peptostre   | 1           | 0.21022711  | 0.21022711  | 0.21022711  | -0.18881017         | -0.18881017         |
| d_Bacteri                                         | 0.854166667 | 0.63876652  | 0.864022663 | 0.673992674 | -0.215400147        | -0.190029989        |
| d_Bacteri                                         | 0.697916667 | 0.537444934 | 0.841912635 | 0.653846154 | -0.160471733        | -0.190346481        |
| d_Bacteri                                         | 0.791666667 | 0.555066079 | 0.906515581 | 0.716117216 | -0.236600587        | -0.190398365        |
| d_Bacteri                                         | 0.485833333 | 0.281953526 | 0.62395184  | 0.435897436 | -0.207645007        | -0.192997748        |
| d_Bacteri                                         | 0.729166667 | 0.603524229 | 0.934841193 | 0.74758242  | -0.2125642438       | -0.193085951        |
| d_Bacteriap_Firmicutes_c_Clostridia_o_Peptostre   | 1           | 0.767705382 | 0.567765568 | 0.567765568 | -0.199939815        | -0.199939815        |
| d_Bacteri                                         | 0.75        | 0.555066079 | 0.78735411  | 0.586080586 | -0.194933921        | -0.201454825        |
| d_Bacteri                                         | 0.75        | 0.533039648 | 0.898016997 | 0.694139194 | -0.216960352        | -0.203877803        |
| d_Bacteri                                         | 0.791666667 | 0.645171806 | 0.925345609 | 0.721611722 | -0.14849496         | -0.204733887        |
| d_Bacteri                                         | 0.604166667 | 0.502202643 | 0.895184136 | 0.683150183 | -0.101964023        | -0.212033953        |
| d_Bacteri                                         | 0.302083333 | 0.127753304 | 0.388101983 | 0.173992674 | -0.174330029        | -0.214109309        |
| d_Bacteriap_Firmicutes_c_Clostridia_o_Lachnosp    | 1           | 0.529745042 | 0.311355311 | 0.311355311 | -0.218389731        | -0.218389731        |
| d_Bacteriap_Desulfobacteriota_c_Desulfovibrion    | 1           | 0.36096516  | 0.34069341  | 0.34069341  | -0.020247175        | -0.020247175        |
| d_Bacteriap_Firmicutes_c_Clostridia_o_Lachnosp    | 1           | 0.606322295 | 0.384615385 | 0.384615385 | -0.22131681         | -0.22131681         |
| d_Bacteri                                         | 0.65625     | 0.462555066 | 0.892351275 | 0.668498168 | -0.193694934        | -0.223853106        |
| d_Bacteriap_Firmicutes_c_Clostridia_o_Peptostre   | 1           | 0.526912181 | 0.296703297 | 0.296703297 | -0.230208885        | -0.230208885        |
| d_Bacteri                                         | 0.177083333 | 0.13215859  | 0.433427762 | 0.199637    | -0.044924743        | -0.233794062        |
| d_Bacteri                                         | 0.739583333 | 0.427312775 | 0.895184136 | 0.659340659 | -0.312270558        | -0.235843477        |
| d_Bacteriap_Firmicutes_c_Clostridia_o_Oscillosp   | 1           | 0.436280623 | 0.197802198 | 0.197802198 | -0.238458425        | -0.238458425        |
| d_Bacteri                                         | 0.645833333 | 0.396475771 | 0.838526912 | 0.595238095 | -0.249357562        | -0.243288817        |
| d_Bacteri                                         | 0.635416667 | 0.427312775 | 0.864022663 | 0.619047619 | -0.208103891        | -0.244975044        |
| d_Bacteri                                         | 0.447916667 | 0.259911894 | 0.682719547 | 0.437728938 | -0.188004772        | -0.244990609        |
| d_Bacteriap_Firmicutes_c_Bacillioa_RF391_RF39     | 1           | 0.497252125 | 0.23895238  | 0.23895238  | -0.249156887        | -0.249156887        |
| d_Bacteri                                         | 0.46875     | 0.325981189 | 0.606322295 | 0.34981685  | -0.142758811        | -0.258415445        |
| d_Bacteri                                         | 0.458333333 | 0.308370044 | 0.779036827 | 0.521978022 | -0.149963289        | -0.257058805        |
| d_Bacteriap_Firmicutes_c_Clostridia_o_Peptostre   | 1           | 0.495750708 | 0.232600733 | 0.232600733 | -0.263149976        | -0.263149976        |
| d_Bacteri                                         | 0.354166667 | 0.154185022 | 0.51580737  | 0.249084249 | -0.199981645        | -0.266496487        |
| d_Bacteriap_Firmicutes_c_Clostridia_o_Oscillosp   | 1           | 0.470254958 | 0.203296703 | 0.203296703 | -0.266958254        | -0.266958254        |
| d_Bacteri                                         | 0.510416667 | 0.339207048 | 0.745042493 | 0.478021978 | -0.171209618        | -0.267020515        |
| d_Bacteri                                         | 0.770833333 | 0.502202643 | 0.864022663 | 0.58974359  | -0.26863069         | -0.274279073        |
| d_Bacteri                                         | 0.447916667 | 0.215859031 | 0.645892351 | 0.368131868 | -0.232057636        | -0.277760483        |
| d_Bacteri                                         | 0.84375     | 0.643171806 | 0.937677054 | 0.653846154 | -0.200578194        | -0.2838309          |
| d_Bacteriap_Bacteroidota_c_Bacteroidia_o_Bacte    | 1           | 0.497252125 | 0.203296703 | 0.203296703 | -0.266958254        | -0.266958254        |
| d_Bacteri                                         | 0.666666667 | 0.440528634 | 0.88685552  | 0.600732601 | -0.226138032        | -0.285952952        |
| d_Bacteri                                         | 0.666666667 | 0.422907489 | 0.852691218 | 0.556776557 | -0.243759178        | -0.295914661        |
| d_Bacteri                                         | 0.770833333 | 0.418502203 | 0.793201133 | 0.496336996 | -0.352331311        | -0.298664137        |
| d_Bacteri                                         | 0.34375     | 0.18061674  | 0.552407932 | 0.249084249 | -0.16313326         | -0.303323683        |
| d_Bacteriap_Firmicutes_c_Clostridia_o_Lachnosp    | 1           | 0.51580737  | 0.209695707 | 0.209695707 | -0.30862103         | -0.30862103         |
| d_Bacteri                                         | 0.541666667 | 0.25506608  | 0.827195467 | 0.507326007 | -0.286160059        | -0.31986946         |
| d_Bacteri                                         | 0.583333333 | 0.264317181 | 0.742209632 | 0.421245421 | -0.319016153        | -0.32096421         |
| d_Bacteri                                         | 0.822916667 | 0.528634361 | 0.866855524 | 0.52014652  | -0.294282305        | -0.346709004        |
| d_Bacteri                                         | 0.5         | 0.185022026 | 0.57223796  | 0.212454212 | -0.314977974        | -0.359783748        |
| d_Bacteri                                         | 0.489583333 | 0.18061674  | 0.620386601 | 0.245421245 | -0.308966593        | -0.374975355        |
| d_Bacteri                                         | 0.541666667 | 0.215859031 | 0.64306949  | 0.232600733 | -0.325807636        | -0.410458757        |
| d_Bacteriap_Bacteroidota_c_Bacteroidia_o_Bacte    | 1           | 0.696883853 | 0.28021978  | 0.28021978  | -0.416664072        | -0.416664072        |

NT0: taxa detection rate in NT cohort under 3(included) years old  
ASD0: taxa detection rate in ASD cohort under 3(included) years old  
NT1: taxa detection rate in NT cohort after 3 years old  
ASD1: taxa detection rate in ASD cohort after 3 years old  
NT0\_ASD0\_difference: ASD0-NT0  
NT1\_ASD1\_difference: ASD1-NT1

| Table 12 Enlarging microbial relationship alternation with increasing ASD score |         |         |              |             |             |             |             |             |               |                       |  |
|---------------------------------------------------------------------------------|---------|---------|--------------|-------------|-------------|-------------|-------------|-------------|---------------|-----------------------|--|
| index                                                                           | Taxon1  | Taxon2  | Group 1      | Group 2     | Group 3     | Group 4     | R-square    | coefficient | Taxon1 detect | Taxon2 detection rate |  |
| 1_d                                                                             | Bacteri | Bacteri | 0            | 0.030402191 | 0.177473584 | 0.414827419 | 0.98194699  | 0.192212614 | 0.449593496   | 0.258536585           |  |
| 2_d                                                                             | Bacteri | Bacteri | 0.023748621  | 0           | 0.110463288 | 0.39550352  | 0.913334129 | 0.185900866 | 0.639837398   | 0.258536585           |  |
| 3_d                                                                             | Bacteri | Bacteri | 0.023635102  | 0           | 0.108514535 | 0.38325046  | 0.914739418 | 0.179707679 | 0.473170732   | 0.309756098           |  |
| 4_d                                                                             | Bacteri | Bacteri | 0            | 0.052013578 | 0.34737405  | 0.40868343  | 0.874802924 | 0.178472382 | 0.334146341   | 0.25033552            |  |
| 5_d                                                                             | Bacteri | Bacteri | 0.099926855  | 0           | 0.101828421 | 0.456326731 | 0.754001498 | 0.178199938 | 0.494308943   | 0.258536585           |  |
| 6_d                                                                             | Bacteri | Bacteri | 0.086644323  | 0.121380717 | 0           | 0.431995102 | 0.824598097 | 0.17267539  | 0.565853659   | 0.318699187           |  |
| 7_d                                                                             | Bacteri | Bacteri | 0            | 0.01102791  | 0.014173968 | 0.338525328 | 0.751431186 | 0.158145059 | 0.369918699   | 0.28699187            |  |
| 8_d                                                                             | Bacteri | Bacteri | 0.012065936  | 0.18235507  | 0           | 0.327553328 | 0.997896068 | 0.157743896 | 0.369918699   | 0.258536585           |  |
| 9_d                                                                             | Bacteri | Bacteri | 0.02006529   | 0.02715604  | 0.327051117 | 0           | 0.767314024 | 0.153492914 | 0.42601626    | 0.31300813            |  |
| 10_d                                                                            | Bacteri | Bacteri | 0            | 0.069734028 | 0.113497108 | 0.364164351 | 0.866499156 | 0.149252162 | 0.531707317   | 0.257723577           |  |
| 11_d                                                                            | Bacteri | Bacteri | 0            | 0.001069837 | 0.06821461  | 0.282069571 | 0.916705326 | 0.140499867 | 0.742276423   | 0.309756098           |  |
| 12_d                                                                            | Bacteri | Bacteri | 0.057002013  | 0.06881672  | 0.329716111 | 0           | 0.782428395 | 0.136357049 | 0.403250303   | 0.369918699           |  |
| 13_d                                                                            | Bacteri | Bacteri | 0            | 0.060738219 | 0.178146912 | 0.329131261 | 0.91947012  | 0.134196521 | 0.363414634   | 0.2928927             |  |
| 14_d                                                                            | Bacteri | Bacteri | 0.00084512   | 0           | 0.056072492 | 0.25995212  | 0.901132794 | 0.1295535   | 0.449593496   | 0.423577236           |  |
| 15_d                                                                            | Bacteri | Bacteri | 0.012213275  | 0.117099432 | 0           | 0.270772682 | 0.988271454 | 0.129279704 | 0.663414634   | 0.25203252            |  |
| 16_d                                                                            | Bacteri | Bacteri | 0.051784664  | 0.168763272 | 0.306393477 | 0           | 0.997811796 | 0.127300406 | 0.574796748   | 0.468292683           |  |
| 17_d                                                                            | Bacteri | Bacteri | 0            | 0.008278091 | 0.150762693 | 0.256752623 | 0.992860592 | 0.124237266 | 0.28699187    | 0.271544715           |  |
| 18_d                                                                            | Bacteri | Bacteri | 0.115123806  | 0.119556459 | 0.407929303 | 0.432233013 | 0.835636456 | 0.123970046 | 0.369918699   | 0.31300813            |  |
| 19_d                                                                            | Bacteri | Bacteri | 0.092391017  | 0.114711334 | 0           | 0.339014151 | 0.817271958 | 0.123311567 | 0.501626016   | 0.331707317           |  |
| 20_d                                                                            | Bacteri | Bacteri | 0.011881272  | 0.076745968 | 0.253252791 | 0.351257541 | 0.97164616  | 0.119463563 | 0.4           | 0.369918699           |  |
| 21_d                                                                            | Bacteri | Bacteri | 0.004325414  | 0.06394526  | 0.235094524 | 0           | 0.927766146 | 0.115384555 | 0.411382114   | 0.332520325           |  |
| 22_d                                                                            | Bacteri | Bacteri | 0.0053728    | 0           | 0.065154918 | 0.233226345 | 0.929891524 | 0.113826772 | 0.404878049   | 0.371544715           |  |
| 23_d                                                                            | Bacteri | Bacteri | 0            | 0.05196818  | 0.087604647 | 0.278473112 | 0.864631674 | 0.113252466 | 0.318699187   | 0.258536585           |  |
| 24_d                                                                            | Bacteri | Bacteri | 0.027066119  | 0.104629283 | 0           | 0.245828533 | 0.972567831 | 0.109381207 | 0.899186992   | 0.25203252            |  |
| 25_d                                                                            | Bacteri | Bacteri | 0            | 0.116599337 | 0.268246561 | 0.330462256 | 0.944921176 | 0.10693146  | 0.359349593   | 0.309756098           |  |
| 26_d                                                                            | Bacteri | Bacteri | 0.002354659  | 0           | 0.073293788 | 0.21509536  | 0.964335824 | 0.106370088 | 0.336385366   | 0.309756098           |  |
| 27_d                                                                            | Bacteri | Bacteri | 0.032505371  | 0.046971201 | 0           | 0.240278073 | 0.801946854 | 0.103886351 | 0.722764228   | 0.565853659           |  |
| 28_d                                                                            | Bacteri | Bacteri | 0.117006024  | 0           | 0.147996596 | 0.319150603 | 0.861876097 | 0.101017289 | 0.359349593   | 0.334146341           |  |
| 29_d                                                                            | Bacteri | Bacteri | 0.0154471881 | 0.130907556 | 0.215845452 | 0           | 0.992326945 | 0.100198785 | 0.576422764   | 0.251219512           |  |
| 30_d                                                                            | Bacteri | Bacteri | 0.003376937  | 0.079387598 | 0           | 0.202788849 | 0.981521756 | 0.099705956 | 0.276422764   | 0.257723577           |  |
| 31_d                                                                            | Bacteri | Bacteri | 0.081460367  | 0.12470783  | 0.279834188 | 0           | 0.904139076 | 0.09918691  | 0.814634146   | 0.252845528           |  |
| 32_d                                                                            | Bacteri | Bacteri | 0.041914865  | 0           | 0.099050416 | 0.239401589 | 0.944121829 | 0.098743312 | 0.825203252   | 0.369105691           |  |
| 33_d                                                                            | Bacteri | Bacteri | 0            | 0.058389053 | 0.08340845  | 0.253551838 | 0.844369203 | 0.097581392 | 0.358536585   | 0.25203252            |  |
| 34_d                                                                            | Bacteri | Bacteri | 0.0111752145 | 0.295358974 | 0.306649989 | 0.793295496 | 0.097448922 | 0.336585366 | 0.251219512   |                       |  |
| 35_d                                                                            | Bacteri | Bacteri | 0.029409561  | 0           | 0.087155548 | 0.23218857  | 0.948679144 | 0.096904498 | 0.722764228   | 0.258536585           |  |
| 36_d                                                                            | Bacteri | Bacteri | 0            | 0.048883358 | 0.17326723  | 0.239705352 | 0.970179351 | 0.095410997 | 0.359349593   | 0.252845528           |  |
| 37_d                                                                            | Bacteri | Bacteri | 0.022268124  | 0.094254489 | 0.211206385 | 0           | 0.981053202 | 0.094762572 | 0.42601626    | 0.252845528           |  |
| 38_d                                                                            | Bacteri | Bacteri | 0            | 0.14254242  | 0.205133171 | 0.330065385 | 0.964473646 | 0.093761472 | 0.460162602   | 0.369918699           |  |
| 39_d                                                                            | Bacteri | Bacteri | 0            | 0.038125728 | 0.06607506  | 0.214382938 | 0.865477583 | 0.088128605 | 0.288617886   | 0.278861789           |  |
| 40_d                                                                            | Bacteri | Bacteri | 0.076582864  | 0           | 0.158717037 | 0.251335956 | 0.998801539 | 0.087376546 | 0.62195122    | 0.258536585           |  |
| 41_d                                                                            | Bacteri | Bacteri | 0.074137919  | 0           | 0.105454162 | 0.248811134 | 0.879395819 | 0.087336008 | 0.62195122    | 0.309756098           |  |
| 42_d                                                                            | Bacteri | Bacteri | 0.056668778  | 0           | 0.109921633 | 0.230653646 | 0.952252858 | 0.086992434 | 0.641463415   | 0.297560976           |  |
| 43_d                                                                            | Bacteri | Bacteri | 0.039755924  | 0.14422583  | 0.206873837 | 0.307395873 | 0.991491458 | 0.086556785 | 0.473170732   | 0.269105691           |  |
| 44_d                                                                            | Bacteri | Bacteri | 0.032874903  | 0.041753922 | 0           | 0.20110612  | 0.78946793  | 0.084115609 | 0.508943089   | 0.4                   |  |
| 45_d                                                                            | Bacteri | Bacteri | 0.128021265  | 0.186585795 | 0.266986772 | 0.371486405 | 0.985299159 | 0.08170164  | 0.370731707   | 0.369918699           |  |
| 46_d                                                                            | Bacteri | Bacteri | 0.044619261  | 0           | 0.066441916 | 0.207194647 | 0.848620797 | 0.081287693 | 0.38699187    | 0.255284553           |  |
| 47_d                                                                            | Bacteri | Bacteri | 0.042536155  | 0           | 0.185733871 | 0.204514319 | 0.835655744 | 0.080989082 | 0.460162602   | 0.332520325           |  |
| 48_d                                                                            | Bacteri | Bacteri | 0.032411456  | 0.074644448 | 0.107523267 | 0.73287022  | 0.855344802 | 0.075555552 | 0.9           | 0.392862927           |  |
| 49_d                                                                            | Bacteri | Bacteri | 0.015889585  | 0.034772553 | 0.038108974 | 0.245495837 | 0.679573089 | 0.069211518 | 0.473170732   | 0.334146341           |  |
| 50_d                                                                            | Bacteri | Bacteri | 0.093511349  | 0.184044756 | 0           | 0.224981329 | 0.954709739 | 0.06573499  | 0.403250303   | 0.25203252            |  |
| 51_d                                                                            | Bacteri | Bacteri | 0.106764786  | 0.122792022 | 0           | 0.228528283 | 0.846031977 | 0.061382254 | 0.517073171   | 0.297560976           |  |
| 52_d                                                                            | Bacteri | Bacteri | 0.135826107  | 0           | 0.220416102 | 0.24961324  | 0.926788298 | 0.056893566 | 0.52601626    | 0.371544715           |  |
| 53_d                                                                            | Bacteri | Bacteri | 0.184601111  | 0           | 0.256590113 | 0.291608441 | 0.961733295 | 0.053503865 | 0.54796748    | 0.334146341           |  |
| 54_d                                                                            | Bacteri | Bacteri | 0.145877766  | 0.171130851 | 0.179044719 | 0.311646317 | 0.766421797 | 0.050521952 | 0.369918699   | 0.334146341           |  |

Taxon1: relationship node  
Taxon2: relationship node  
Group 1: PM score of ASD cohort with ASD score 1 to 3 compared to NT  
Group 2: PM score of ASD cohort with ASD score 4 to 5 compared to NT  
Group 3: PM score of ASD cohort with ASD score 7 compared to NT  
Group 4: PM score of ASD cohort with ASD score 7 to 9 compared to NT  
R-square: the linear regression R-square  
coefficient: the linear regression coefficient  
Taxon1 detection rate: detection rate of taxon1  
Taxon2 detection rate: detection rate of taxon2

| Table13 Summary of the statistical results of the 20 significant changed microbial taxa across age |         |          |          |         |          |            |         |          |          |          |          |          |         |          |          |         |          |          |          |          |         |         |          |          |       |         |             |       |       |          |       |       |          |          |
|----------------------------------------------------------------------------------------------------|---------|----------|----------|---------|----------|------------|---------|----------|----------|----------|----------|----------|---------|----------|----------|---------|----------|----------|----------|----------|---------|---------|----------|----------|-------|---------|-------------|-------|-------|----------|-------|-------|----------|----------|
| Row.names                                                                                          | 1       |          |          | 2       |          |            | 3       |          |          | 4        |          |          | 5       |          |          | 6       |          |          | 7        |          |         | 8       |          |          | 9     |         |             |       |       |          |       |       |          |          |
|                                                                                                    | mean NT | mean ASD | p-value  | mean NT | mean ASD | p-value    | mean NT | mean ASD | p-value  | mean NT  | mean ASD | p-value  | mean NT | mean ASD | p-value  | mean NT | mean ASD | p-value  | mean NT  | mean ASD | p-value | mean NT | mean ASD | p-value  |       |         |             |       |       |          |       |       |          |          |
| g_Lachnospiraceae UCG-004                                                                          |         |          |          |         |          |            | 0.44%   | 0.77%    | 0.025199 | 0.45%    | 0.95%    | 0.020612 |         |          |          |         |          |          |          |          |         |         |          |          |       |         |             |       |       |          |       |       |          |          |
| g_Escherichia-Shigella                                                                             |         |          |          |         |          |            |         |          |          |          |          |          |         |          |          | 5.40%   | 7.38%    | 0.001517 |          |          |         | 6.77%   | 2.27%    | 0.025688 |       |         |             |       |       |          |       |       |          |          |
| g_Butyricoccus                                                                                     |         |          |          |         |          |            |         |          |          |          |          |          |         |          |          |         |          |          |          |          |         |         |          |          |       |         |             |       |       |          |       |       |          |          |
| g_Faecalibacterium                                                                                 | 11.98%  | 4.12%    | 0.03829  |         |          |            |         | 17.55%   | 13.00%   | 0.013482 |          |          |         |          |          |         |          |          |          |          |         |         |          | 0.46%    | 0.24% | 0.01217 |             |       |       |          |       |       |          |          |
| g_Parabacteroides                                                                                  |         |          |          |         |          |            |         |          |          |          |          |          |         |          |          |         |          |          |          |          |         |         |          |          |       |         |             |       |       |          |       |       |          |          |
| f_Enterobacteriaceae                                                                               |         |          |          |         |          |            |         |          |          |          |          |          |         |          |          |         |          |          |          |          |         |         |          |          |       |         |             |       |       |          |       |       |          |          |
| g_Lachnospiraceae NK4A136_group                                                                    |         |          |          |         |          |            |         |          |          |          |          |          |         |          |          | 2.75%   | 6.82%    | 0.014322 |          |          |         | 4.99%   | 5.13%    | 0.004266 | 7.21% | 3.53%   | 1.13724E-05 | 1.75% | 2.48% | 0.011476 |       | 1.69% | 1.70%    | 0.019414 |
| g_Bifidobacterium                                                                                  |         |          |          |         |          |            |         |          |          |          |          |          |         |          |          |         | 2.70%    | 5.00%    | 0.007976 |          |         |         |          |          |       |         |             |       |       |          |       |       |          |          |
| g_Haemophilus                                                                                      |         |          |          |         |          |            |         |          |          |          |          |          |         |          |          |         |          |          |          |          |         |         |          |          |       |         |             |       |       |          |       | 0.25% | 0.50%    | 0.039359 |
| g_Veillonella                                                                                      | 10.25%  | 19.99%   | 0.032053 | 1.69%   | 10.47%   | 5.7118E-05 | 3.60%   | 8.03%    | 0.003709 | 0.80%    | 5.48%    | 8.03E-05 | 0.76%   | 6.52%    | 0.001105 | 0.66%   | 3.87%    | 0.030332 |          |          |         |         |          |          |       |         |             |       |       |          | 0.47% | 2.76% | 0.047391 |          |
| f_Ruminococcaceae                                                                                  | 0.03%   | 0.14%    | 0.030366 |         |          |            |         | 0.16%    | 0.09%    | 0.015762 |          |          |         |          |          |         |          |          |          |          |         |         |          |          |       |         |             |       |       |          |       |       |          |          |
| g_Anaerostipes                                                                                     |         |          |          |         |          |            |         |          |          |          |          |          |         |          |          |         |          |          |          |          |         |         |          |          |       |         |             |       |       |          |       |       |          |          |
| g_Lachnospira                                                                                      |         |          |          |         |          |            |         | 1.87%    | 3.58%    | 0.014366 |          |          |         |          |          | 0.23%   | 0.43%    | 0.00098  |          |          |         |         |          |          |       |         |             |       |       |          |       |       |          |          |
| g_Blautia                                                                                          |         |          |          |         |          |            |         |          |          |          |          |          |         |          |          |         |          |          |          |          |         |         |          |          |       |         |             |       |       |          |       |       |          |          |
| g_Granulicatella                                                                                   |         |          |          |         |          |            |         |          |          |          |          |          |         |          |          |         |          |          |          |          |         |         |          |          |       |         |             |       |       |          |       |       |          |          |
| g_Romboutsia                                                                                       |         |          |          |         |          |            |         |          |          |          |          |          |         |          |          |         |          |          |          |          |         |         |          |          |       |         |             |       |       |          |       |       |          |          |
| g_Actinomyces                                                                                      |         |          |          |         |          |            |         |          |          |          |          |          |         |          |          |         |          |          |          |          |         |         |          |          |       |         |             |       |       |          |       |       |          |          |
| g_Roseburia                                                                                        |         |          |          |         |          |            |         |          |          |          |          |          |         |          |          |         |          |          |          |          |         |         |          |          |       |         |             |       |       |          |       |       |          |          |
| g_Incertae Sedis                                                                                   |         |          |          |         |          |            |         |          |          |          |          |          |         |          |          |         |          |          |          |          |         |         |          |          |       |         |             |       |       |          |       |       |          |          |
| g_Hungatella                                                                                       |         |          |          |         |          |            |         |          |          |          |          |          |         |          |          |         |          |          |          |          |         |         |          |          |       |         |             |       |       |          |       |       |          |          |

| Total proportion of the 20 microbial taxa in different age brackets |        |        |        |        |        |        |        |        |        |
|---------------------------------------------------------------------|--------|--------|--------|--------|--------|--------|--------|--------|--------|
| age bracket                                                         | 1      | 2      | 3      | 4      | 5      | 6      | 7      | 8      | 9      |
| NT                                                                  | 65.91% | 40.10% | 50.53% | 40.04% | 37.16% | 38.59% | 40.97% | 33.41% | 35.09% |
| ASD                                                                 | 62.42% | 55.85% | 50.09% | 45.66% | 46.73% | 46.45% | 39.02% | 37.09% | 35.70% |

| Table 14 Summary of the statistical results of the 39 significant changed GBM across age |                                                      |          |          |          |          |          |          |          |          |          |          |          |          |          |          |          |          |          |          |          |          |          |          |          |          |          |          |          |
|------------------------------------------------------------------------------------------|------------------------------------------------------|----------|----------|----------|----------|----------|----------|----------|----------|----------|----------|----------|----------|----------|----------|----------|----------|----------|----------|----------|----------|----------|----------|----------|----------|----------|----------|----------|
| No.                                                                                      | Row name                                             | 1        |          |          | 2        |          |          | 3        |          |          | 4        |          |          | 5        |          |          | 6        |          |          | 7        |          |          | 8        |          |          | 9        |          |          |
|                                                                                          |                                                      | mean NT  | mean ASD | p-value  | mean NT  | mean ASD | p-value  | mean NT  | mean ASD | p-value  | mean NT  | mean ASD | p-value  | mean NT  | mean ASD | p-value  | mean NT  | mean ASD | p-value  | mean NT  | mean ASD | p-value  | mean NT  | mean ASD | p-value  |          |          |          |
| 1                                                                                        | MGB004 Kynurenine synthesis                          | 1092.797 | 297.3598 | 0.021074 |          |          |          | 1160.483 | 423.7885 | 0.014966 |          |          |          |          |          |          |          |          |          |          |          |          |          |          |          |          |          |          |
| 2                                                                                        | MGB025 Nitric oxide synthesis I (NO synthase)        | 48.63158 | 3.12     | 0.00303  |          |          |          | 196.8714 | 2.631285 | 3.06E-07 |          |          |          |          |          |          |          |          |          |          |          |          |          |          |          |          |          |          |
| 3                                                                                        | MGB045 Acetate synthesis III                         |          |          |          | 78271.83 | 94693.84 | 0.039124 | 92155.87 | 86980.81 | 0.02902  |          |          |          |          |          |          | 76626.3  | 83367.28 | 0.018106 |          |          |          | 3        | 2.586207 | 0.007224 |          |          |          |
| 4                                                                                        | MGB047 Acetate degradation                           |          |          |          | 34185.86 | 33968.58 | 0.035049 |          |          |          |          |          |          |          |          |          |          |          |          |          |          |          |          |          |          |          |          |          |
| 5                                                                                        | MGB050 Glutamate degradation I                       |          |          |          | 5282.641 | 14521.4  | 5.68E-05 |          |          |          |          |          |          | 4234.183 | 11689.16 | 0.028959 |          |          |          |          |          |          |          |          |          |          |          |          |
| 6                                                                                        | MGB028 Nitric oxide degradation II (NO reductase)    |          |          |          | 1300.1   | 6200.144 | 0.142984 | 1576.387 | 4628.157 | 0.023838 |          |          |          | 715.2168 | 4315.926 | 0.012537 |          |          |          |          |          |          |          |          |          |          |          |          |
| 7                                                                                        | MGB009 Histamine synthesis                           |          |          |          | 6216.852 | 5725.541 | 0.171932 |          |          |          |          |          |          |          |          |          |          |          |          |          |          |          |          |          |          |          |          |          |
| 8                                                                                        | MGB031 17- $\beta$ -Estradiol degradation            |          |          |          |          |          |          | 56799.02 | 52701.34 | 0.044281 |          |          |          |          |          |          | 46593.32 | 49709.97 | 0.039599 |          |          |          |          |          |          |          |          |          |
| 9                                                                                        | MGB055 Propionate synthesis III                      |          |          |          |          |          |          | 35100.37 | 47227.68 | 0.015738 |          |          |          |          |          |          | 33119.66 | 40996.46 | 0.022824 |          |          |          |          | 34050.77 | 53703.55 | 0.000129 |          |          |
| 10                                                                                       | MGB044 Acetate synthesis II                          |          |          |          |          |          |          | 69193.54 | 44421.63 | 0.033508 |          |          |          |          |          |          |          |          |          |          |          |          |          |          |          |          |          |          |
| 11                                                                                       | MGB034 Isovaleric acid synthesis I (KADH pathway)    |          |          |          |          |          |          | 21377.53 | 29567.96 | 0.001956 |          |          |          |          |          |          | 17763.45 | 26259.03 | 0.012571 |          |          |          |          | 19892.22 | 33138.89 | 0.01256  |          |          |
| 12                                                                                       | MGB024 DOPAC synthesis                               |          |          |          |          |          |          | 19395.03 | 16628.75 | 0.001334 |          |          |          |          |          |          |          |          |          |          |          |          |          |          |          |          |          |          |
| 13                                                                                       | MGB051 Glutamate degradation II                      |          |          |          |          |          |          | 6278.562 | 3765.424 | 0.021857 | 5264.89  | 4397.712 | 0.008437 |          |          |          | 4380.876 | 3094.99  | 0.000249 | 6386.679 | 3447.318 | 0.037749 |          |          |          |          |          |          |
| 14                                                                                       | MGB015 p-Cresol synthesis                            |          |          |          |          |          |          |          |          |          |          |          |          |          |          |          |          |          |          |          |          |          |          |          | 83274.66 | 118679.3 | 0.000268 |          |
| 15                                                                                       | MGB056 Propionate degradation I                      |          |          |          |          |          |          |          |          |          | 2259.034 | 247.979  | 5.97E-06 | 1231.779 | 2904.984 | 0.042978 | 1478.688 | 88.24674 | 5.86E-06 | 1161.887 | 870.508  | 0.001545 |          |          | 1859.713 | 1104.982 | 0.000152 |          |
| 16                                                                                       | MGB023 Dopamine degradation                          |          |          |          |          |          |          |          |          |          |          |          |          |          |          |          | 2386.973 | 1767.557 | 0.048214 |          |          |          |          |          | 397.3296 | 506.3824 | 0.012873 |          |
| 17                                                                                       | MGB021 GABA synthesis II                             |          |          |          |          |          |          |          |          |          |          |          |          |          |          |          |          |          |          | 5050.97  | 3532.61  | 0.011751 | 5159.807 | 2860.345 | 0.000162 | 4398.596 | 5065.86  | 0.00462  |
| 18                                                                                       | MGB020 GABA synthesis I                              |          |          |          |          |          |          |          |          |          |          |          |          |          |          |          | 2979.323 | 3440.453 | 0.002932 | 2770.88  | 1635.698 | 0.005035 | 2434.388 | 2124.651 | 0.036131 |          |          |          |
| 19                                                                                       | MGB016 p-Cresol degradation                          |          |          |          |          |          |          |          |          |          | 1687.501 | 1012.833 | 0.033167 | 398.9685 | 2864.111 | 0.041861 | 1099.75  | 629.1248 | 0.003041 | 828.4491 | 368.7868 | 0.00438  |          |          | 320.7989 | 78.82941 | 0.003953 |          |
| 20                                                                                       | MGB048 Propionate synthesis I                        |          |          |          |          |          |          |          |          |          |          |          |          |          |          |          | 1478.989 | 1721.478 | 0.001436 | 2286.921 | 1605.805 | 0.004333 |          |          |          |          |          |          |
| 21                                                                                       | MGB010 Histamine degradation                         |          |          |          |          |          |          |          |          |          |          |          |          |          |          |          | 1096.704 | 1232.576 | 0.030099 | 1481.074 | 651.145  | 0.000279 |          |          |          |          |          |          |
| 22                                                                                       | MGB026 Nitric oxide synthesis II (nitrite reductase) |          |          |          |          |          |          |          |          |          | 696.2562 | 653.8108 | 0.043096 |          |          |          |          |          |          |          |          |          |          |          | 555.3852 | 805.9735 | 0.031165 |          |
| 23                                                                                       | MGB052 Butyrate synthesis I                          |          |          |          |          |          |          |          |          |          |          |          |          |          |          |          |          |          |          |          |          |          |          |          | 23393.96 | 30034.2  | 0.003496 |          |
| 24                                                                                       | MGB007 Glutamate synthesis II                        |          |          |          |          |          |          |          |          |          |          |          |          |          |          |          |          |          |          |          |          |          |          |          | 101169.1 | 122042.4 | 0.006389 |          |
| 25                                                                                       | MGB038 Inositol degradation                          |          |          |          |          |          |          |          |          |          |          |          |          | 7386.579 | 7494.644 | 0.035399 |          |          |          |          |          |          |          |          |          |          |          |          |
| 26                                                                                       | MGB006 Glutamate synthesis I                         |          |          |          |          |          |          |          |          |          |          |          |          |          |          |          |          |          |          |          |          |          |          |          |          | 100197.7 | 118560.9 | 0.004365 |
| 27                                                                                       | MGB033 Quinolinic acid degradation                   |          |          |          |          |          |          |          |          |          |          |          |          |          |          |          | 79722.27 | 85805.27 | 0.005075 |          |          |          |          |          |          | 84853.1  | 98243.76 | 0.046034 |
| 28                                                                                       | MGB035 Isovaleric acid synthesis II (KADC pathway)   |          |          |          |          |          |          |          |          |          |          |          |          |          |          |          |          |          |          |          |          |          |          |          |          |          |          |          |
| 29                                                                                       | MGB036 S-Adenosylmethionine (SAM) synthesis          |          |          |          |          |          |          |          |          |          |          |          |          | 90423.15 | 105440.7 | 0.035302 | 89667.01 | 97680.31 | 0.001664 |          |          |          |          |          |          |          |          |          |
| 30                                                                                       | MGB049 Tryptophan degradation                        |          |          |          |          |          |          |          |          |          |          |          |          | 10332.87 | 9637.566 | 0.025768 |          |          |          |          |          |          |          |          |          |          |          |          |
| 31                                                                                       | MGB037 Inositol synthesis                            |          |          |          |          |          |          |          |          |          | 33992.74 | 39414.31 | 0.014555 |          |          |          |          |          |          |          |          |          |          |          |          | 35428.22 | 45181.6  | 0.002122 |
| 32                                                                                       | MGB027 Nitric oxide degradation I (NO dioxygenase)   |          |          |          |          |          |          |          |          |          |          |          |          |          |          |          | 4375.189 | 10843.07 | 0.00012  |          |          |          |          |          |          |          |          |          |
| 33                                                                                       | MGB019 GABA degradation                              |          |          |          |          |          |          |          |          |          |          |          |          |          |          |          |          |          |          |          |          |          |          |          | 11257.43 | 6400.679 | 0.041149 |          |
| 34                                                                                       | MGB005 Tryptophan synthesis                          |          |          |          |          |          |          |          |          |          |          |          |          |          |          |          | 57626.33 | 65420.19 | 0.008114 |          |          |          |          |          |          | 56928.03 | 77007.84 | 0.000511 |
| 35                                                                                       | MGB040 Menaquinone synthesis (vitamin K2) I          |          |          |          |          |          |          |          |          |          |          |          |          | 23046.35 | 35277.73 | 0.014219 |          |          |          |          |          |          |          |          |          | 25949.26 | 37159.62 | 0.001383 |
| 36                                                                                       | MGB029 ClpB (ATP-dependent chaperone protein)        |          |          |          |          |          |          |          |          |          |          |          |          |          |          |          | 82244.97 | 86773.31 | 0.009216 |          |          |          |          |          |          |          |          |          |
| 37                                                                                       | MGB032 Quinolinic acid synthesis                     |          |          |          |          |          |          |          |          |          |          |          |          |          |          |          | 70137.28 | 72081.29 | 0.036633 |          |          |          |          |          |          | 69053.07 | 82871.76 | 0.018522 |
| 38                                                                                       | MGB039 g-Hydroxybutyric acid (GHB) degradation       |          |          |          |          |          |          |          |          |          |          |          |          |          |          |          |          |          |          |          |          |          |          |          | 3822.884 | 6090.431 | 0.003407 | 4356.258 |
| 39                                                                                       | MGB043 Acetate synthesis I                           |          |          |          |          |          |          |          |          |          |          |          |          | 78948.7  | 93955.13 | 0.013526 | 80907.01 | 86281.85 | 0.006756 |          |          |          |          |          |          |          | 4179.57  | 0.012649 |

[illegible]

Lou M, *et al.* *Gut* 2022; 71:1588–1599. doi: 10.1136/gutjnl-2021-325115

[illegible]

Table 16 Summary of the statistical results of correlations between bacterial taxa and clinical phenotypes according to spearman's rank correlations analysis

[illegible]



Lou M, *et al.* *Gut* 2022; 71:1588–1599. doi: 10.1136/gutjnl-2021-325115

Lou M, *et al.* Gut 2022; 71:1588–1599. doi: 10.1136/gutjnl-2021-325115

Lou M, *et al.* *Gut* 2022; 71:1588–1599. doi: 10.1136/gutjnl-2021-325115

|         |              |               |                            |
|---------|--------------|---------------|----------------------------|
| allergy | skin_allergy | respiratory ? | Antibiotic within 3 months |
|---------|--------------|---------------|----------------------------|

Lou M, *et al.* *Gut* 2022; 71:1588–1599. doi: 10.1136/gutjnl-2021-325115

Lou M, *et al.* *Gut* 2022; 71:1588–1599. doi: 10.1136/gutjnl-2021-325115

|                                                                              |                                                  |            |            |           |            |            |  |  |  |  |            |  |  |  |  |  |           |           |  |  |            |  |  |  |  |  |  |
|------------------------------------------------------------------------------|--------------------------------------------------|------------|------------|-----------|------------|------------|--|--|--|--|------------|--|--|--|--|--|-----------|-----------|--|--|------------|--|--|--|--|--|--|
|                                                                              | FASN-ELONG-PWY fatty acid elongation - saturated |            |            |           |            |            |  |  |  |  | 0.00112881 |  |  |  |  |  | 0.0042711 | 0.0072821 |  |  | 0.00811991 |  |  |  |  |  |  |
|                                                                              | AcCoA                                            | 0.00001017 | 0.00000881 | 0.000001  | 0.00001081 | 0.000001   |  |  |  |  | 0.00314281 |  |  |  |  |  | 0.0007121 | 0.0024891 |  |  | 0.00011991 |  |  |  |  |  |  |
|                                                                              | AcCoA                                            | 0.01142301 | 0.0000721  | 0.0024251 | 0.0000001  | 0.00244561 |  |  |  |  | 0.00314281 |  |  |  |  |  | 0.0007121 | 0.0024891 |  |  | 0.00011991 |  |  |  |  |  |  |
|                                                                              | AcCoA                                            | 0.01142301 | 0.0000721  | 0.0024251 | 0.0000001  | 0.00244561 |  |  |  |  | 0.00314281 |  |  |  |  |  | 0.0007121 | 0.0024891 |  |  | 0.00011991 |  |  |  |  |  |  |
| DENOVOPURINE2-PWY superpathway of purine nucleotides de novo biosynthesis II | AcCoA                                            | 0.01142301 | 0.0000721  | 0.0024251 | 0.0000001  | 0.00244561 |  |  |  |  | 0.00314281 |  |  |  |  |  | 0.0007121 | 0.0024891 |  |  | 0.00011991 |  |  |  |  |  |  |
|                                                                              | AcCoA                                            | 0.01142301 | 0.0000721  | 0.0024251 | 0.0000001  | 0.00244561 |  |  |  |  | 0.00314281 |  |  |  |  |  | 0.0007121 | 0.0024891 |  |  | 0.00011991 |  |  |  |  |  |  |
|                                                                              | AcCoA                                            | 0.01142301 | 0.0000721  | 0.0024251 | 0.0000001  | 0.00244561 |  |  |  |  | 0.00314281 |  |  |  |  |  | 0.0007121 | 0.0024891 |  |  | 0.00011991 |  |  |  |  |  |  |
|                                                                              | AcCoA                                            | 0.01142301 | 0.0000721  | 0.0024251 | 0.0000001  | 0.00244561 |  |  |  |  | 0.00314281 |  |  |  |  |  | 0.0007121 | 0.0024891 |  |  | 0.00011991 |  |  |  |  |  |  |
| COXN-PWY industrial amino acid biosynthesis A pathway                        | AcCoA                                            | 0.01142301 | 0.0000721  | 0.0024251 | 0.0000001  | 0.00244561 |  |  |  |  | 0.00314281 |  |  |  |  |  | 0.0007121 | 0.0024891 |  |  | 0.00011991 |  |  |  |  |  |  |
|                                                                              | AcCoA                                            | 0.01142301 | 0.0000721  | 0.0024251 | 0.0000001  | 0.00244561 |  |  |  |  | 0.00314281 |  |  |  |  |  | 0.0007121 | 0.0024891 |  |  | 0.00011991 |  |  |  |  |  |  |
|                                                                              | AcCoA                                            | 0.01142301 | 0.0000721  | 0.0024251 | 0.0000001  | 0.00244561 |  |  |  |  | 0.00314281 |  |  |  |  |  | 0.0007121 | 0.0024891 |  |  | 0.00011991 |  |  |  |  |  |  |
|                                                                              | AcCoA                                            | 0.01142301 | 0.0000721  | 0.0024251 | 0.0000001  | 0.00244561 |  |  |  |  | 0.00314281 |  |  |  |  |  | 0.0007121 | 0.0024891 |  |  | 0.00011991 |  |  |  |  |  |  |
| ARGN-PWY L-arginine biosynthesis Lys L-ornithine                             | AcCoA                                            | 0.01142301 | 0.0000721  | 0.0024251 | 0.0000001  | 0.00244561 |  |  |  |  | 0.00314281 |  |  |  |  |  | 0.0007121 | 0.0024891 |  |  | 0.00011991 |  |  |  |  |  |  |
|                                                                              | AcCoA                                            | 0.01142301 | 0.0000721  | 0.0024251 | 0.0000001  | 0.00244561 |  |  |  |  | 0.00314281 |  |  |  |  |  | 0.0007121 | 0.0024891 |  |  | 0.00011991 |  |  |  |  |  |  |
|                                                                              | AcCoA                                            | 0.01142301 | 0.0000721  | 0.0024251 | 0.0000001  | 0.00244561 |  |  |  |  | 0.00314281 |  |  |  |  |  | 0.0007121 | 0.0024891 |  |  | 0.00011991 |  |  |  |  |  |  |
|                                                                              | AcCoA                                            | 0.01142301 | 0.0000721  | 0.0024251 | 0.0000001  | 0.00244561 |  |  |  |  | 0.00314281 |  |  |  |  |  | 0.0007121 | 0.0024891 |  |  | 0.00011991 |  |  |  |  |  |  |
