# Supplementary material
Source: HighWire-hosted journal article supplement (https://gut.bmj.com/content/71/8/1588)

FigureS1

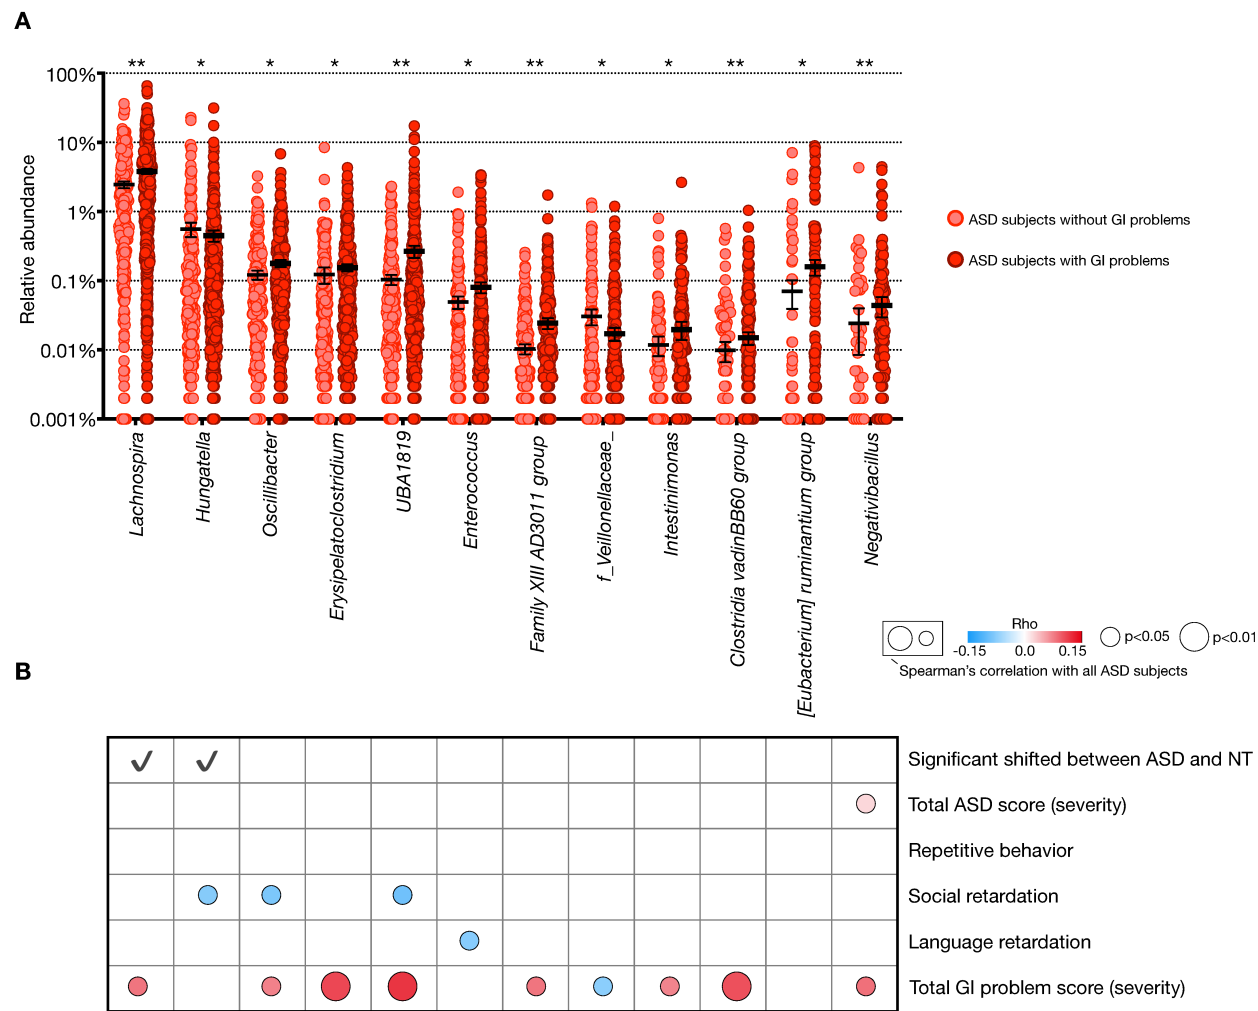

FigureS2

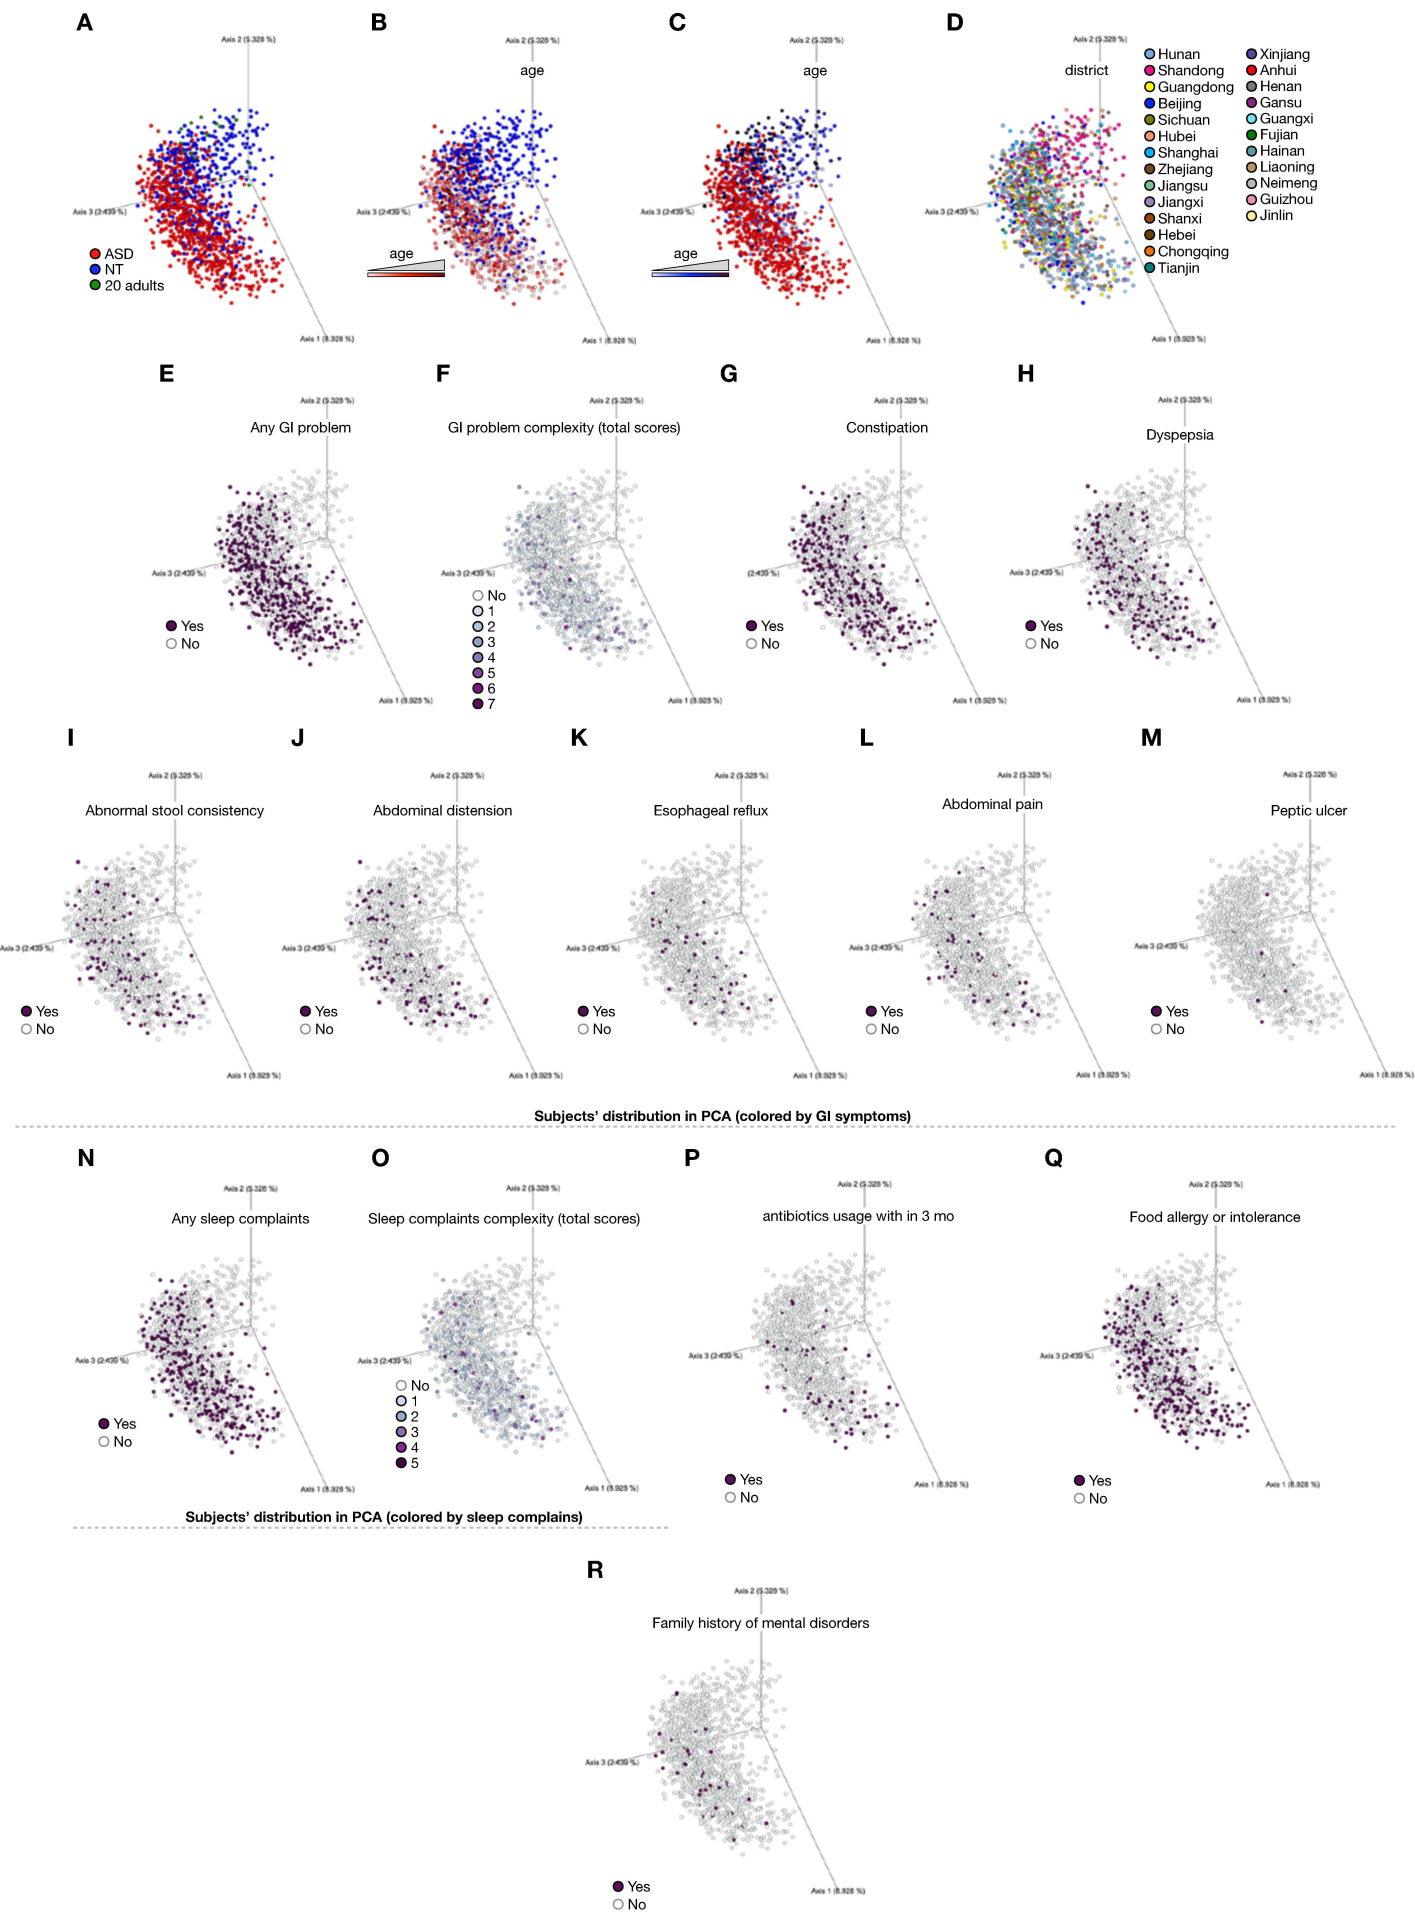

FigureS3

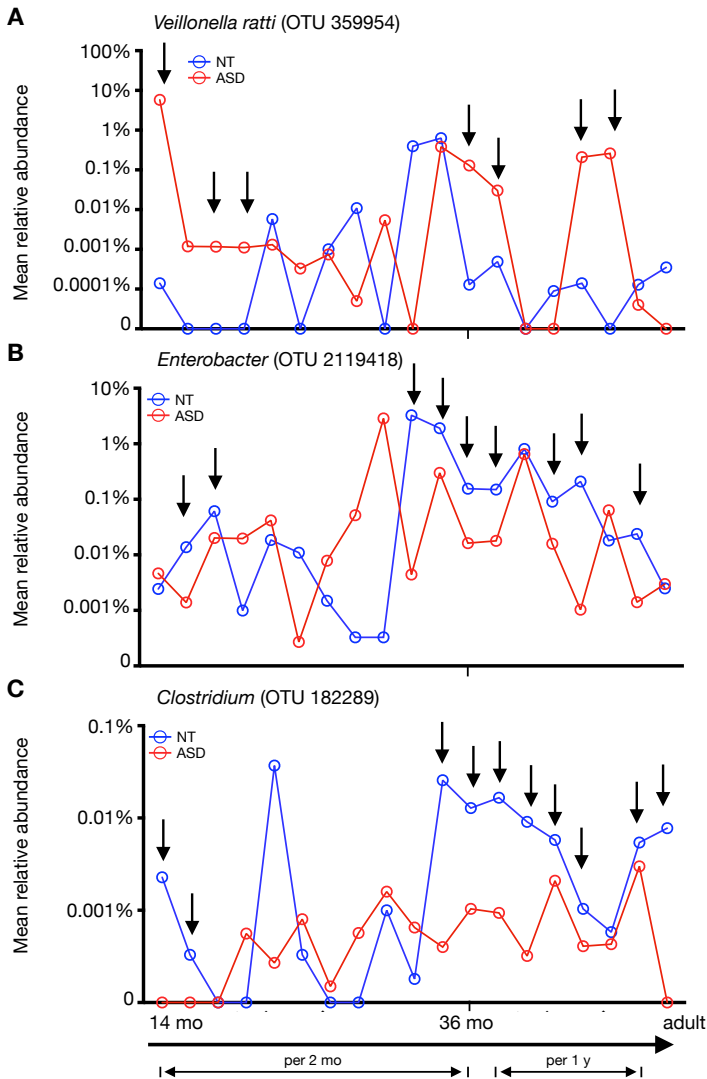

FigureS4

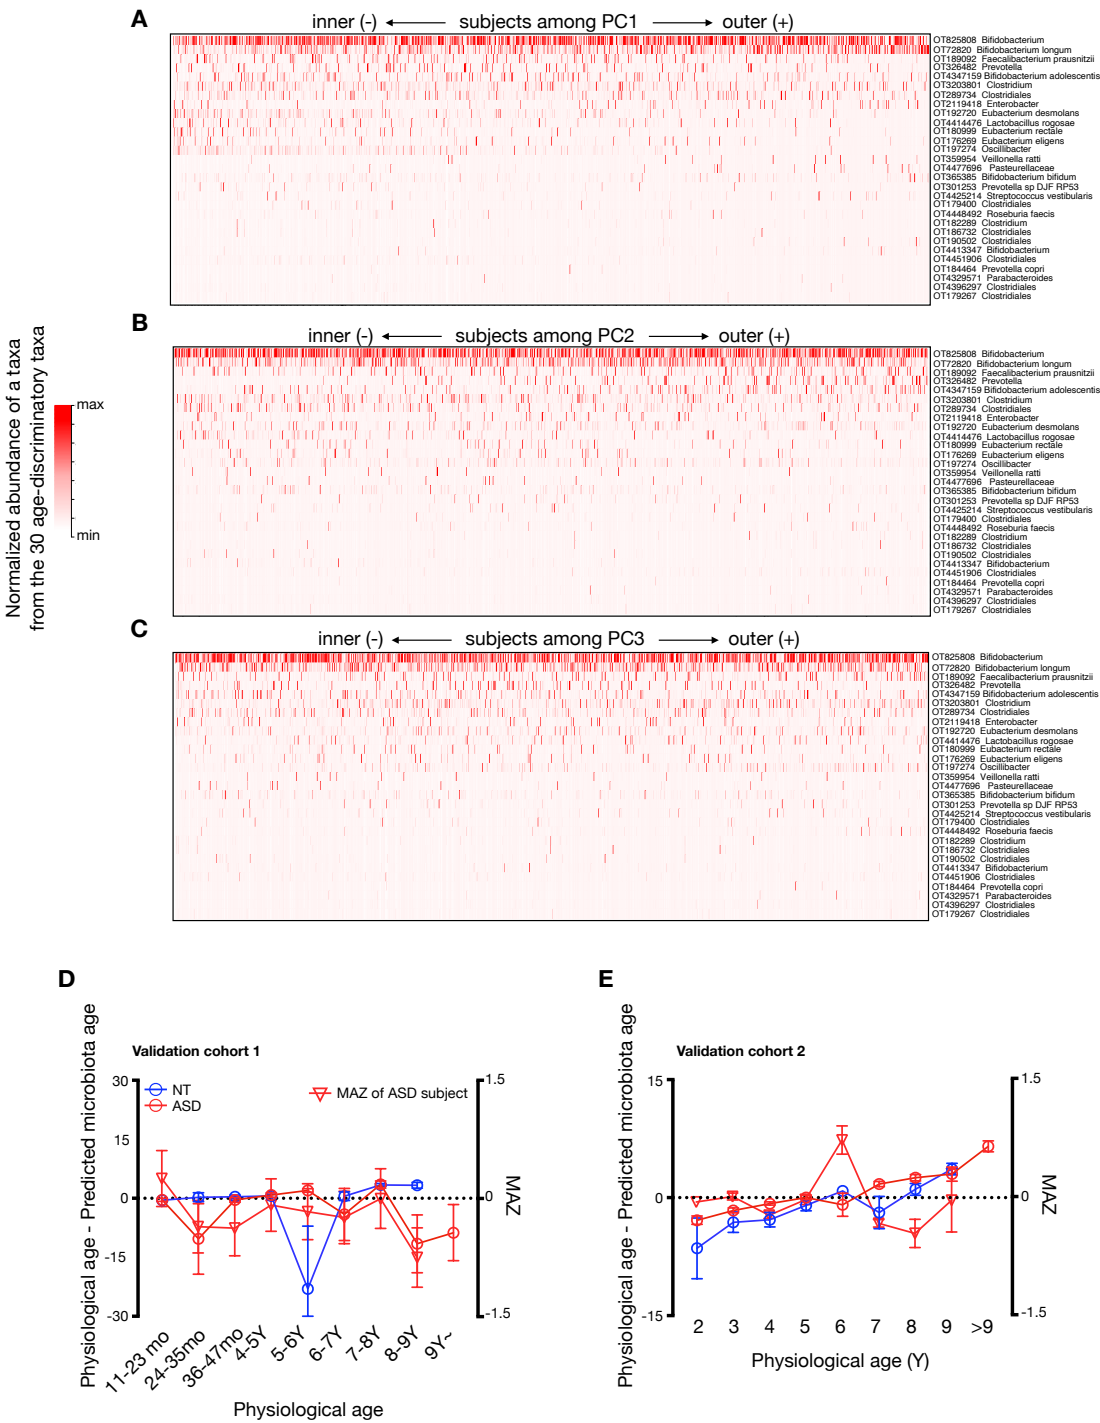



FigureS5

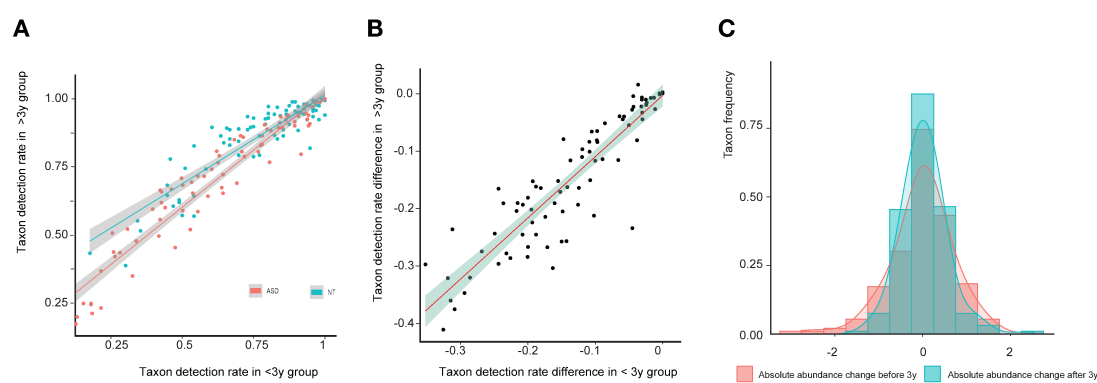

FigureS6

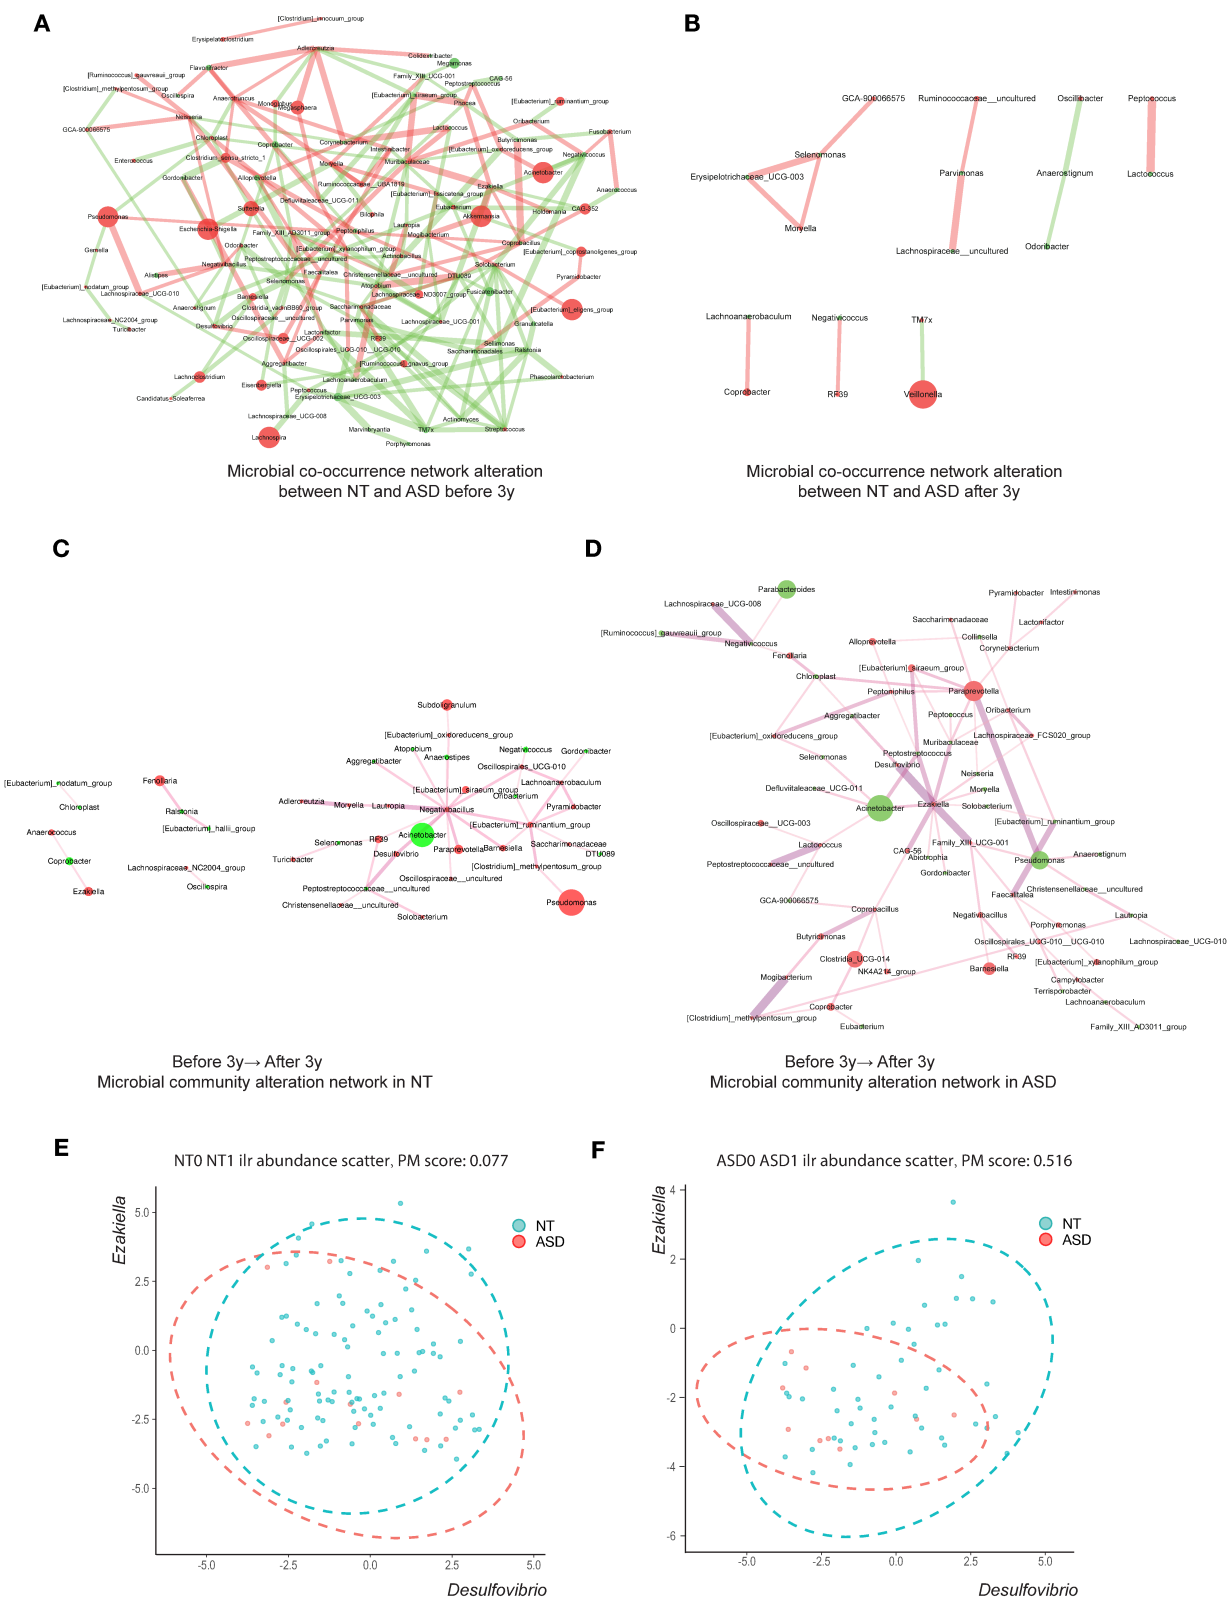

FigureS7

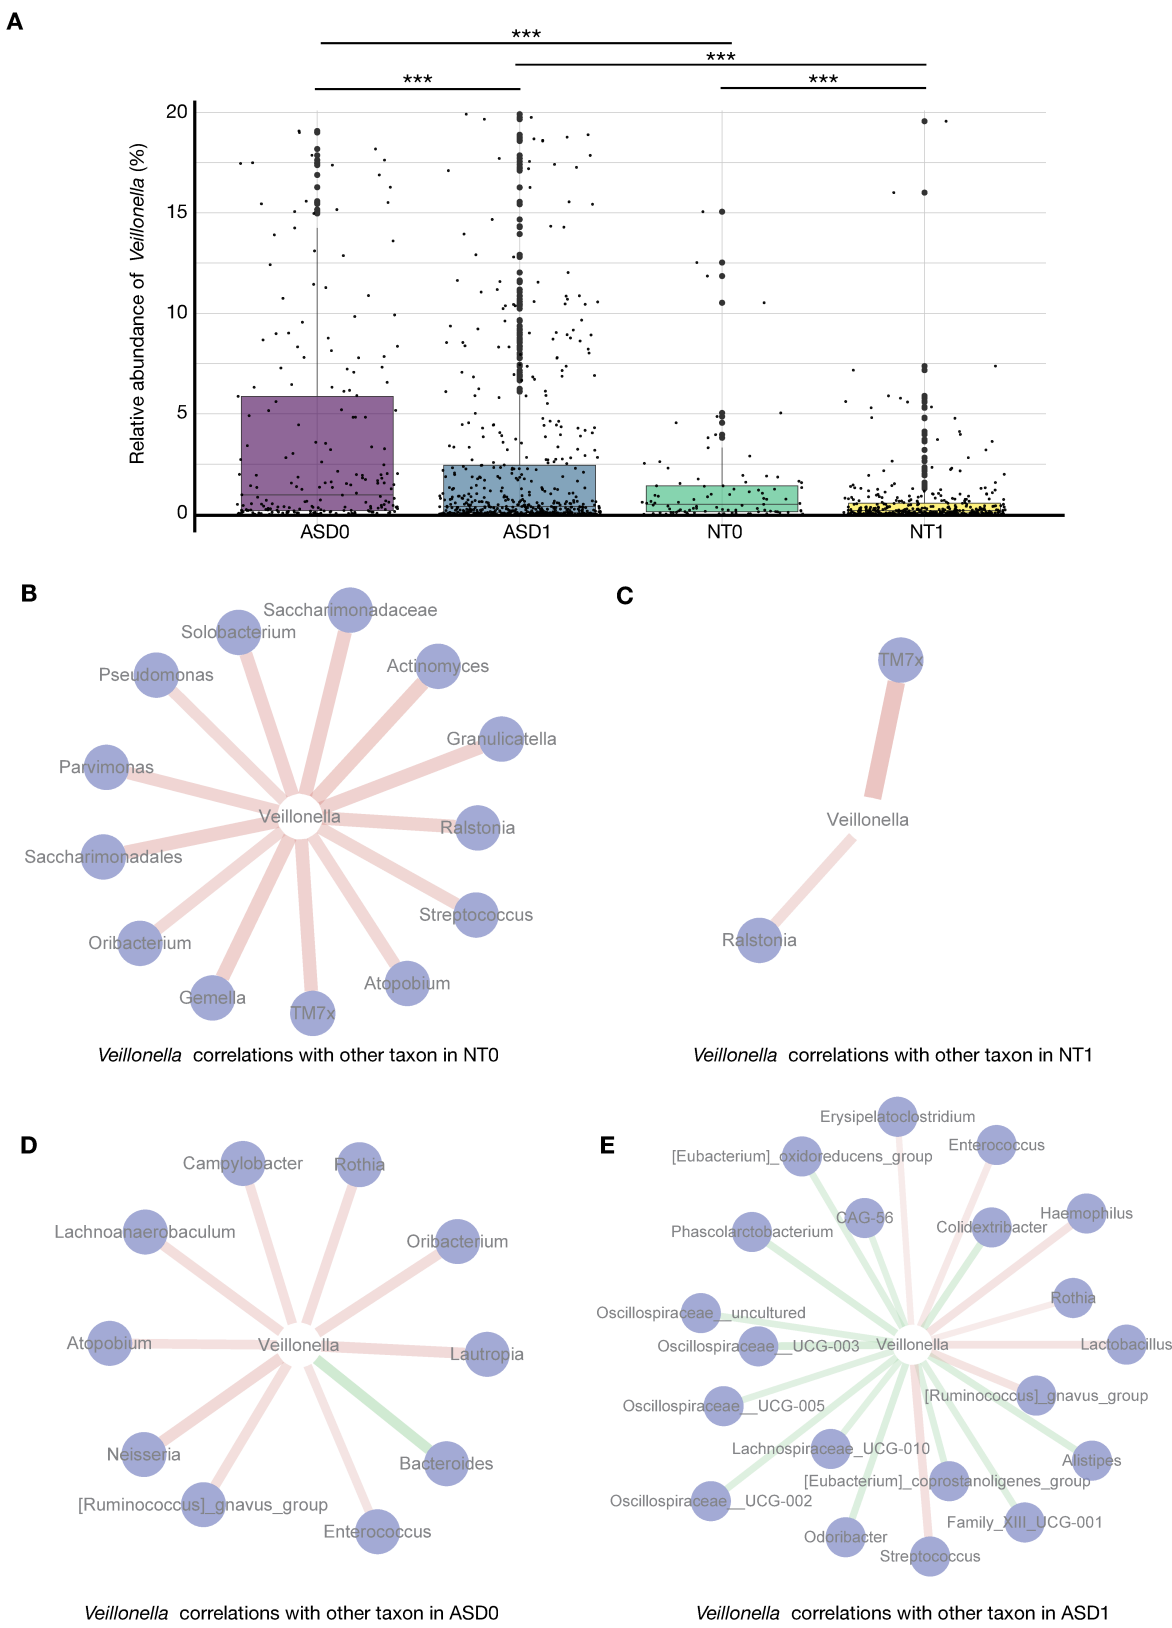

FigureS8

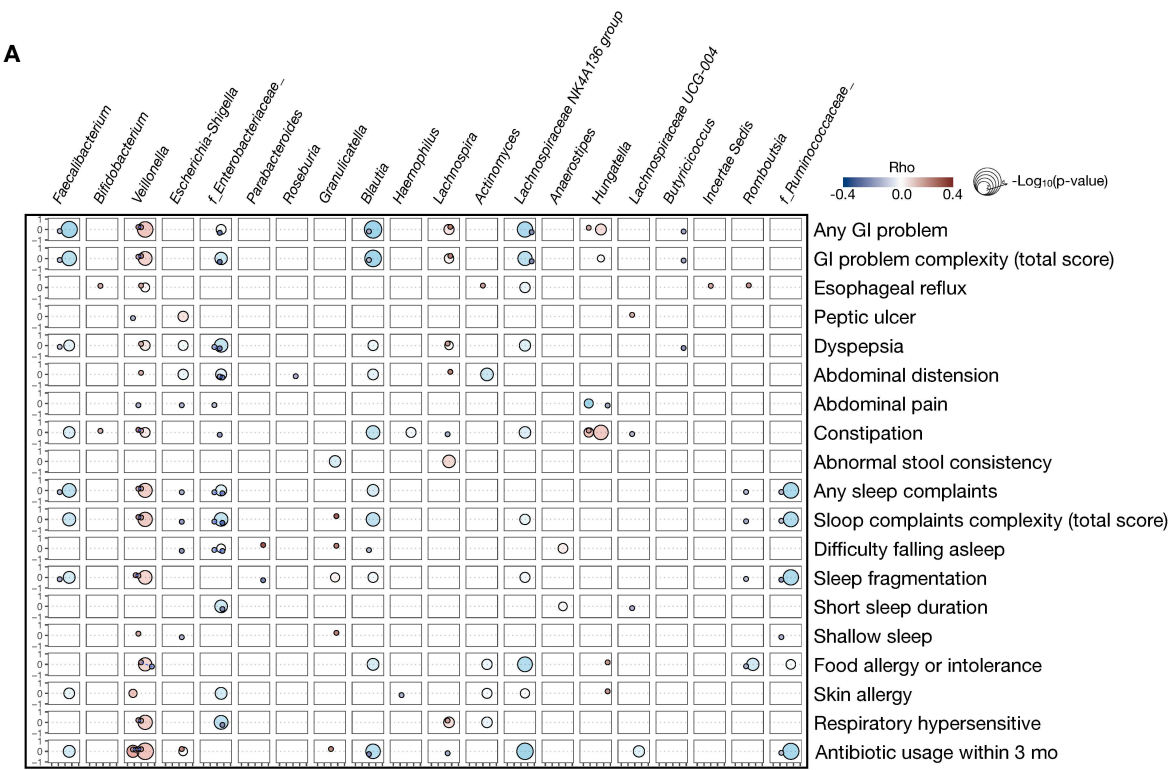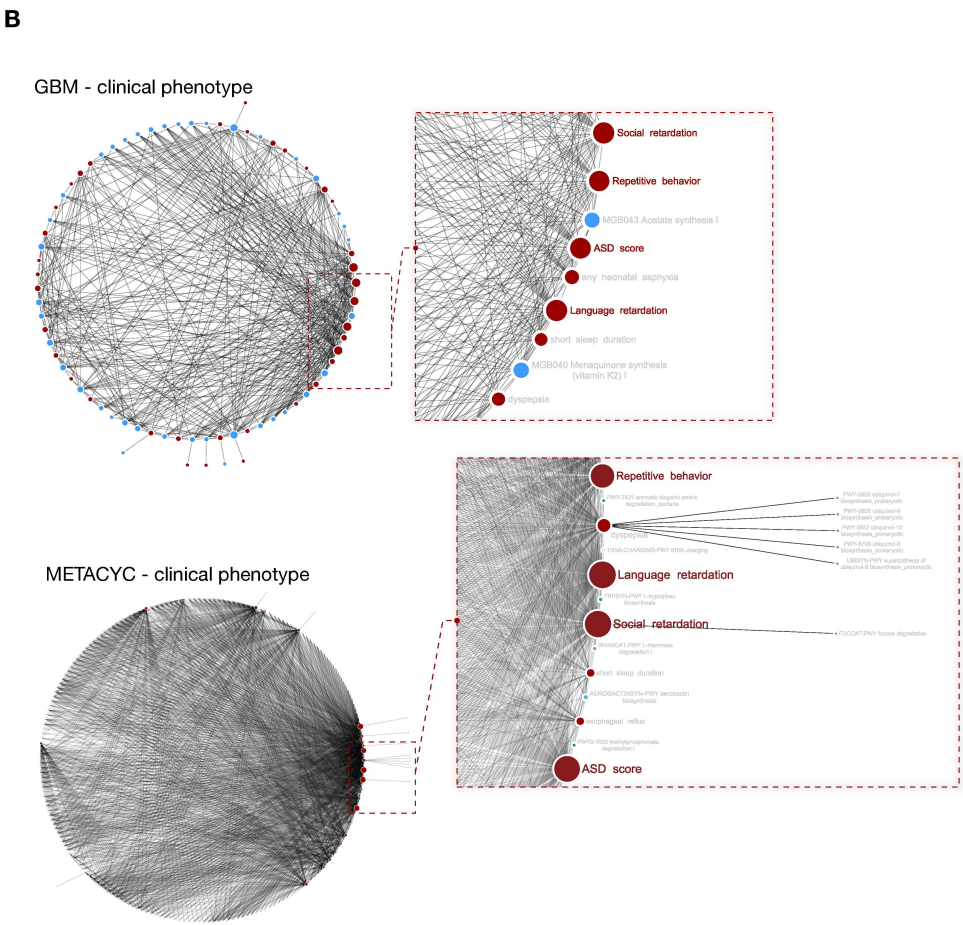

FigureS9

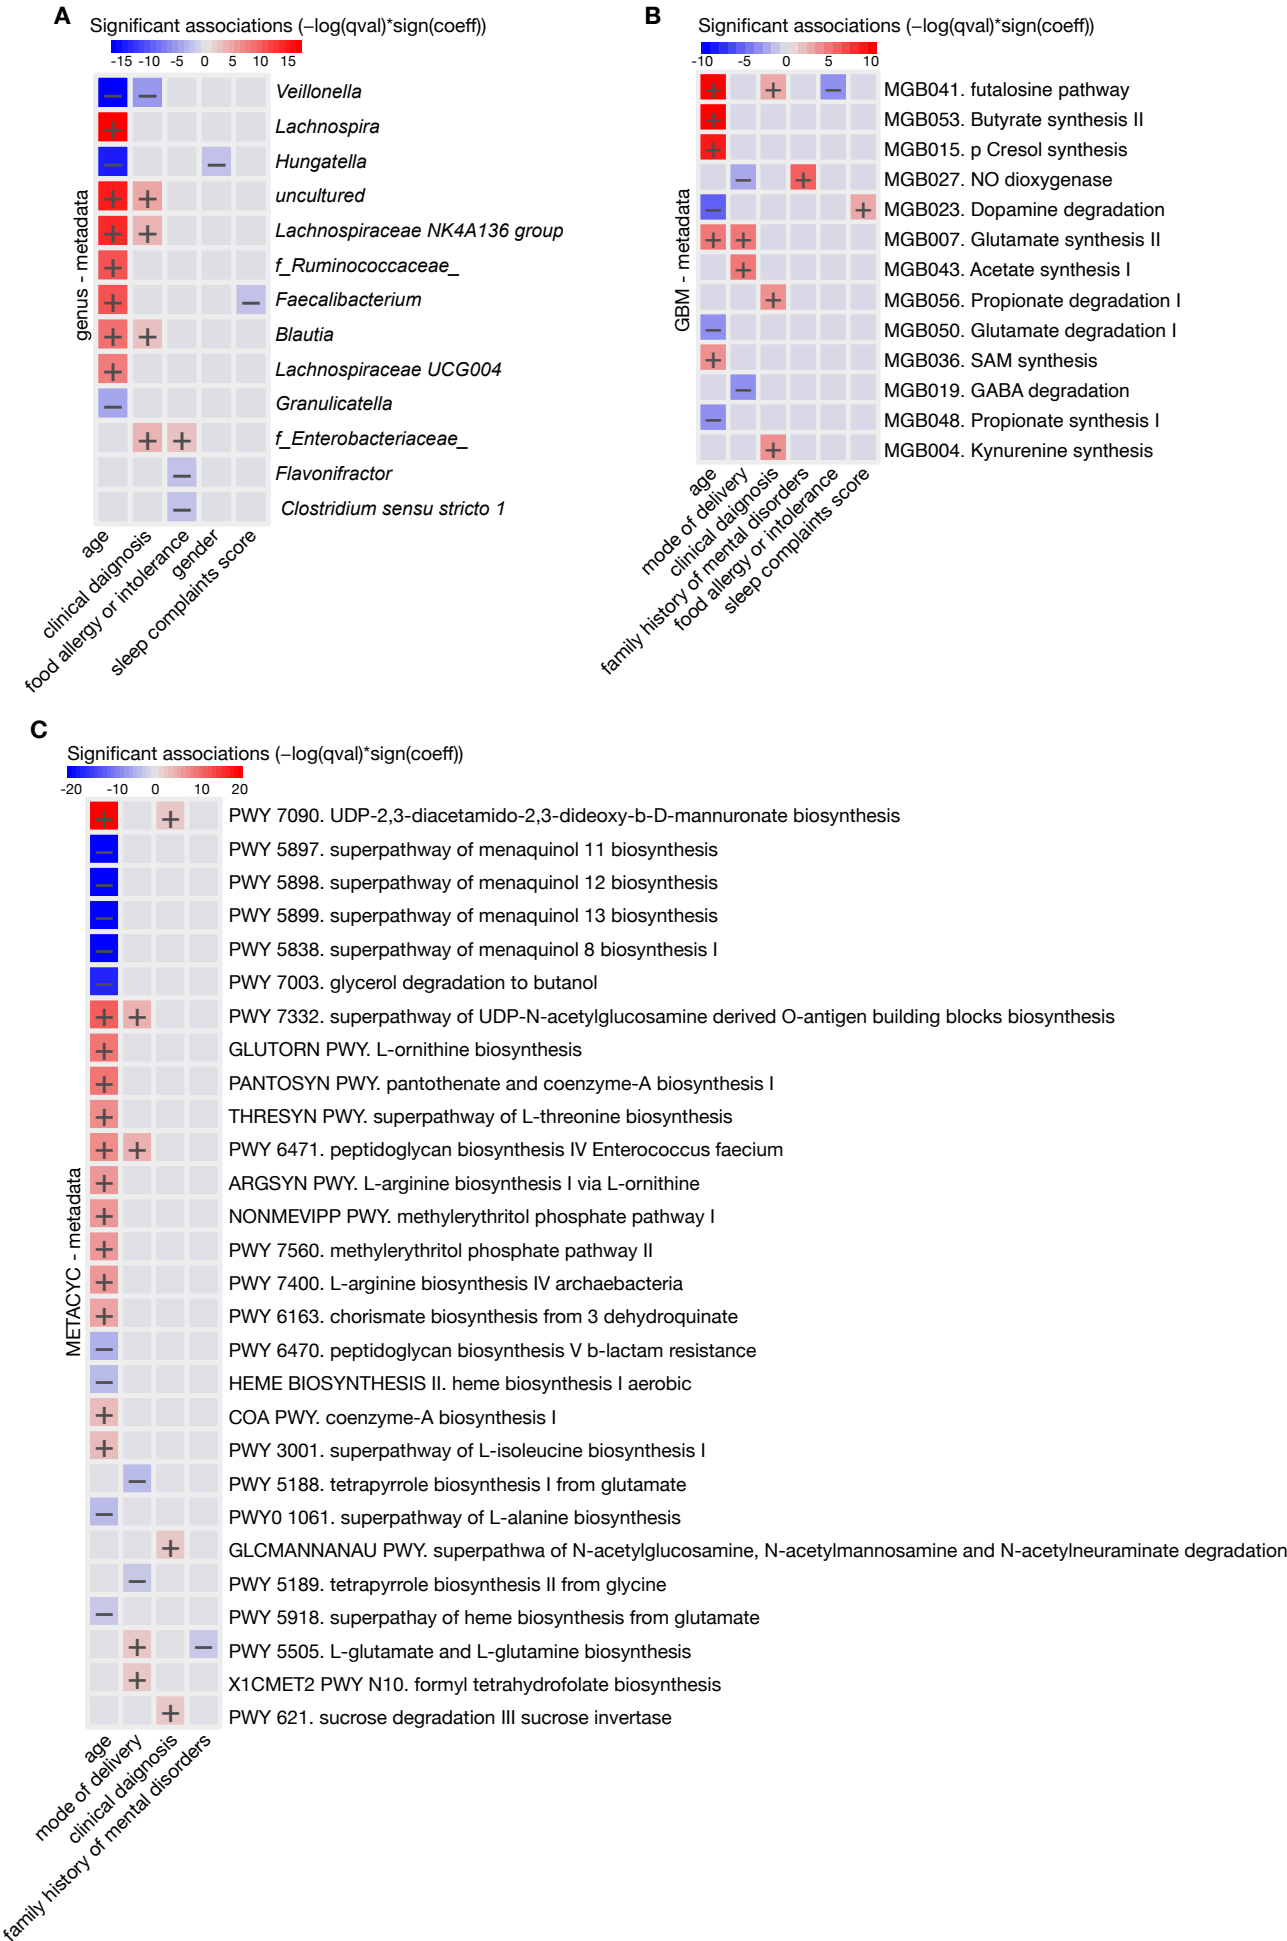

FigureS10

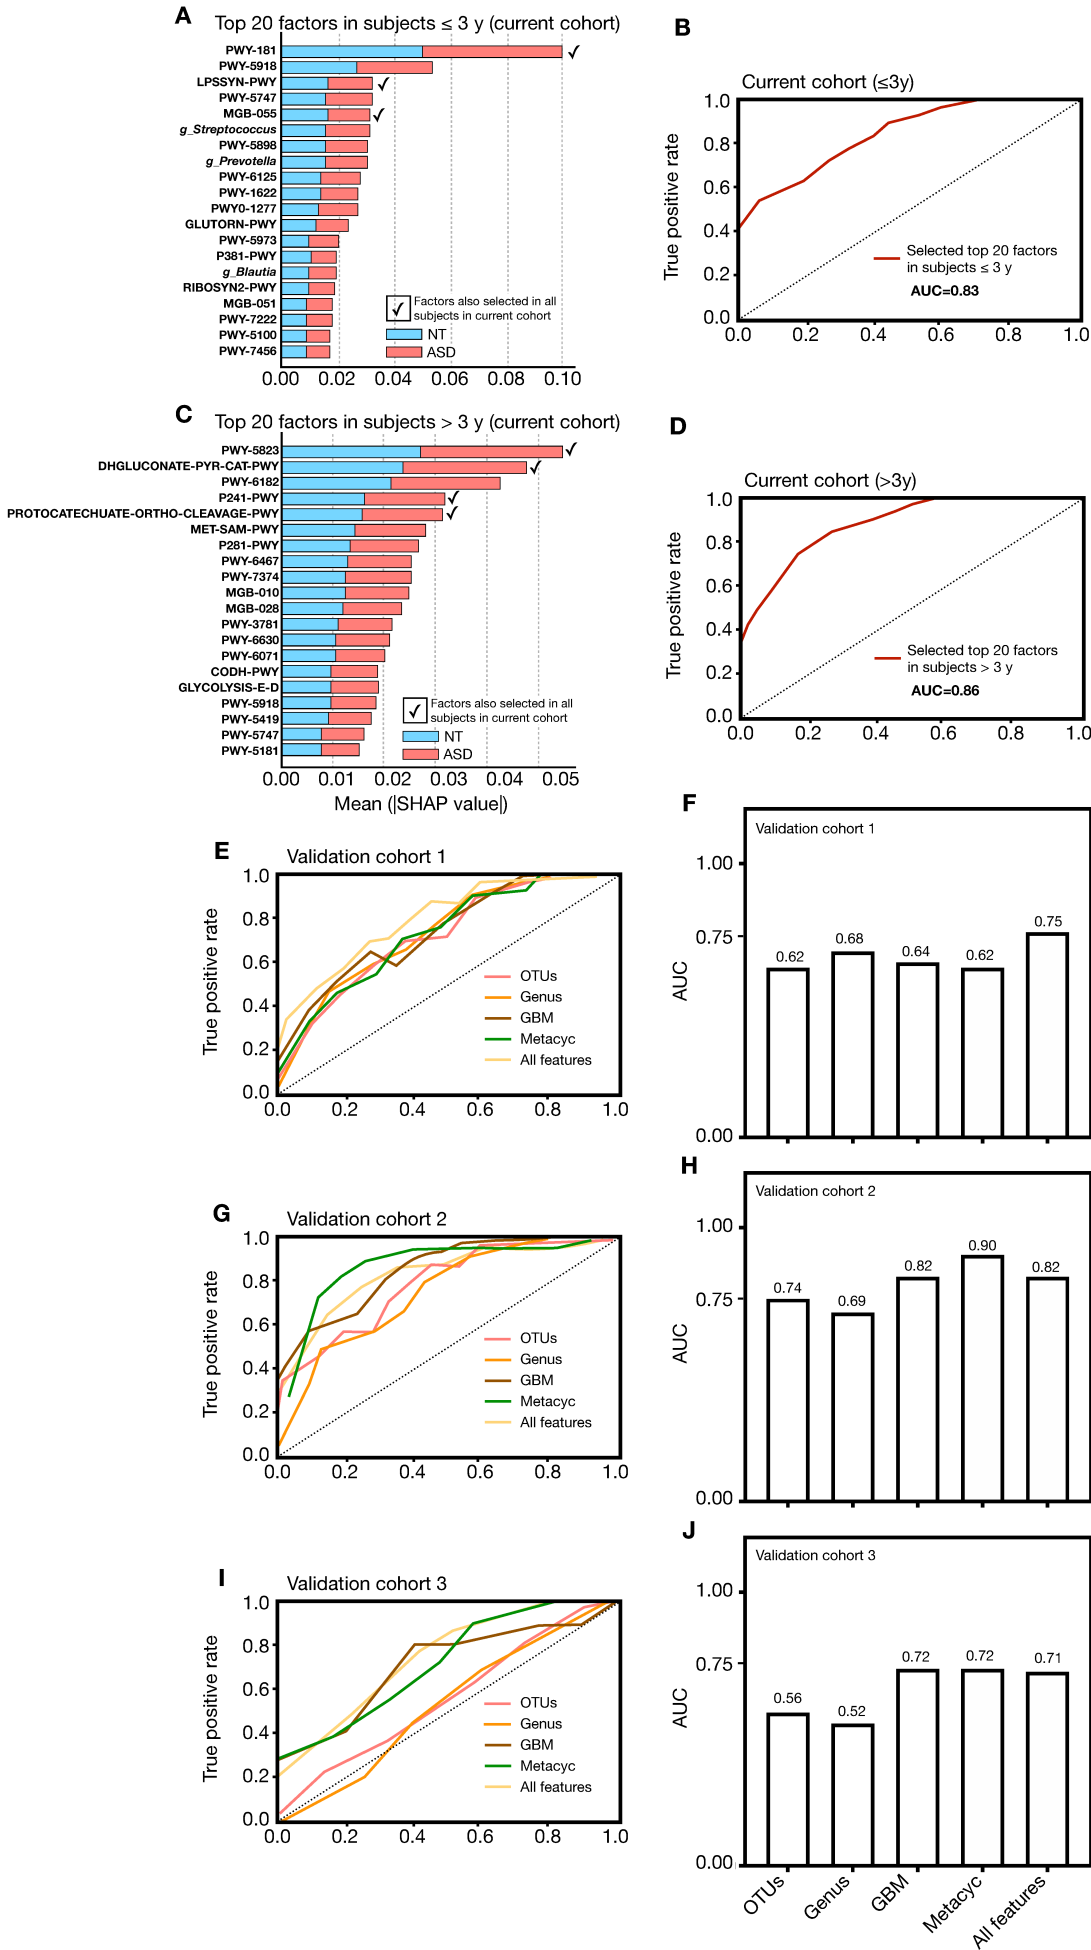

FigureS11

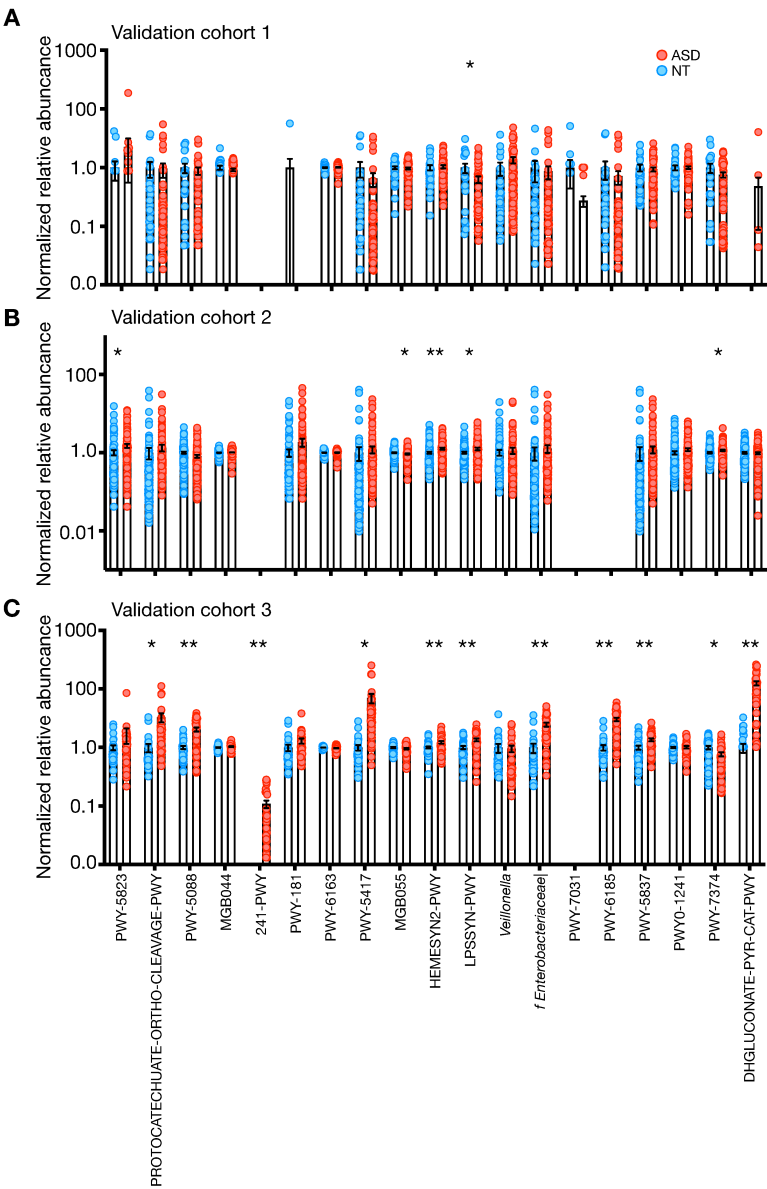

Supplement: inline-supplementary-material-3 [file inline-supplementary-material-3.pdf]
